# Supplementary material
Source: ML conference proceedings conference paper supplement (https://openreview.net/forum?id=ShN3hPUsce5)
Supplement: supplementary_material [file attachment]

# Cross-Domain Adaptive Transfer Reinforcement Learning Based on State-Action Correspondence (Supplementary material)

Heng You<sup>1</sup>

Tianpei Yang <sup>\*1,2</sup>

Yan Zheng<sup>1</sup>

Jianye Hao <sup>\*1</sup>

Matthew E. Taylor<sup>2</sup>

<sup>1</sup>College of Intelligence and Computing, Tianjin University, China

<sup>2</sup>Department of Computing Science, University of Alberta and Alberta Machine Intelligence Institute, Canada

## APPENDIX

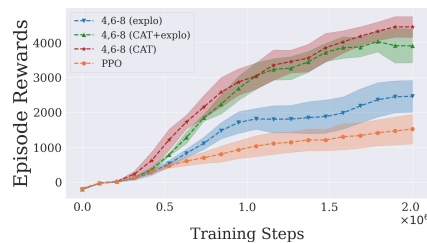

(a) Target Env: CentipedeEight

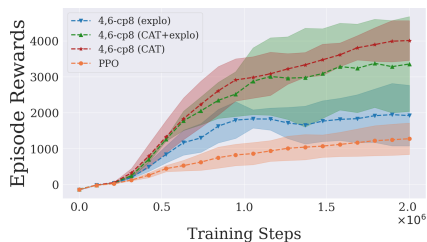

(b) Target Env: CpCentipedeEight

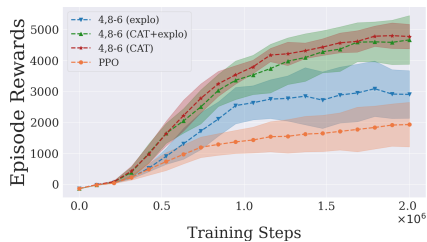

(c) Target Env: CentipedeSix

Figure 1: Performance of different transfer manners including *explo*, CAT and their combination CAT + *explo*.

### Experiments Description

For a Centipede agent, its state includes physical information such as joint angular velocity and twist angle, and its

<sup>\*</sup>Correspondence to Tianpei Yang <tpyang@tju.edu.cn>, Jianye Hao <jianye.hao@tju.edu.cn>

actions include control information for the torso bodies and legs, the same is true for the other two types of agents. See Table 1 for the state- action dimensions and source policy performance of all the agents, where “C-4” represents CentipedeFour. Although these agents have completely different state and action dimensions, they share the same dynamic principles, as well as similar physical structures and reward functions, which may be beneficial for transfer learning between different agents with different morphologies.

Table 1: The state-action dimensions and source policy performance of our environments.

| Env  | State Dim | Action Dim | Performance |
|------|-----------|------------|-------------|
| C-4  | 97        | 10         | 2600        |
| C-6  | 139       | 16         | 2000        |
| C-8  | 181       | 22         | 1500        |
| Cp-6 | 139       | 12         | 1610        |
| Cp-8 | 181       | 18         | 1440        |
| Ant  | 111       | 8          | 1100        |

### Parameter Settings

The structure is the same for all networks: two fully-connected hidden layers both with 64 hidden units. See Table 2 for all the hyperparameters used in this paper.

Table 2: CAT hyperparameters.

| Hyperparameter               | Value              |
|------------------------------|--------------------|
| Discount factor ( $\gamma$ ) | 0.99               |
| Activation                   | tanh               |
| Optimizer                    | Adam               |
| Learning Rate                | $3 \times 10^{-4}$ |
| Clip range ( $\epsilon$ )    | 0.2                |
| Evaluate steps               | 200                |
| Batch size                   | 64                 |

### Different Transfer Manners

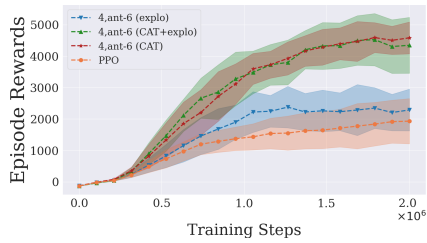

(a) Target Env: CentipedeSix

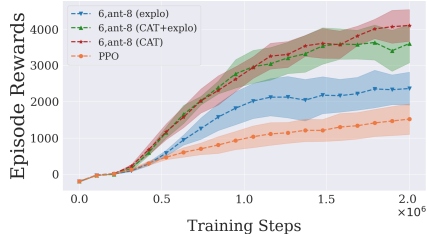

(b) Target Env: CentipedeEight

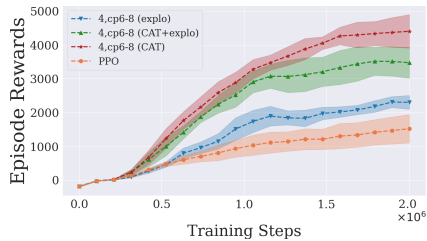

(c) Target Env: CentipedeEight

Figure 2: Performance of different transfer manners including *explo*, CAT and their combination CAT + *explo*.

In this experiment, we apply the two major transfer methods mentioned in Section 1 to the cross-domain setting through the learnt state-action correspondence to validate the choice in this paper. All the different transfer methods and their combination are as follows:

- *explo*: Reusing source policies to interact with the environment for exploration at a decreasing rate.
- CAT: Distilling knowledge from multiple source policy networks into the middle layers of the target policy networks used in CAT.
- CAT + *explo*: Applying *explo* while distilling knowledge from source policy networks.

Figure 1 and 2 show the performance of different transfer methods. We can see that the performance of *explo* is the worst except PPO since *explo* only selects one source policy at the same time to help the target task for exploration, which is an insufficient and ineffective method compared to CAT. In contrast, the CAT agent extracts useful knowledge of each source policy by combining knowledge from source policy networks through the adaptive weighting factors, thus outperforms all methods. Finally, we can see that the performance of CAT + *explo* is slightly lower than CAT

in most cases. From our point of view, this is because *explo* reduces the effectiveness of CAT for the reasons we mentioned above. The results validate our choice in this paper.
