# Supplementary material
Source: ML conference proceedings conference paper supplement (https://openreview.net/forum?id=ShN3hPUsce5)

Episode Rewards

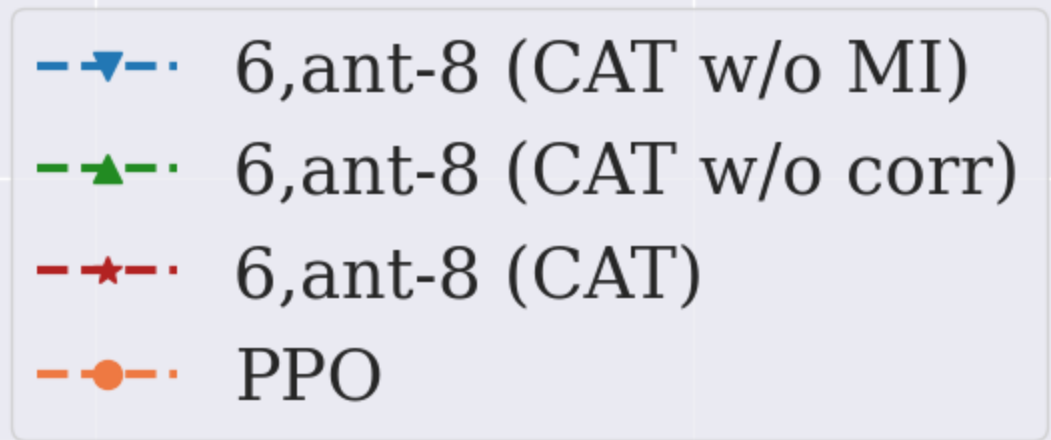

Training Steps

$\times 10^6$

Supplement: supplementary_material [file attachment]

Episode Rewards

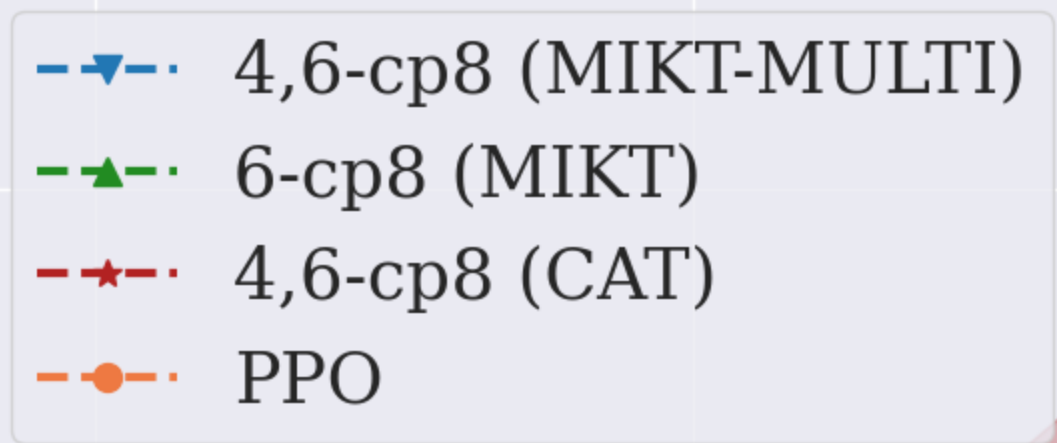

Training Steps

$\times 10^6$

Supplement: supplementary_material [file attachment]

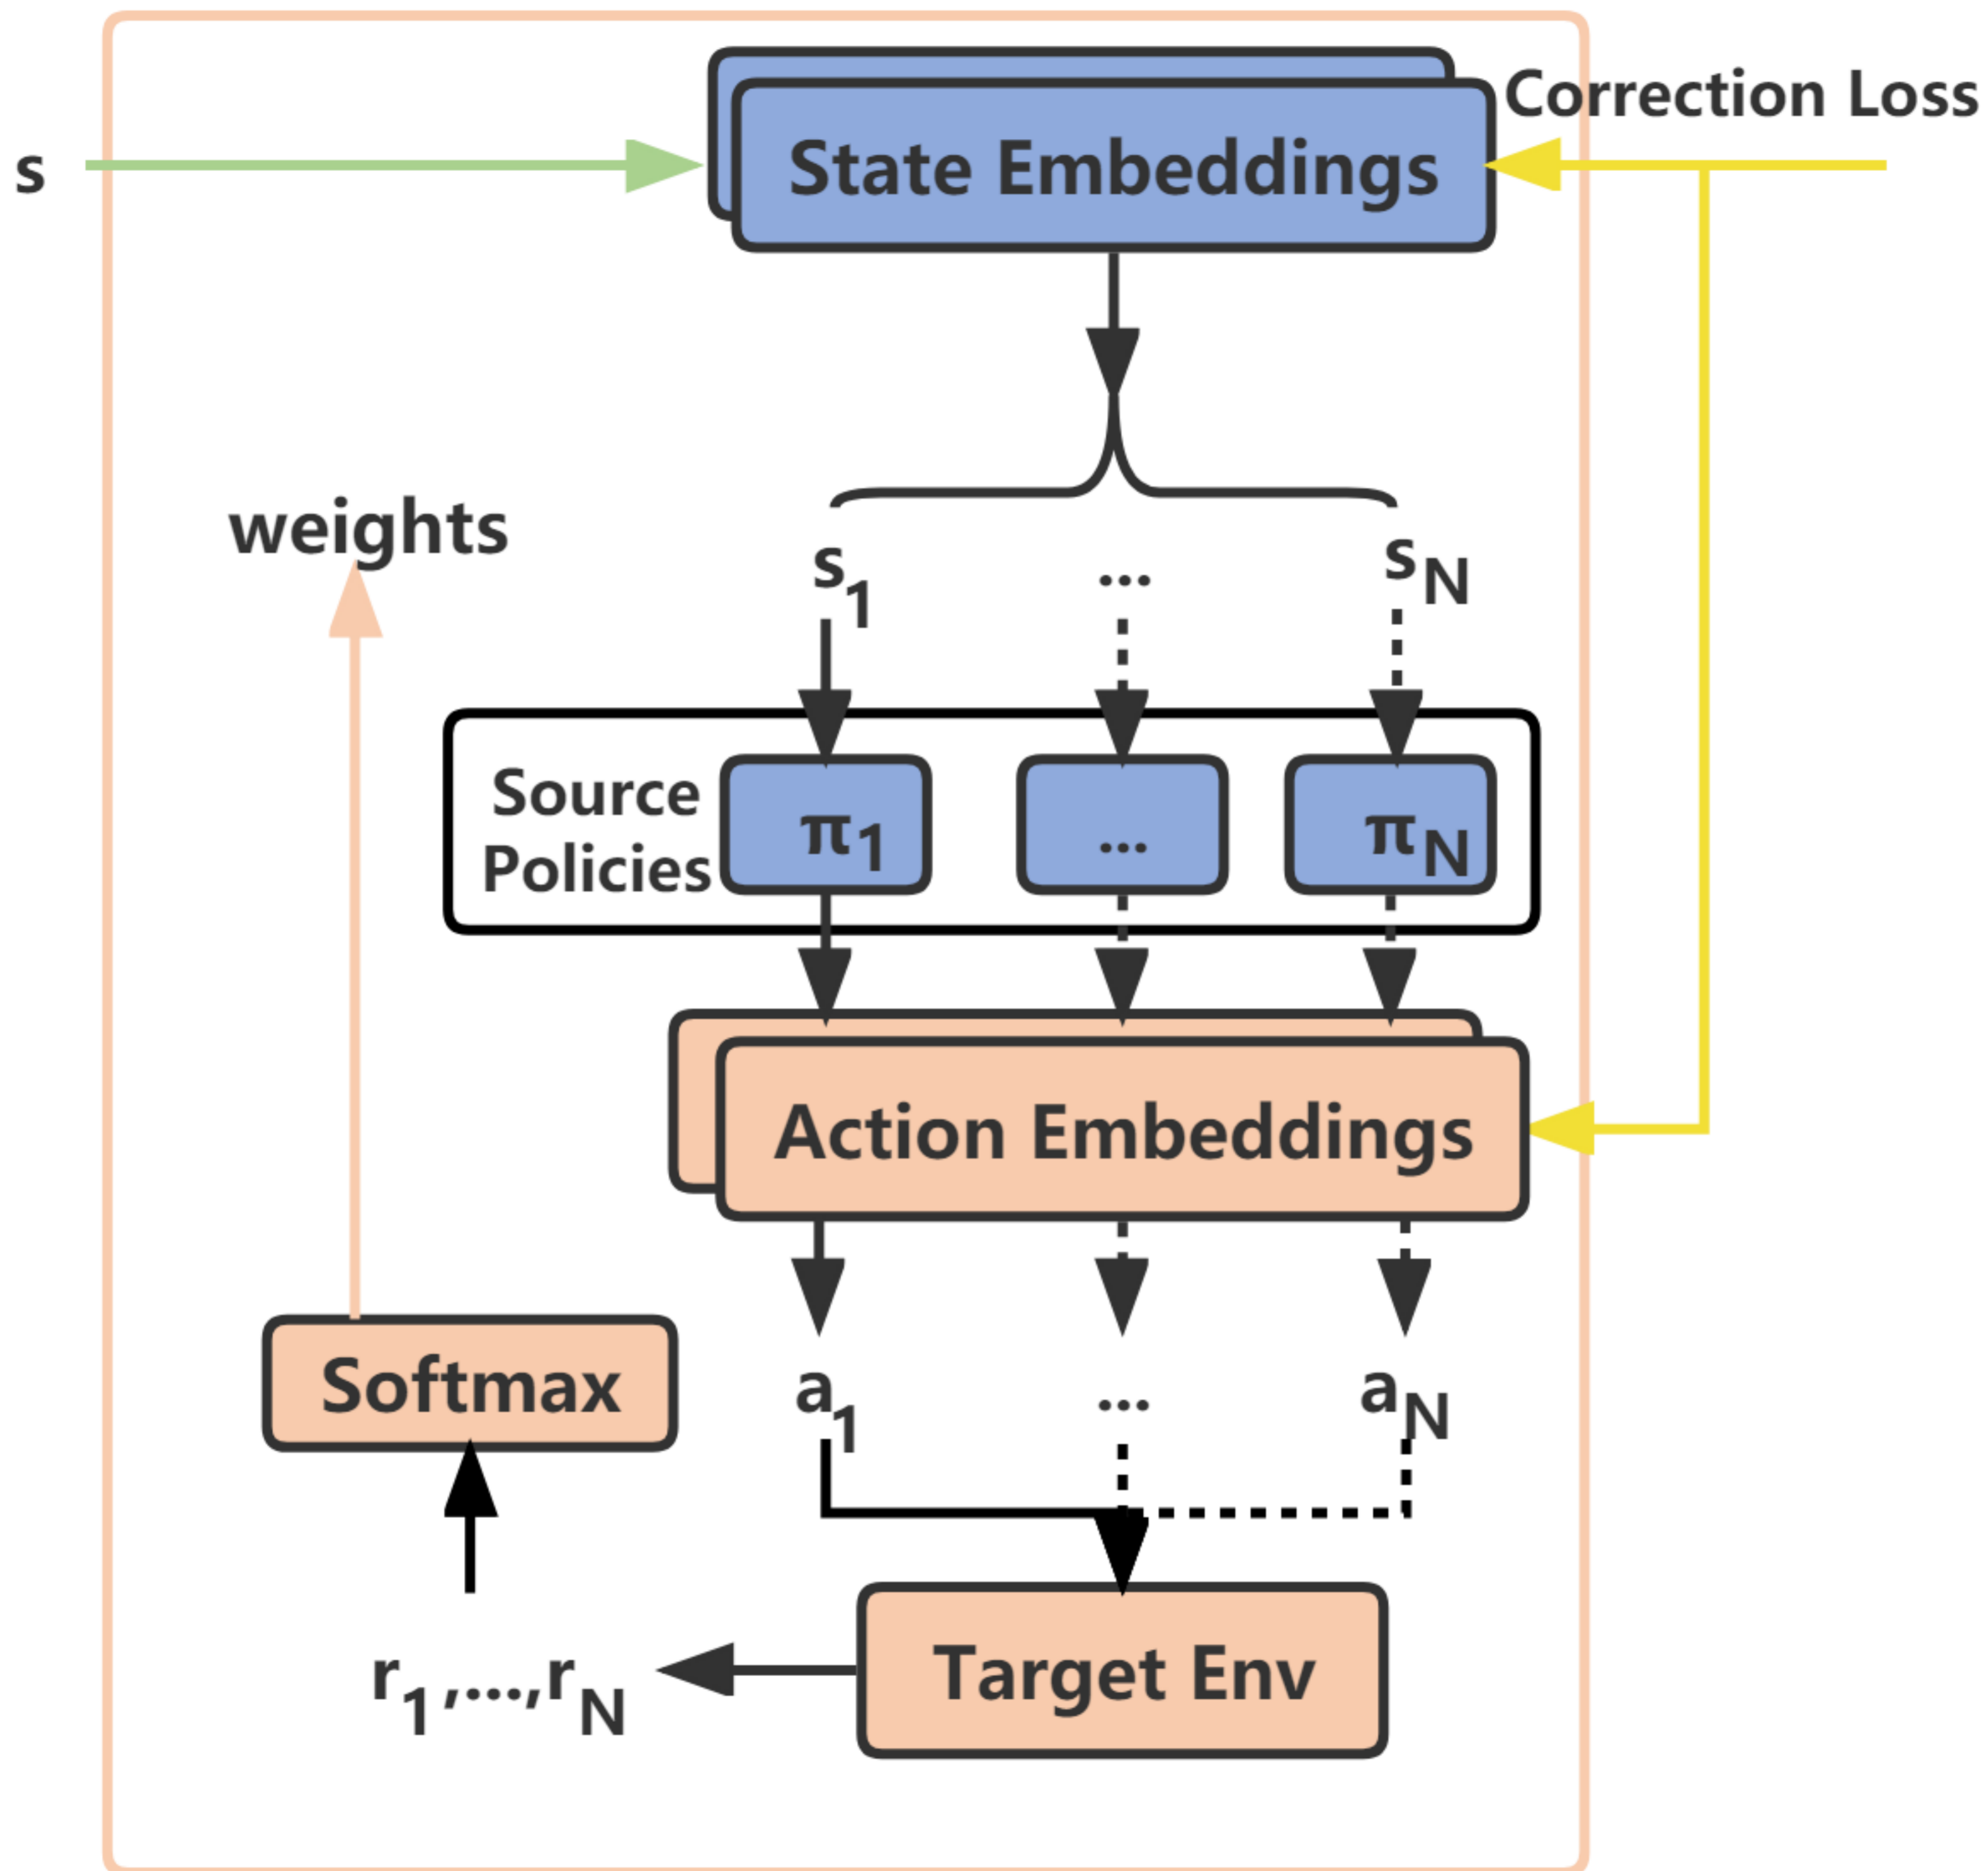

Supplement: supplementary_material [file attachment]

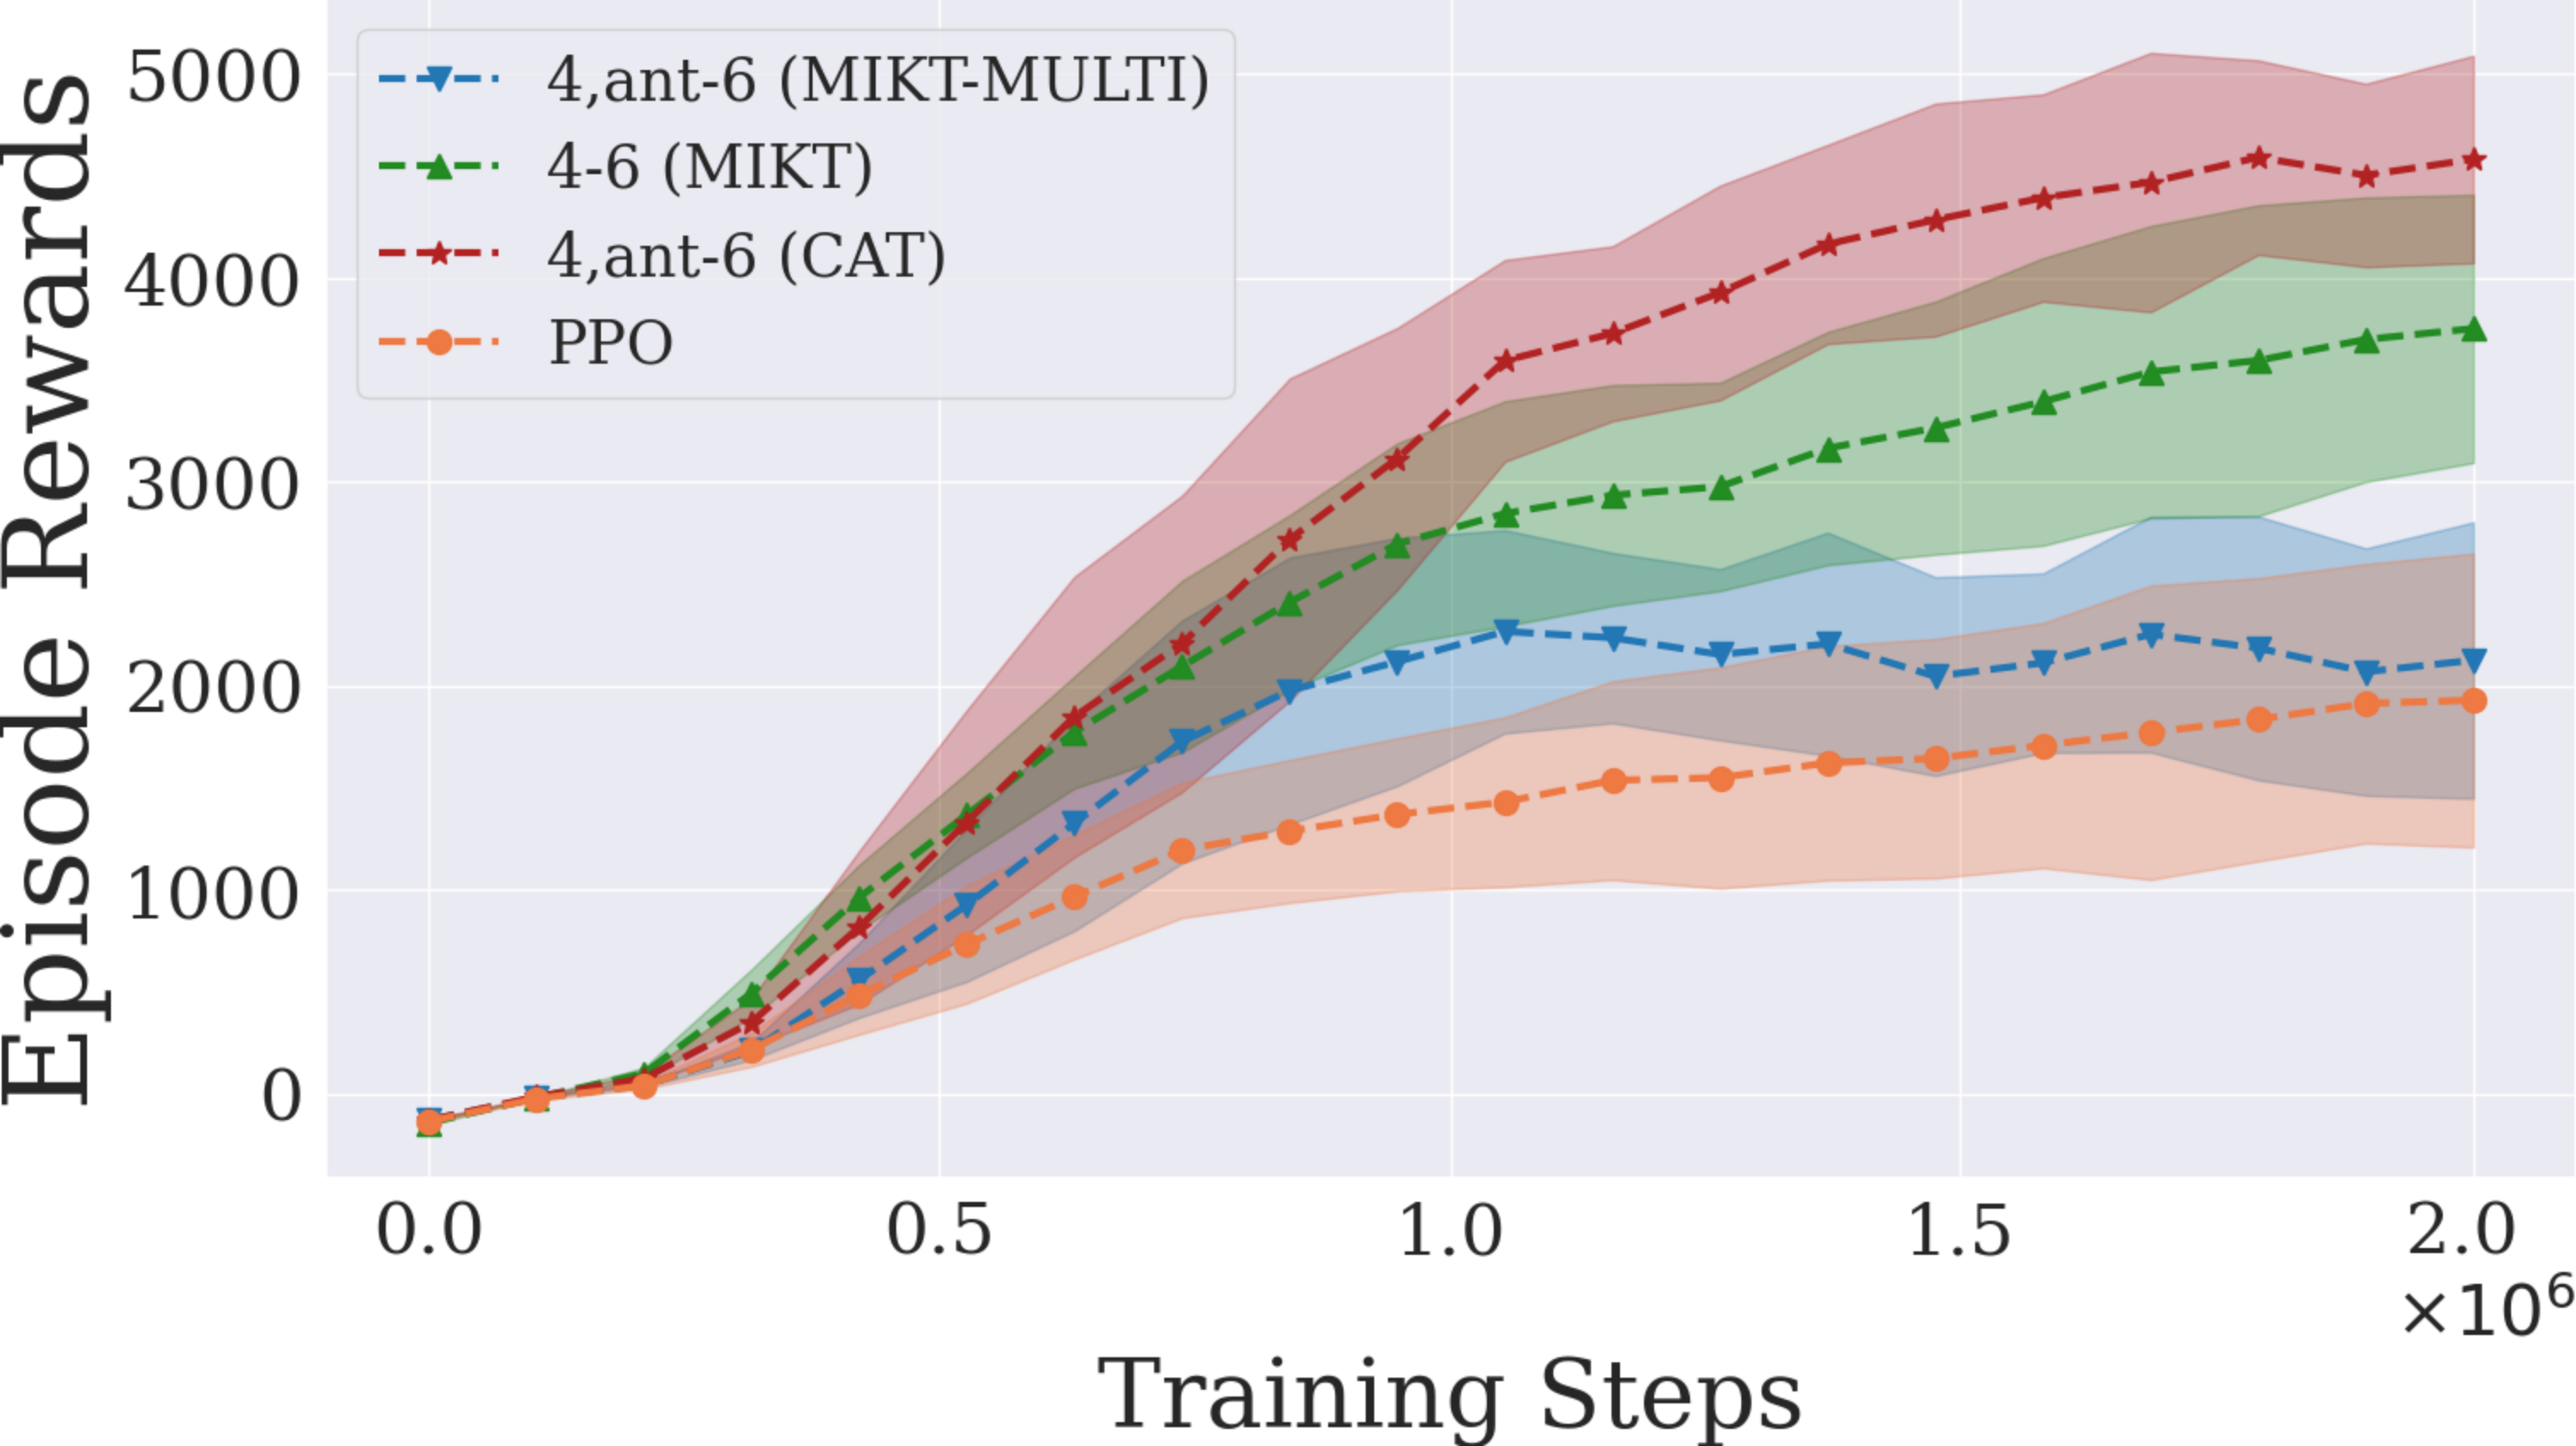

Supplement: supplementary_material [file attachment]

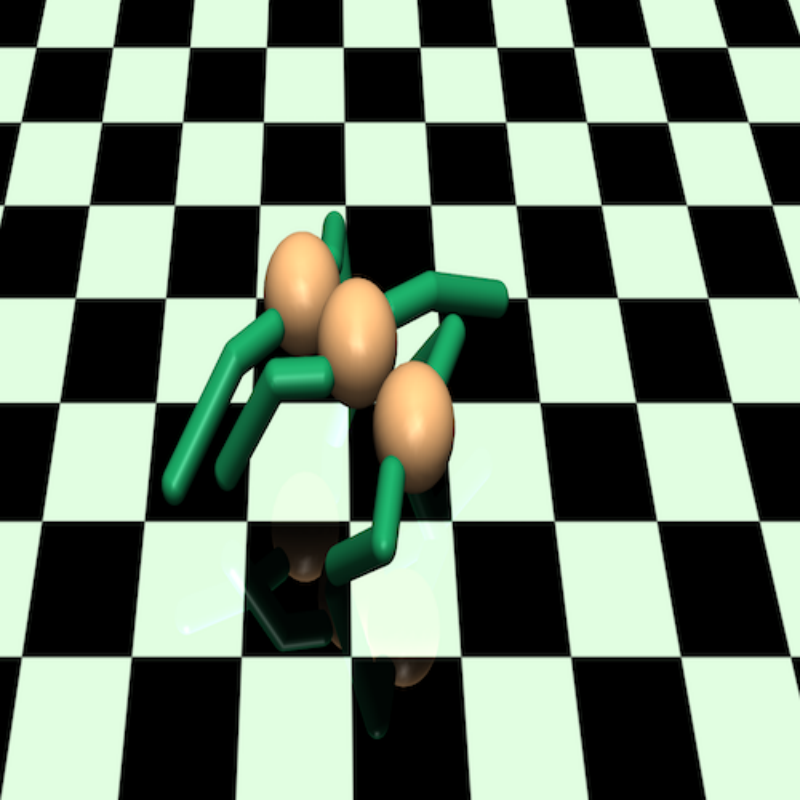

Supplement: supplementary_material [file attachment]

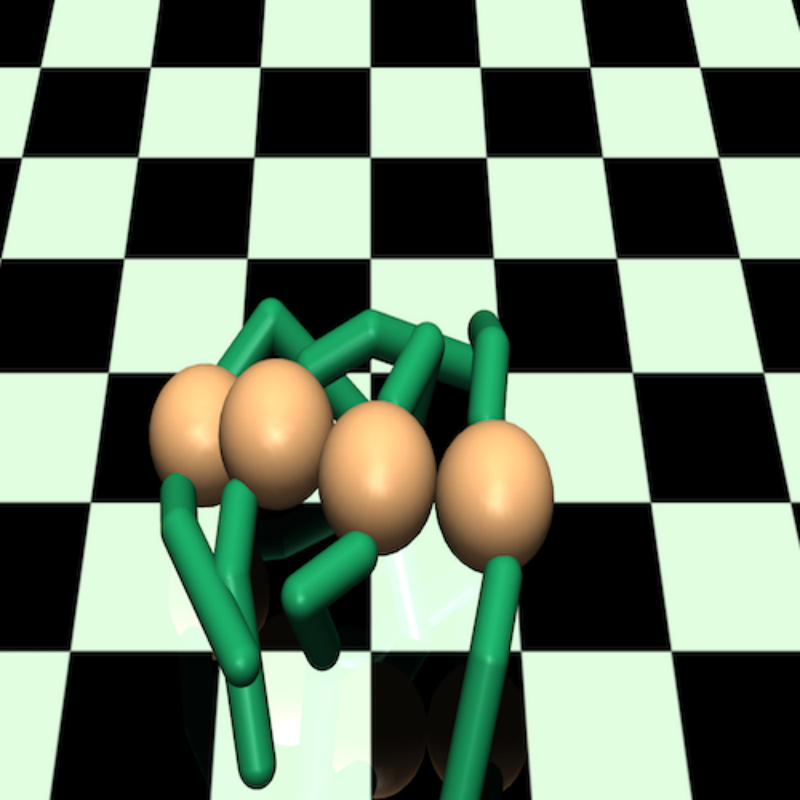

Supplement: supplementary_material [file attachment]

**Correction Loss &  
Cycle-Consistence Loss**

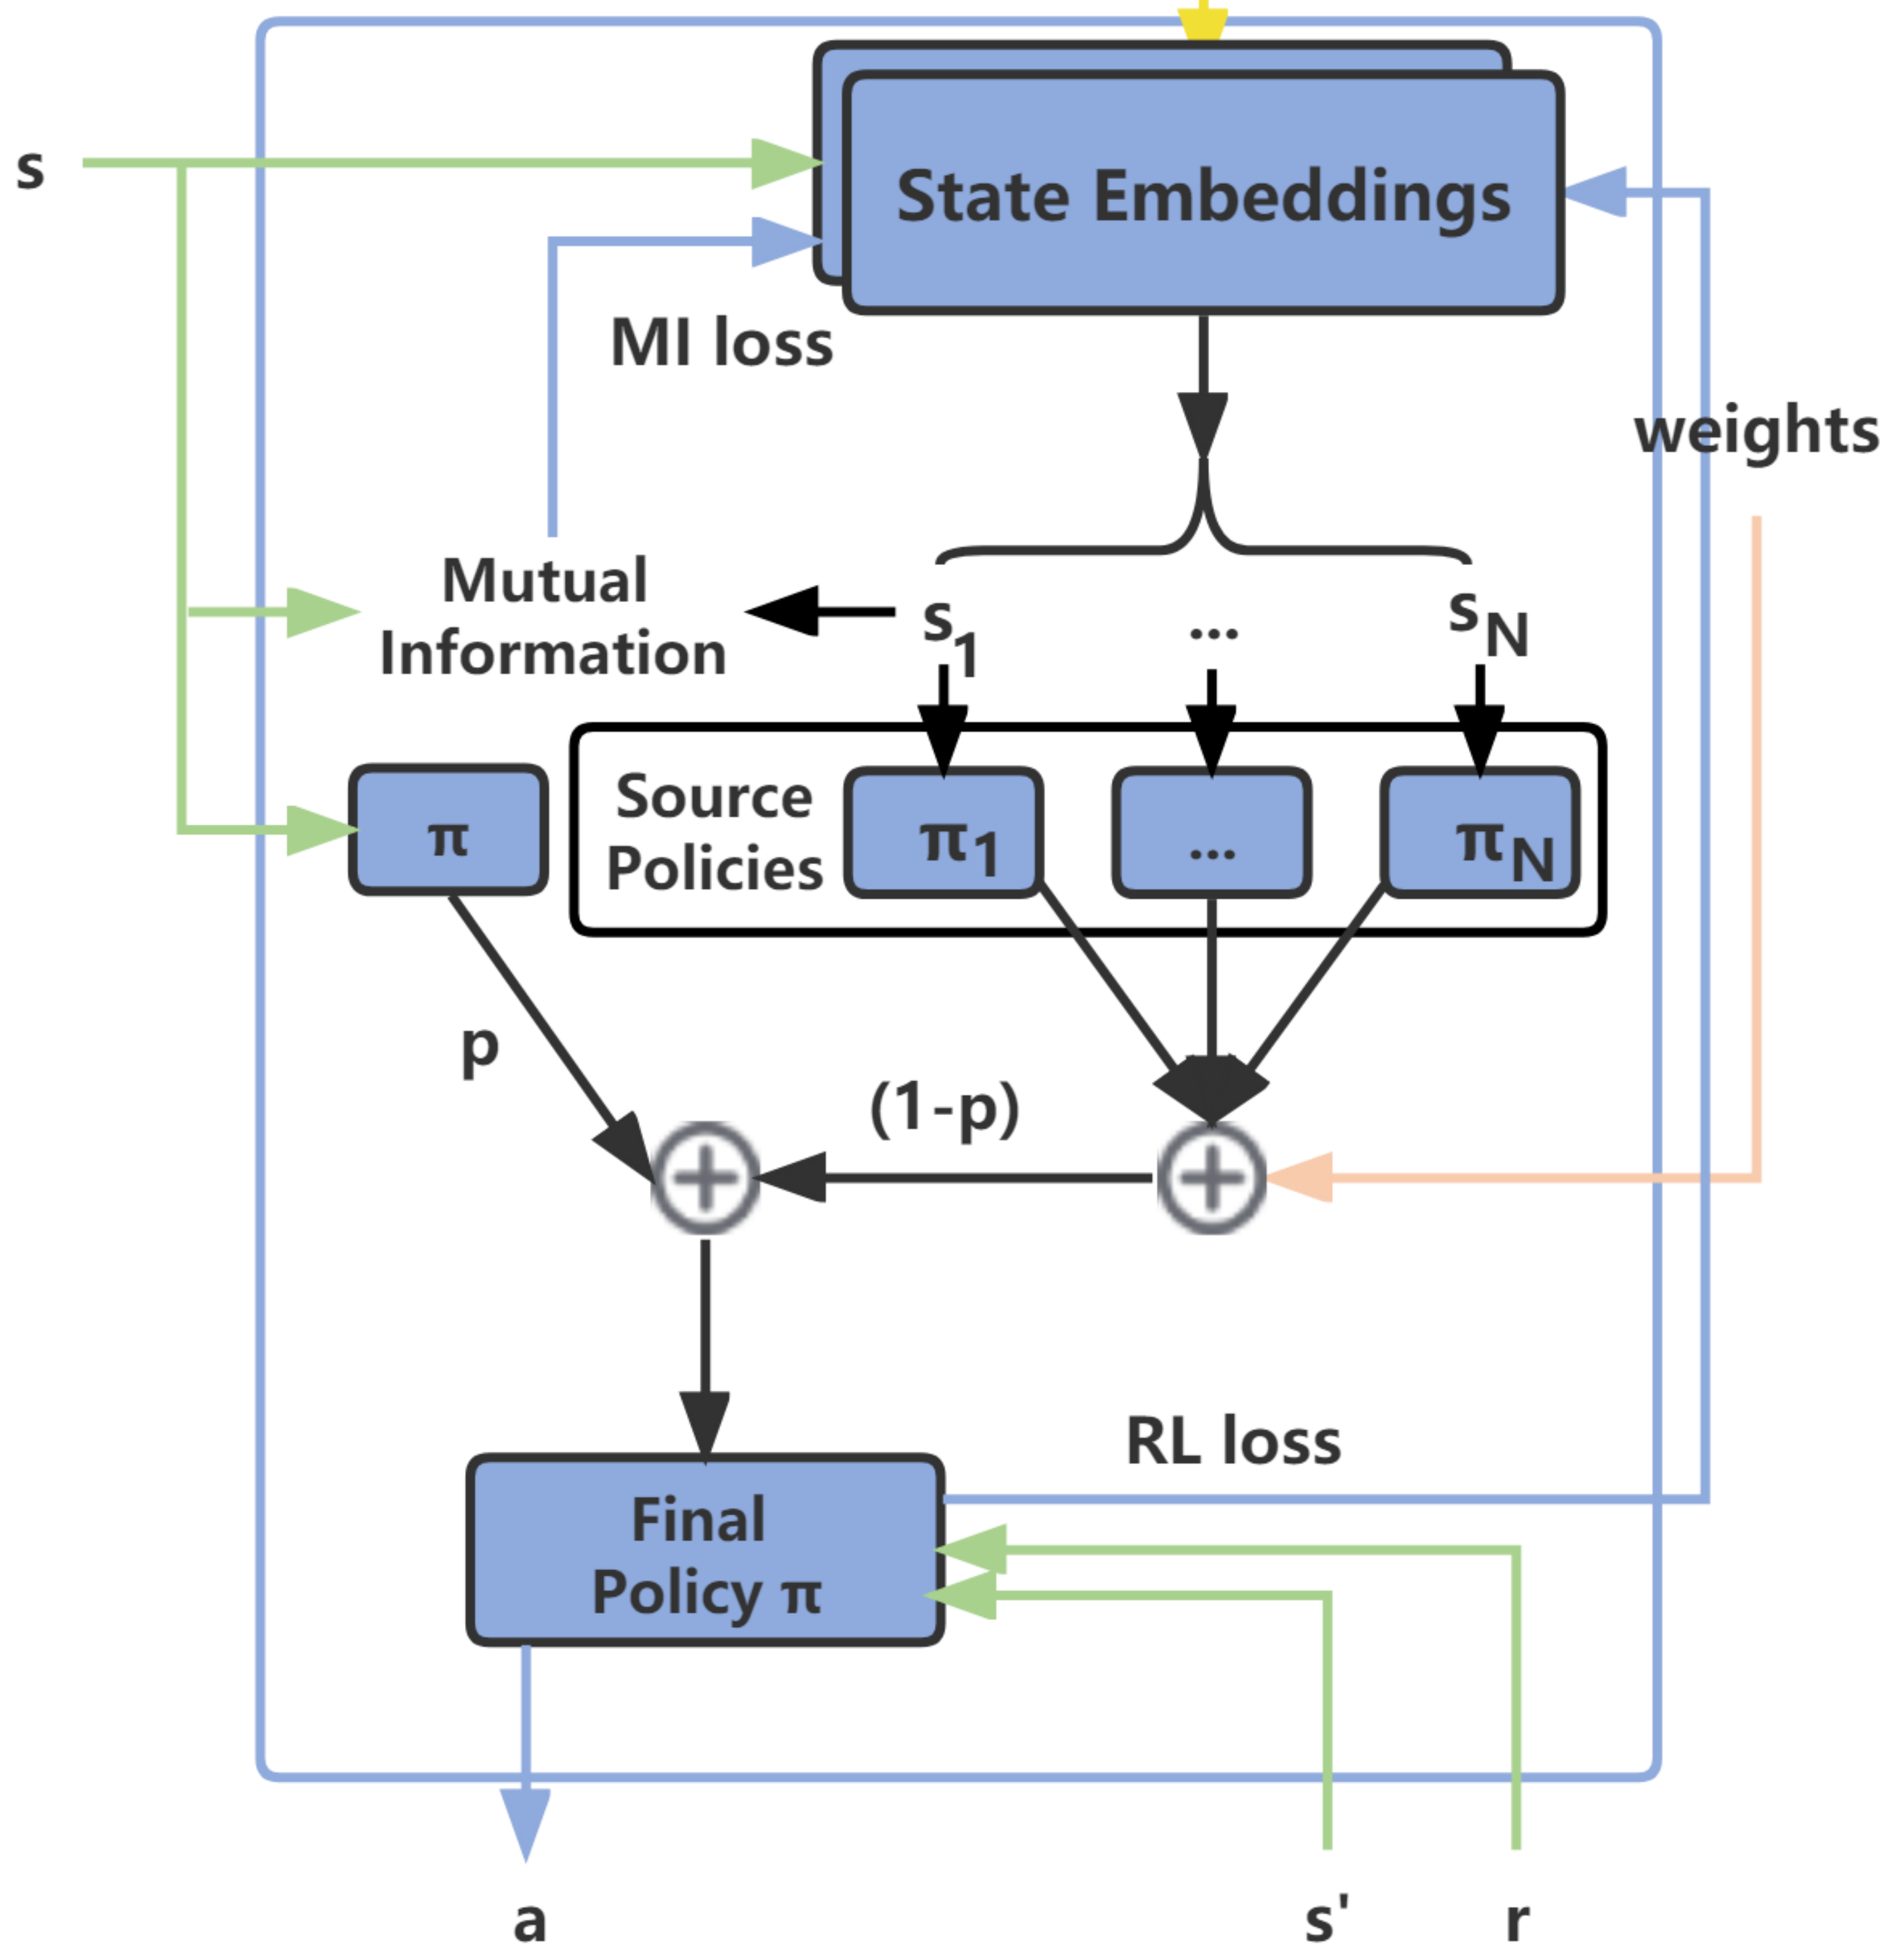

Supplement: supplementary_material [file attachment]

# Episode Rewards

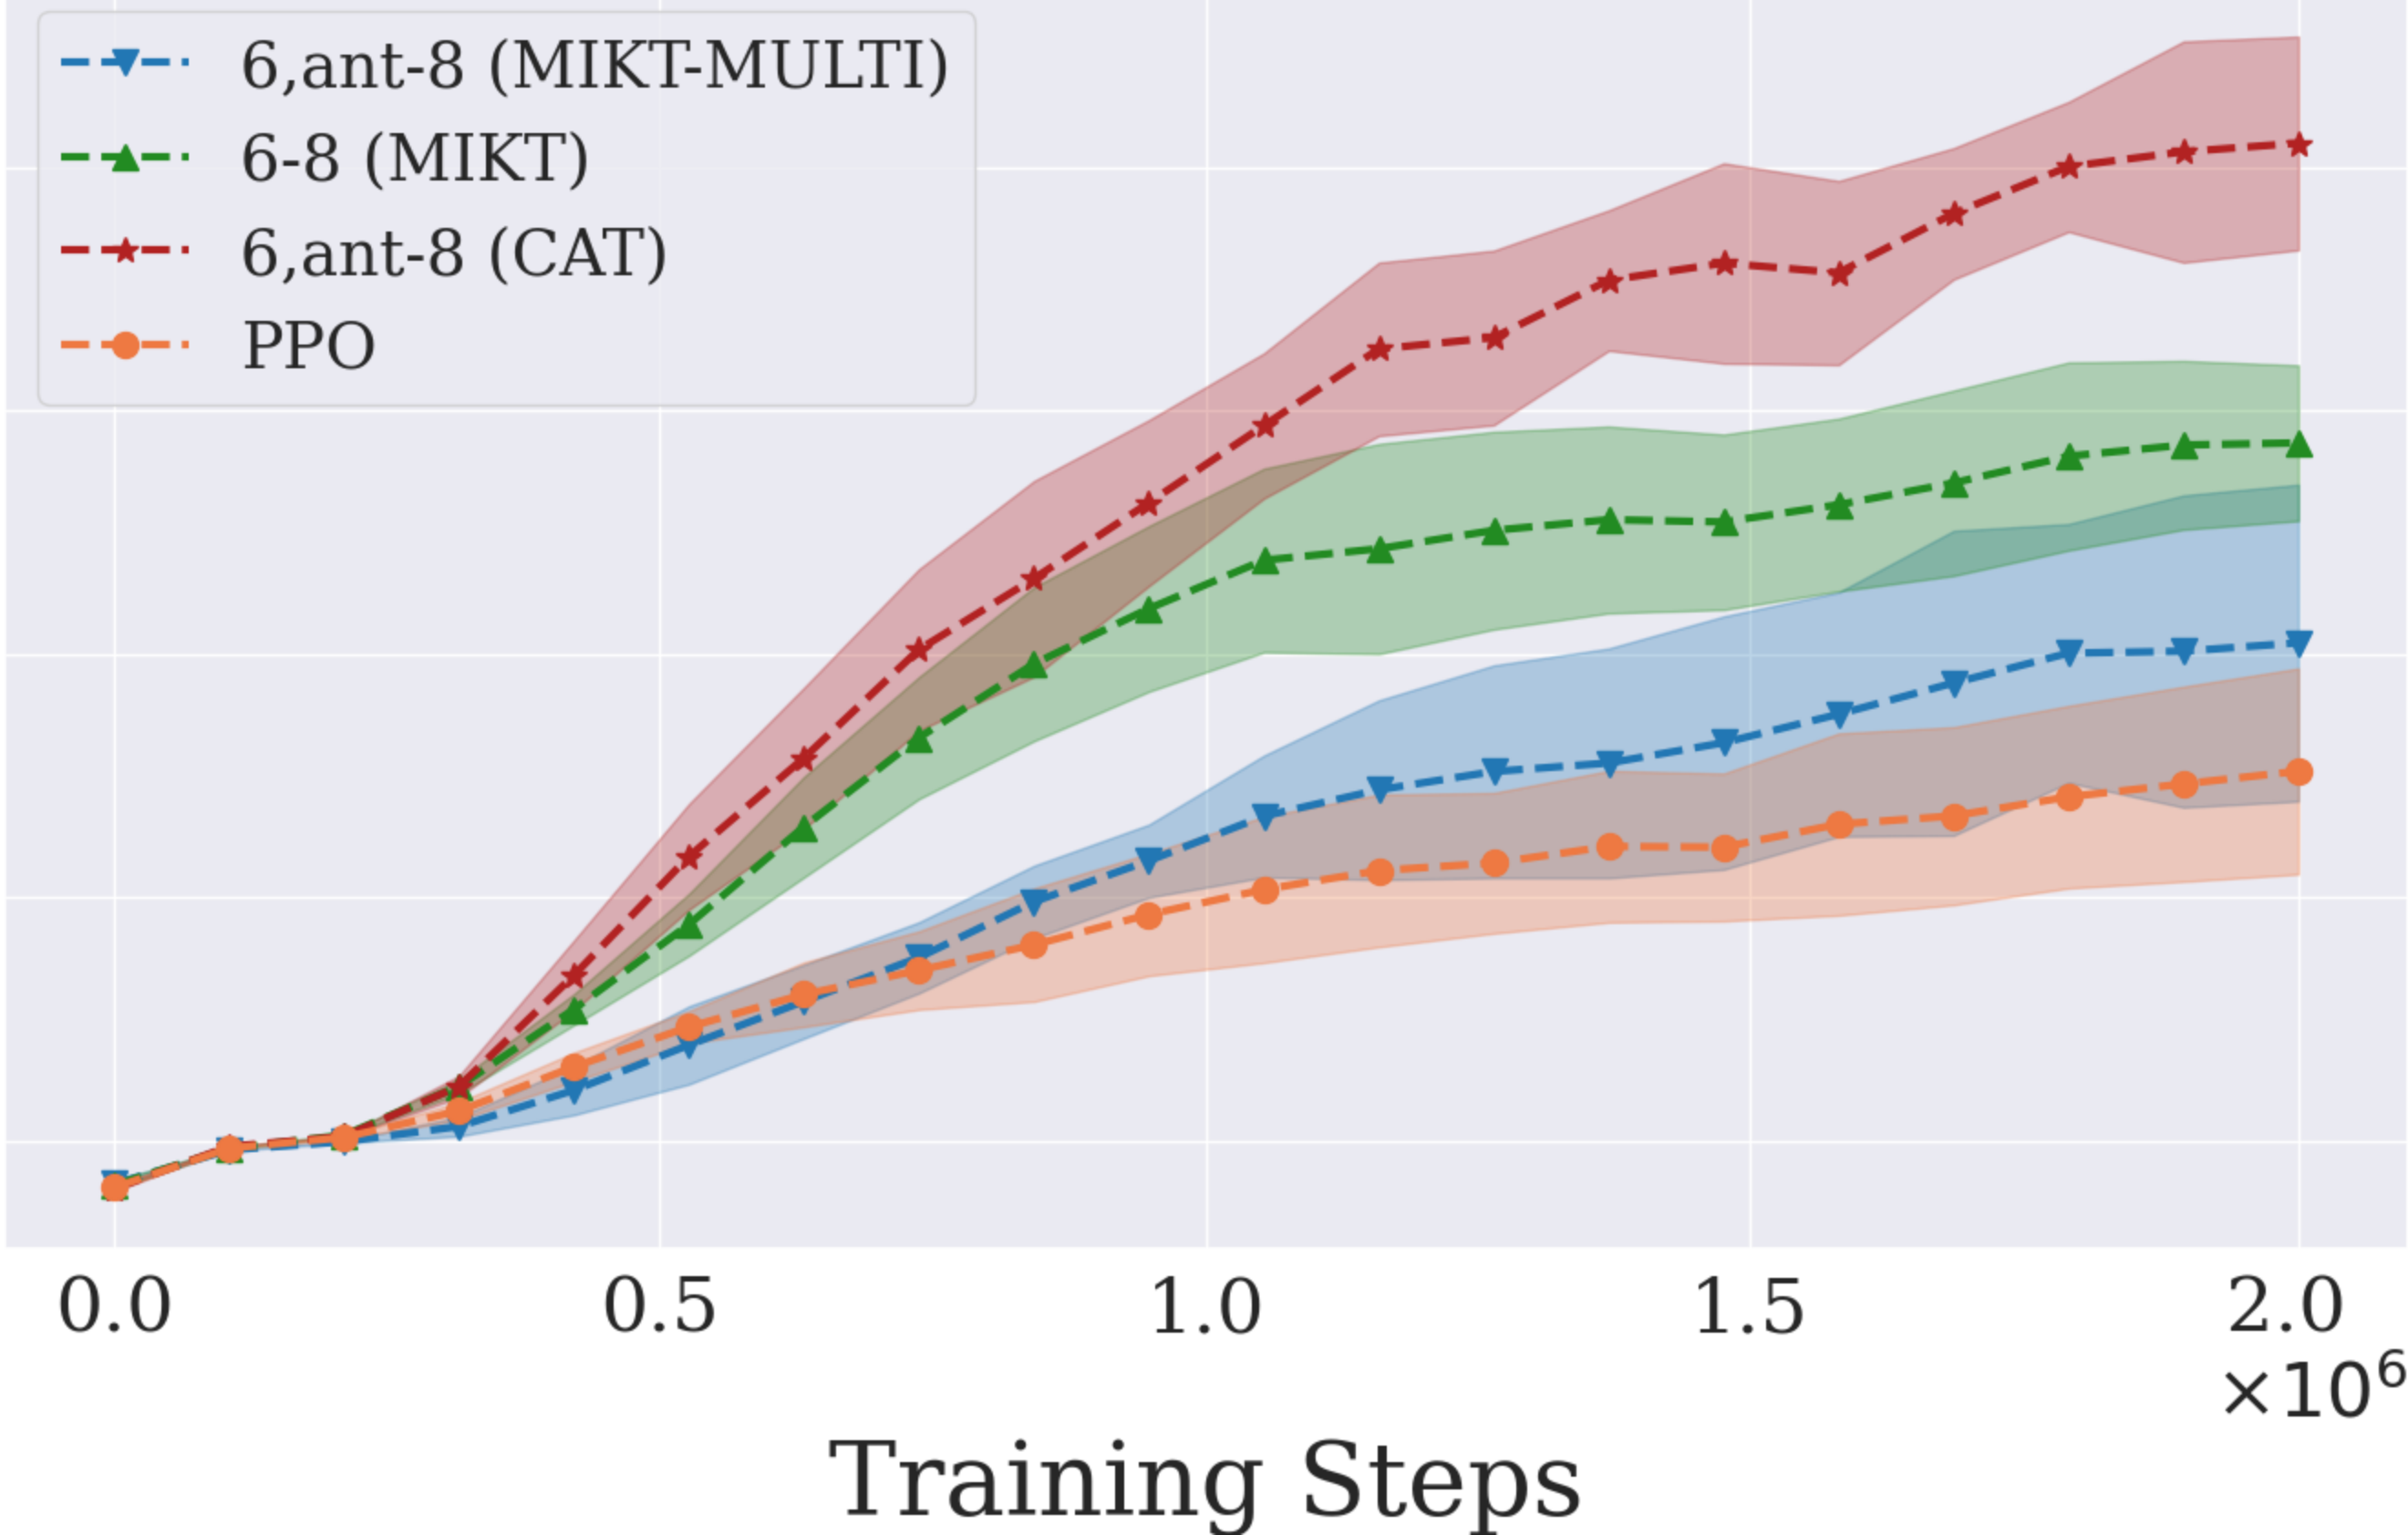

Supplement: supplementary_material [file attachment]

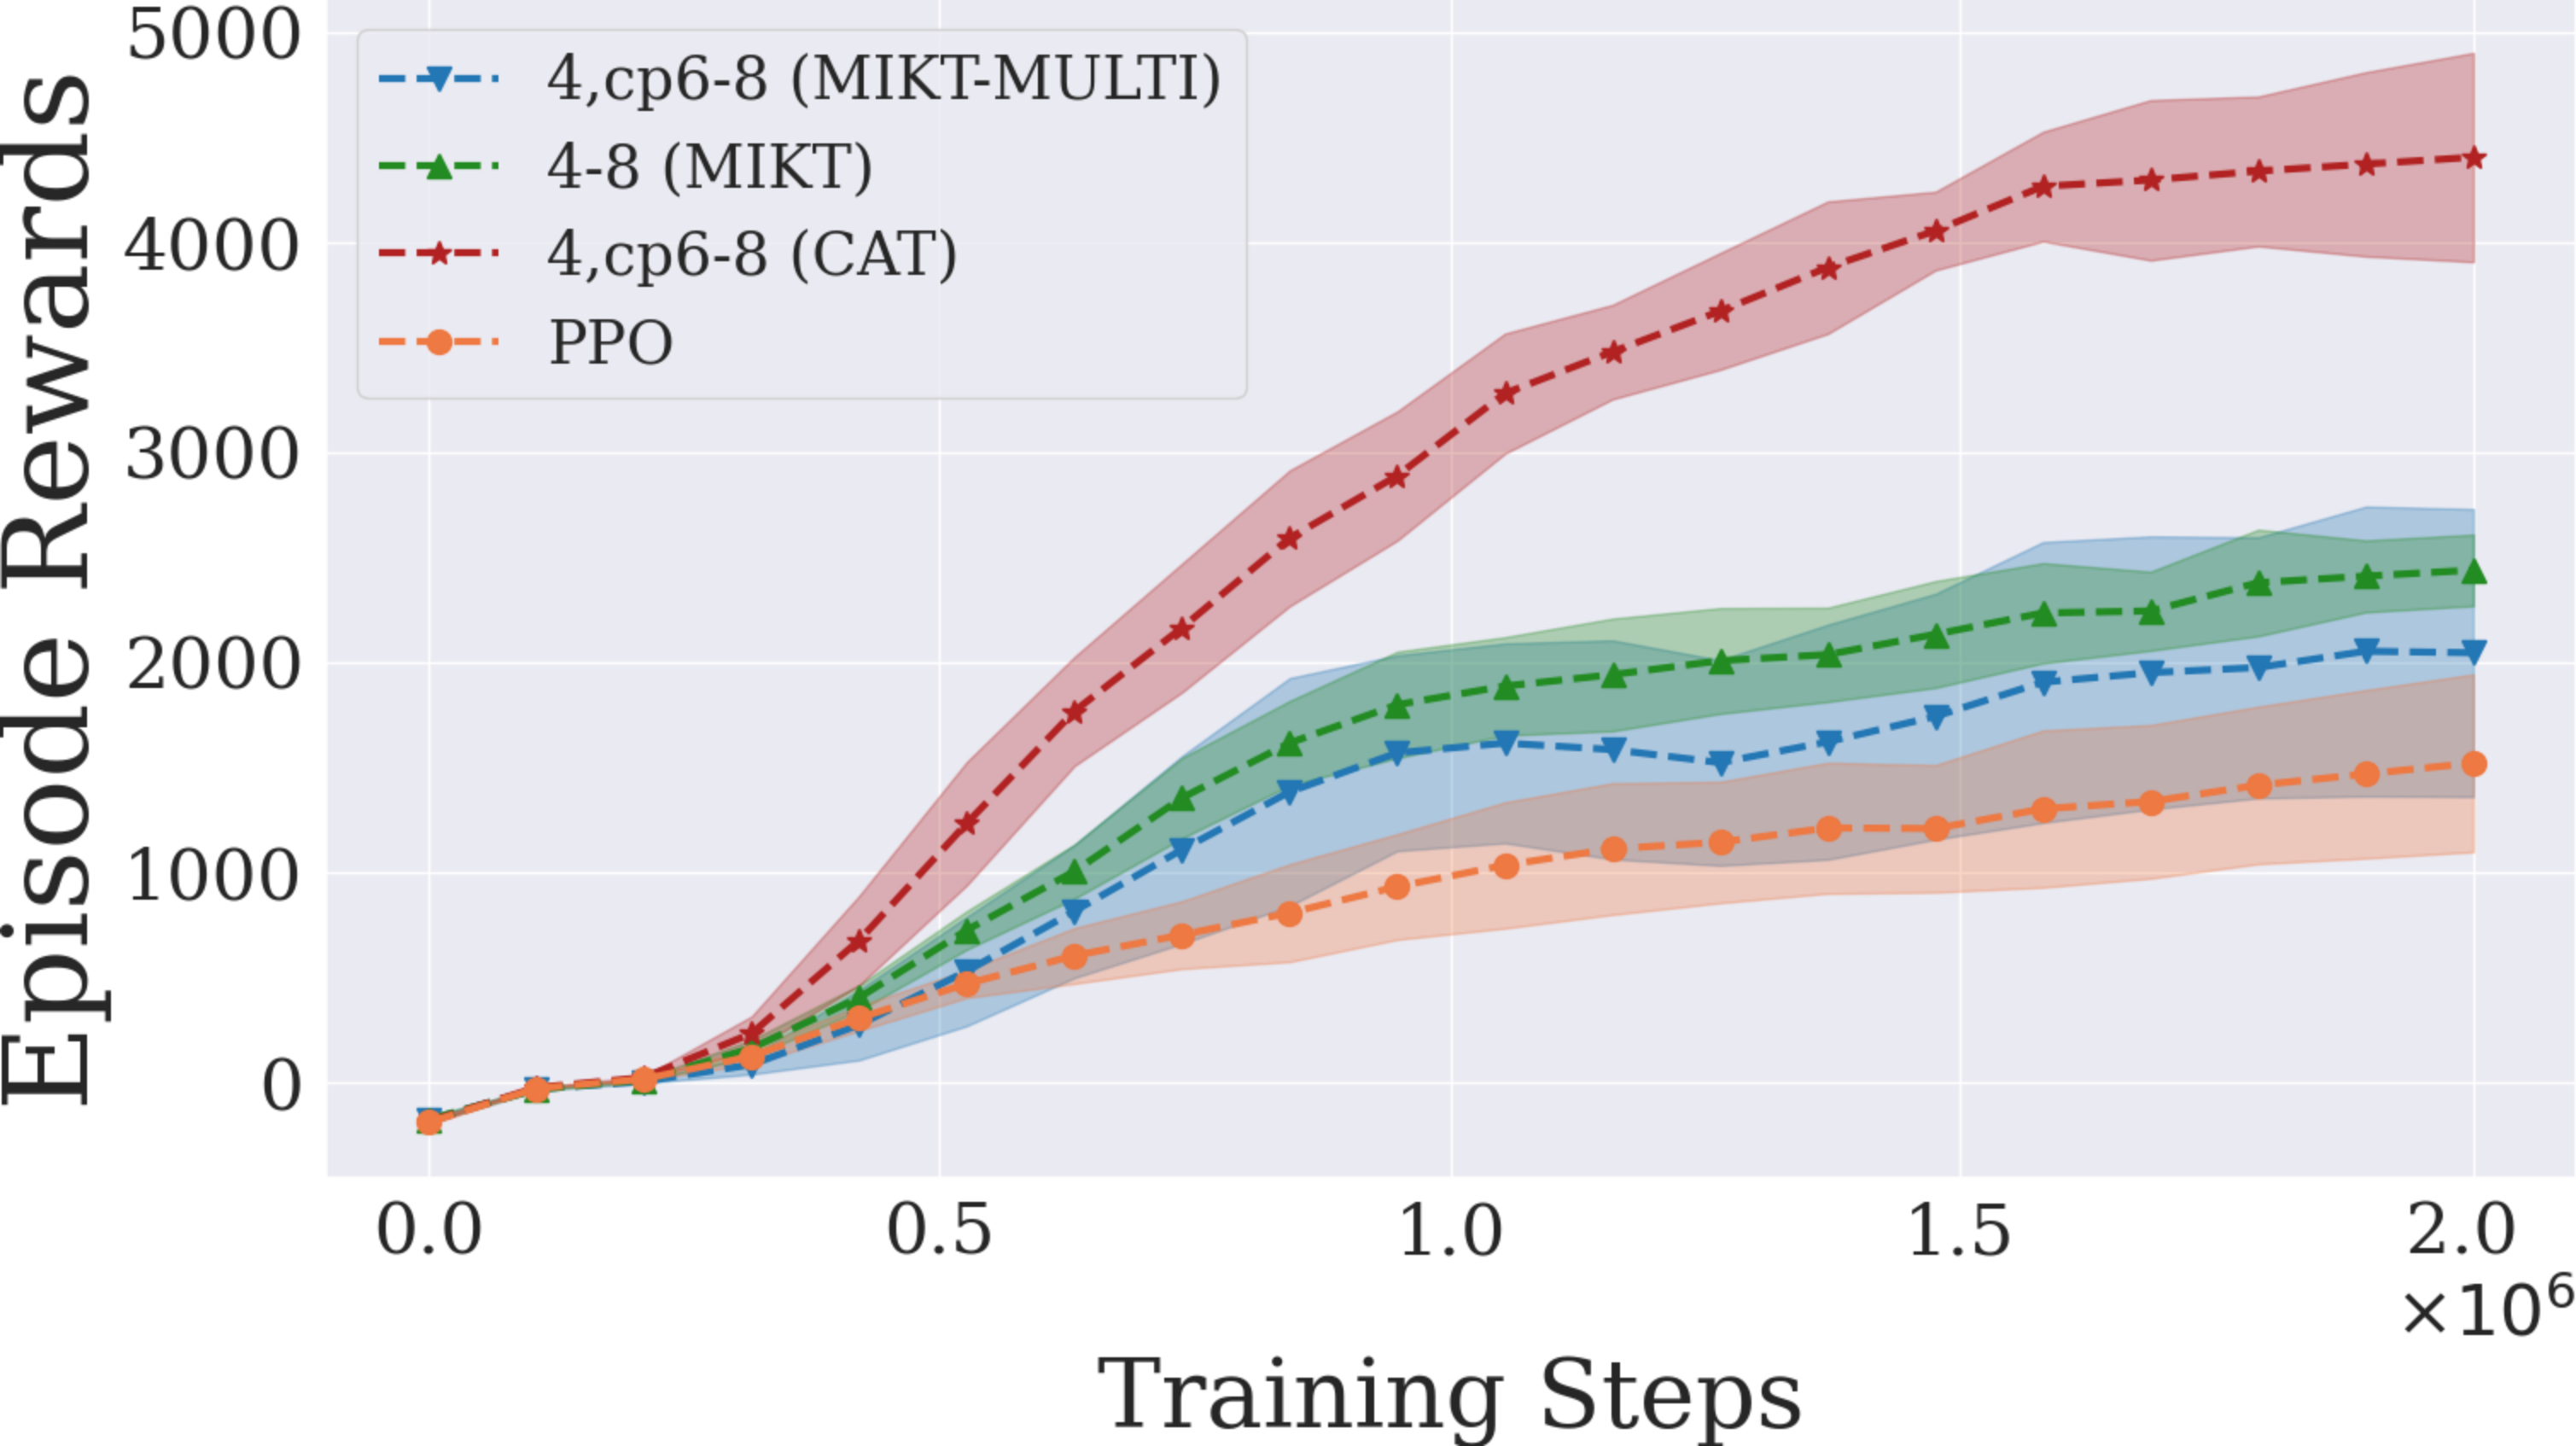

Supplement: supplementary_material [file attachment]

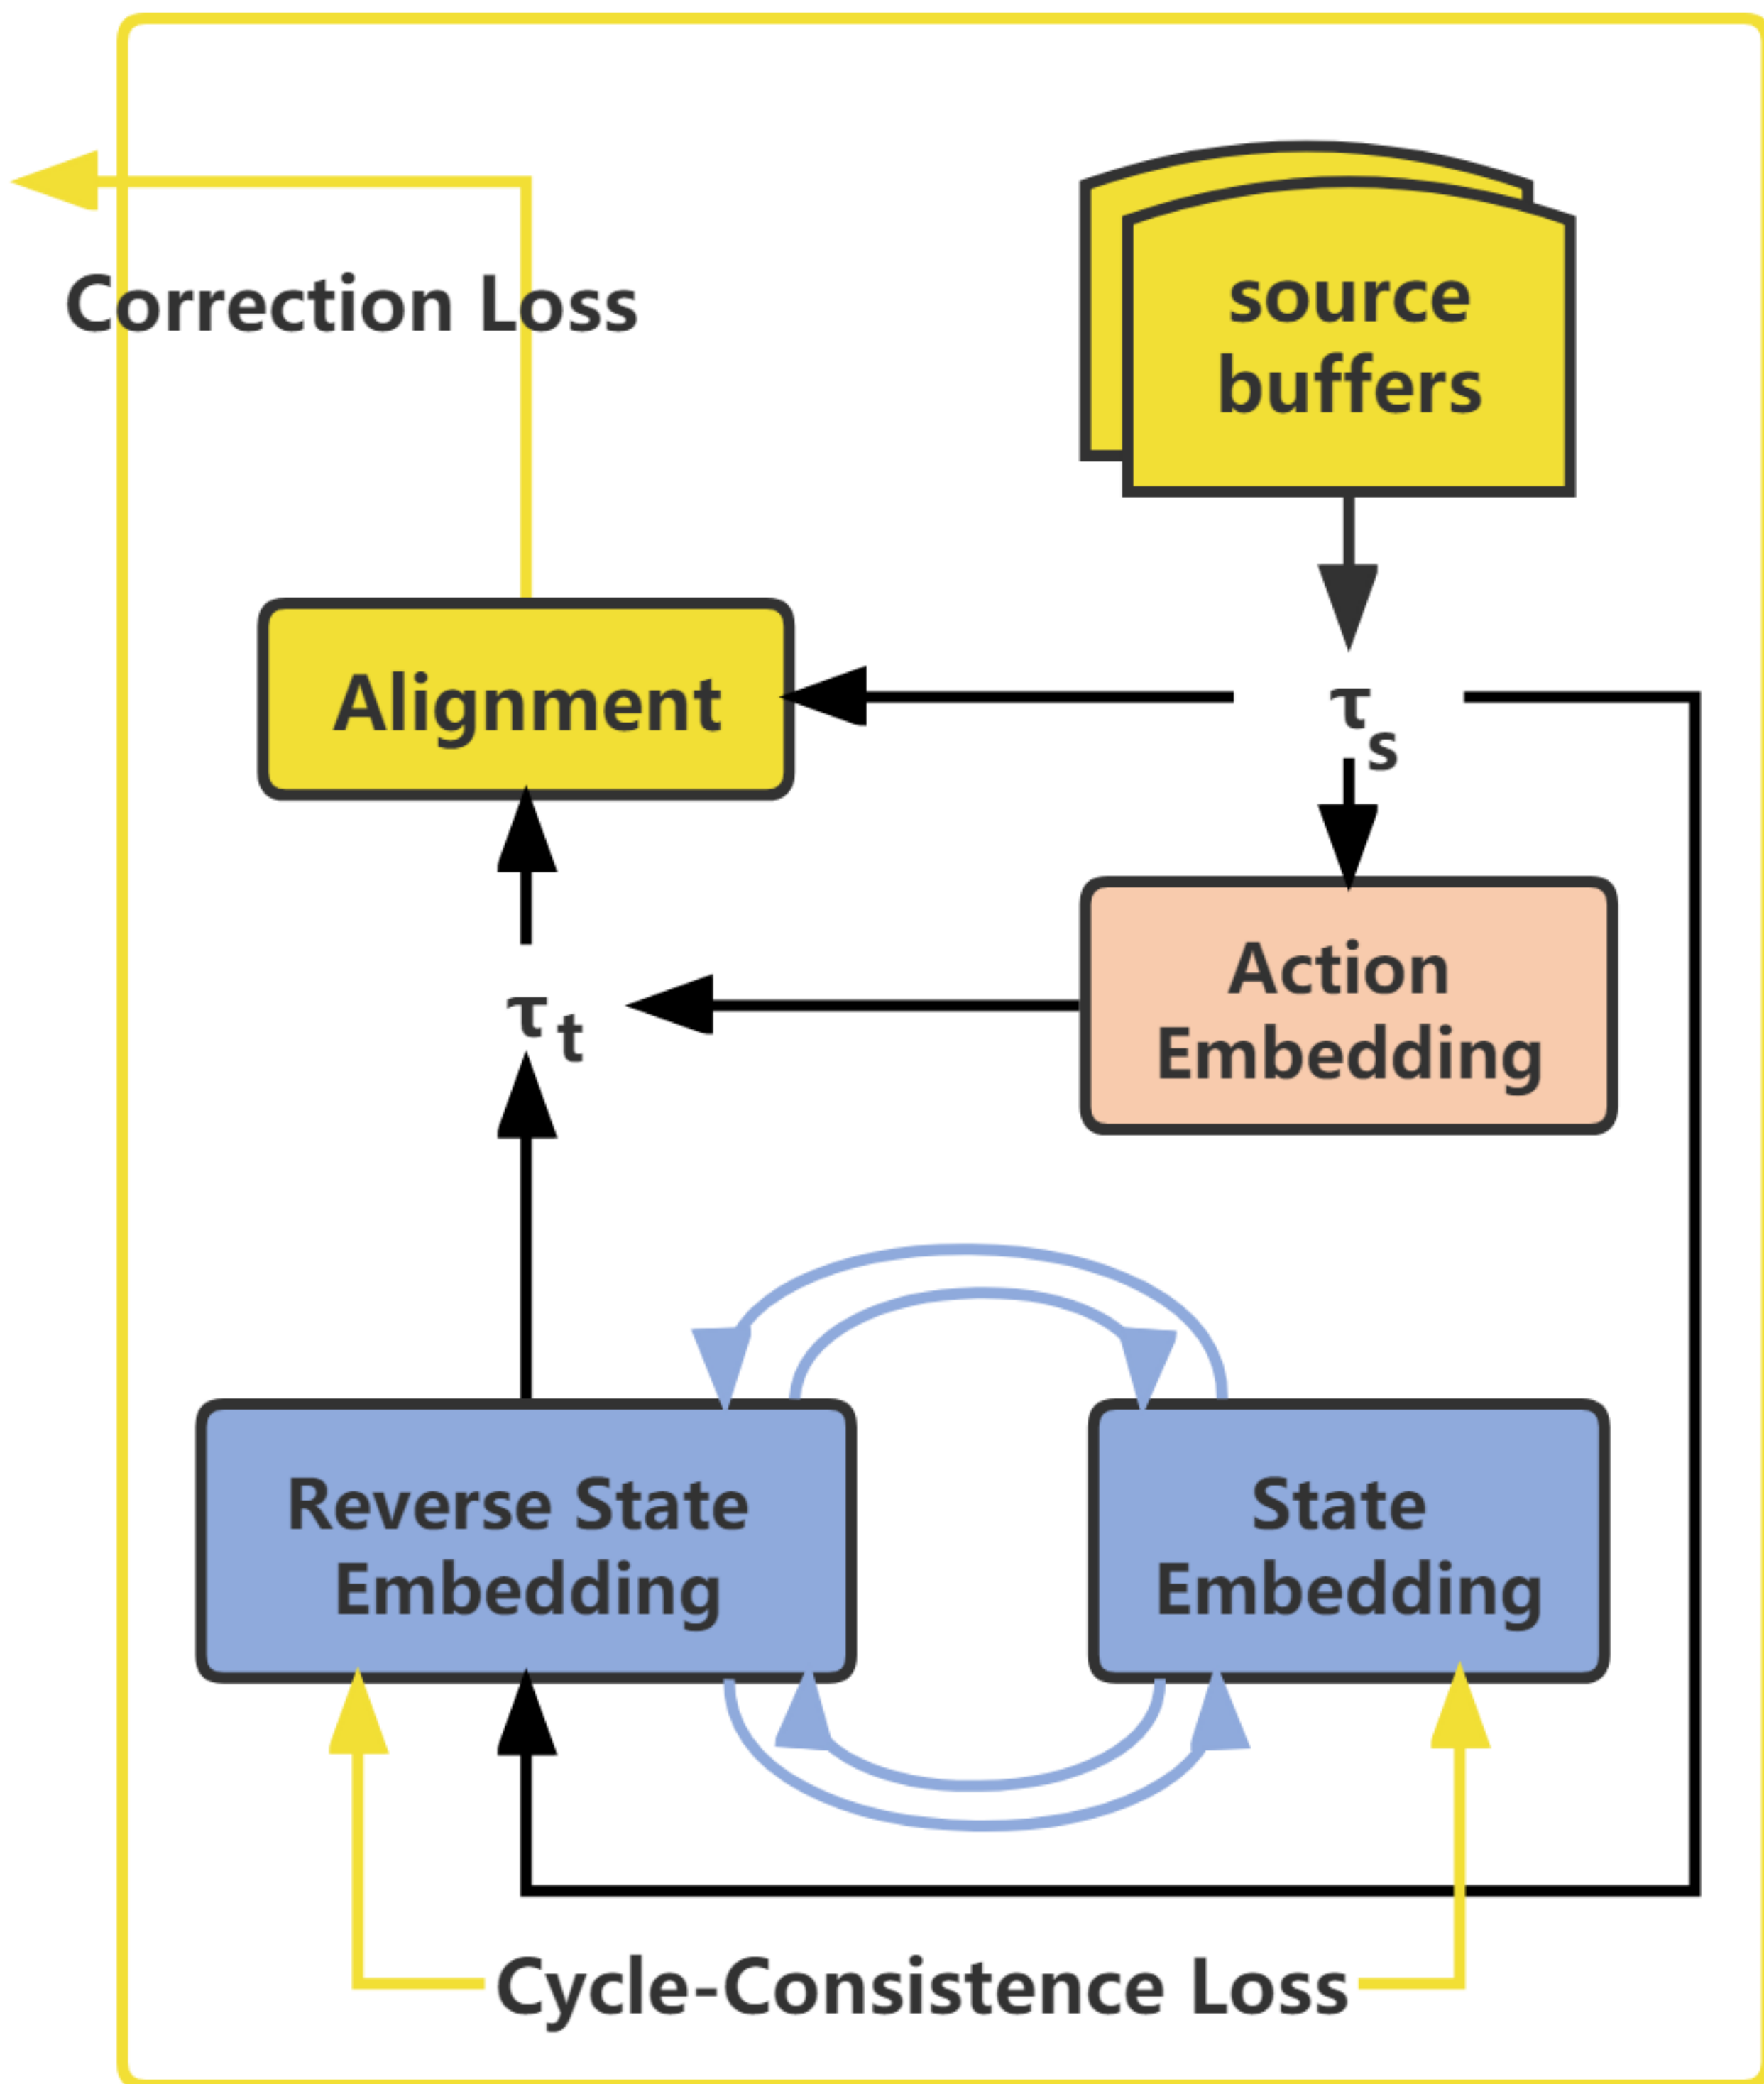

Supplement: supplementary_material [file attachment]

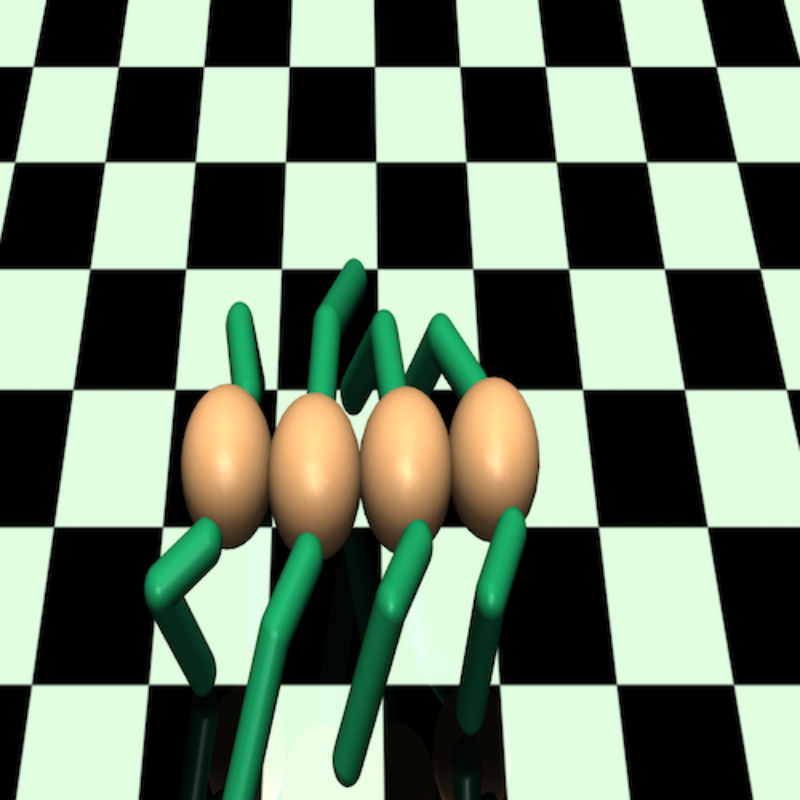

Supplement: supplementary_material [file attachment]

# Episode Rewards

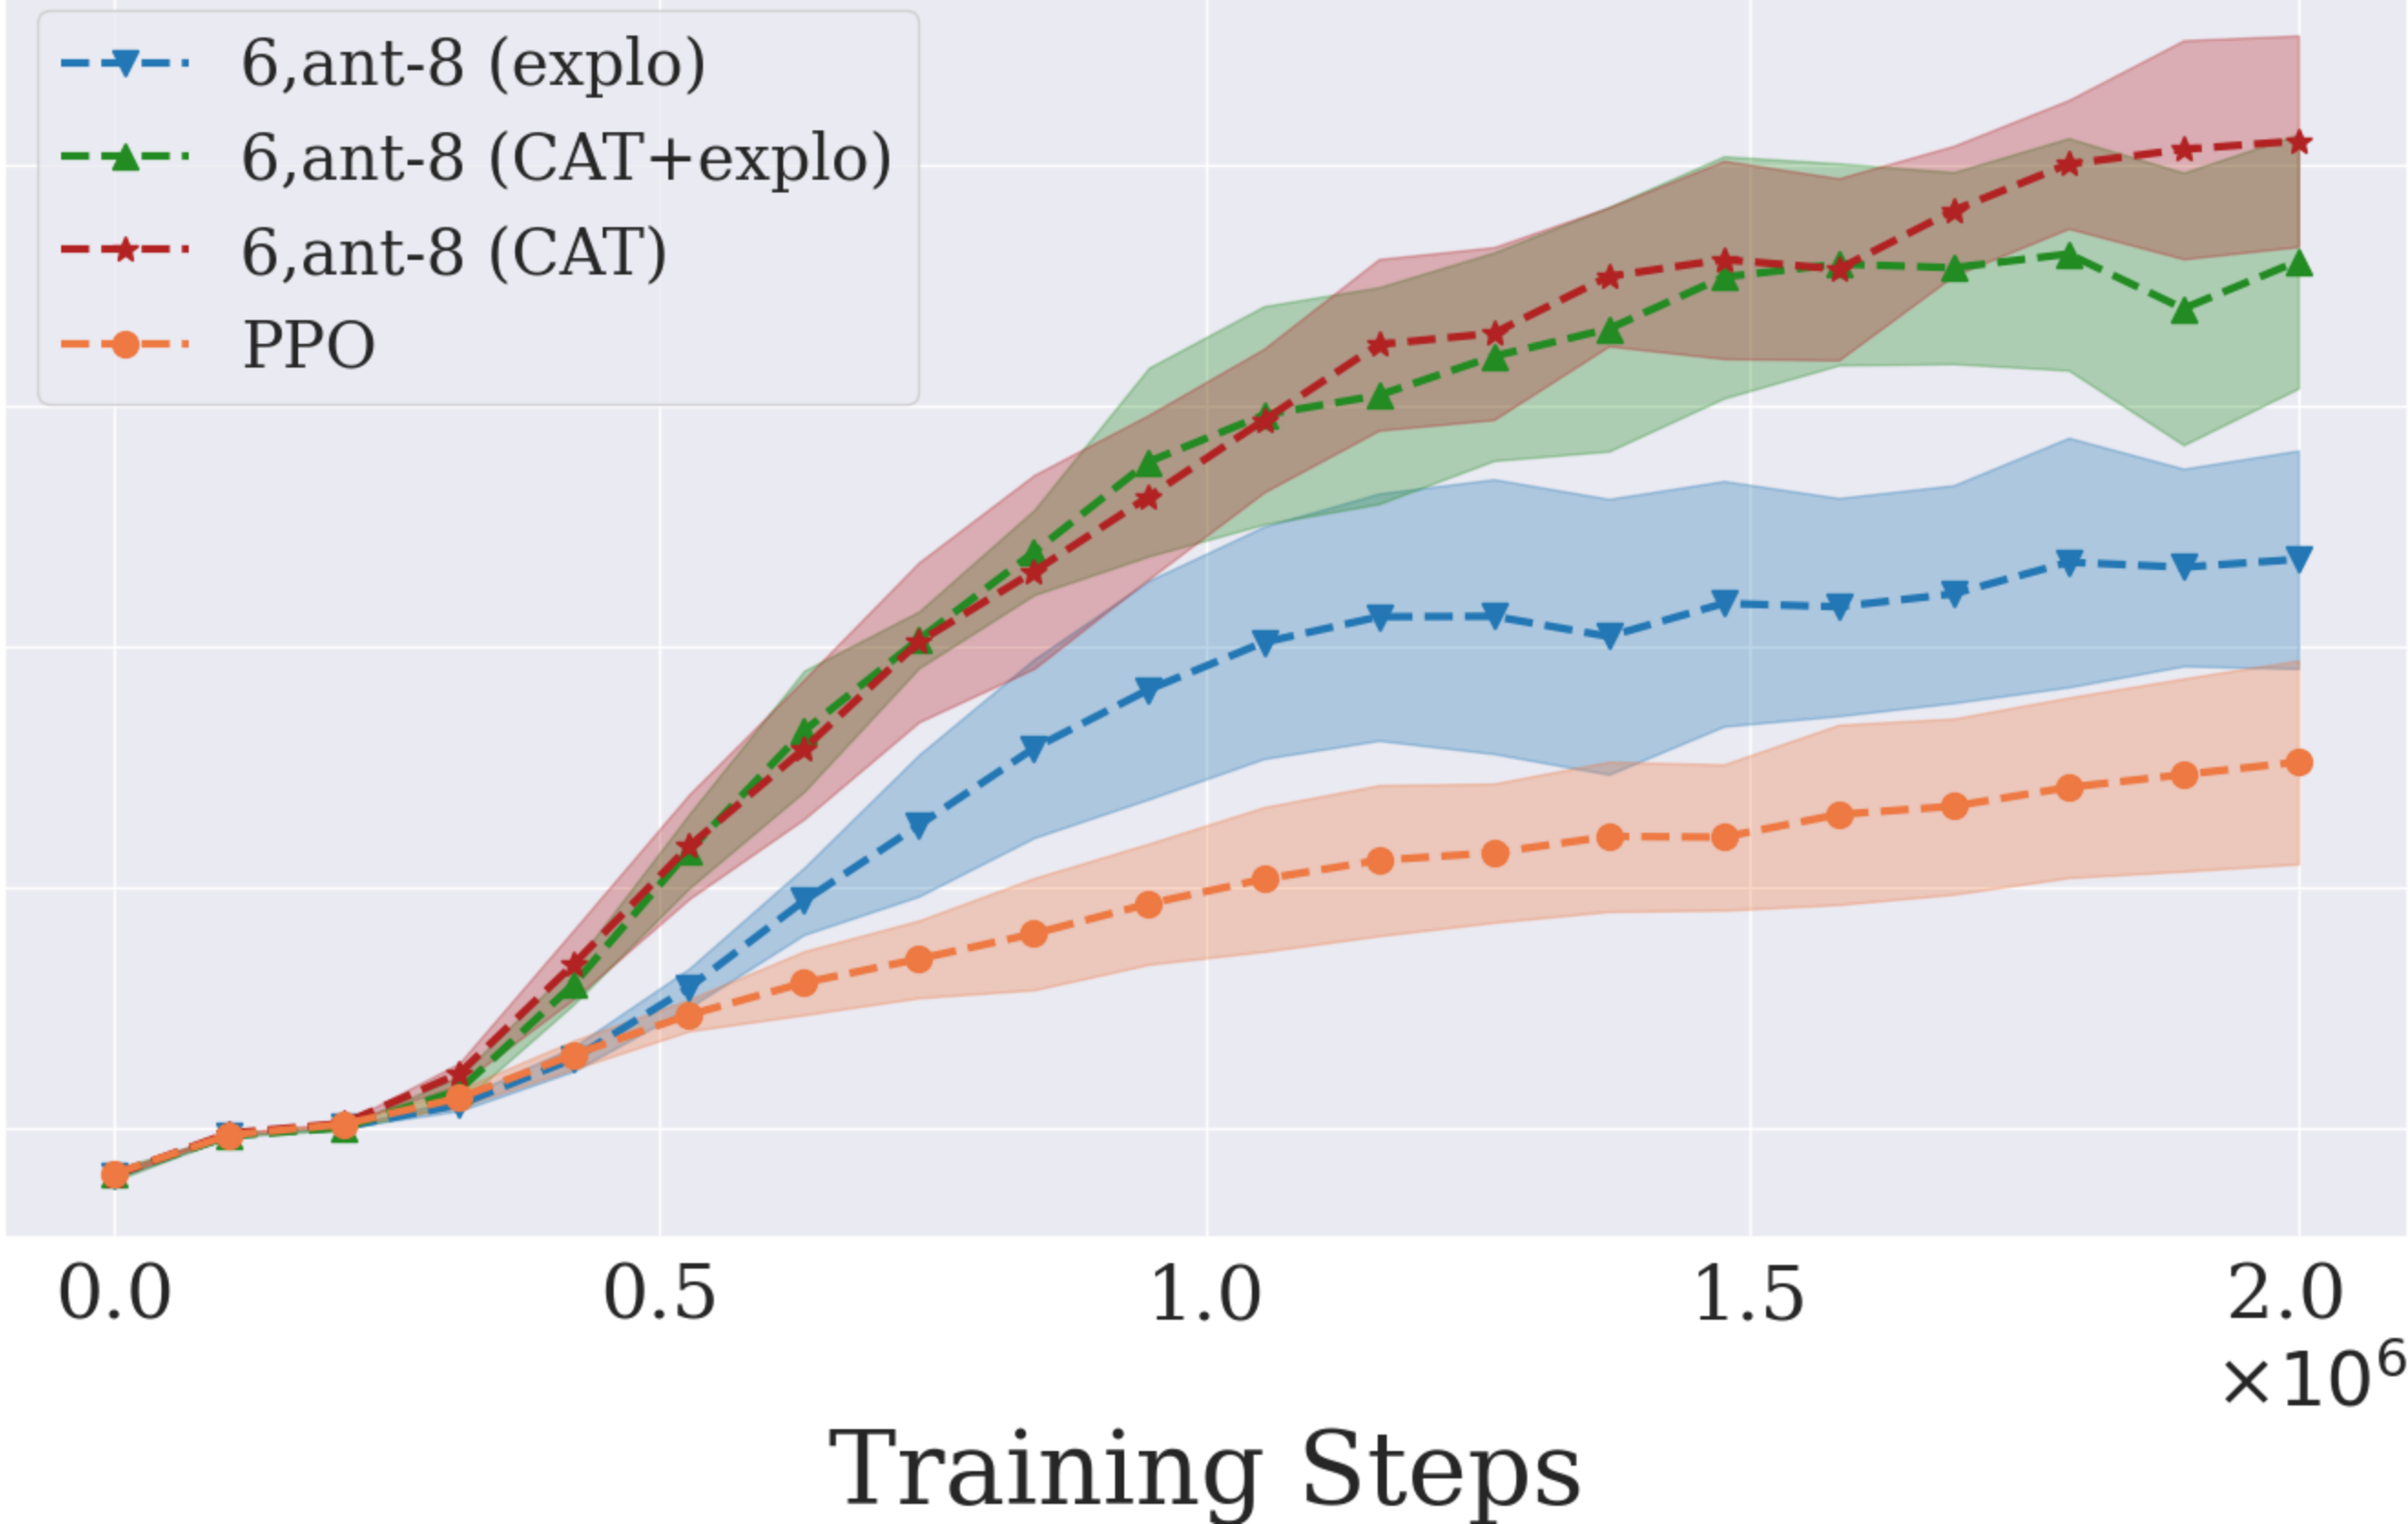

Supplement: supplementary_material [file attachment]

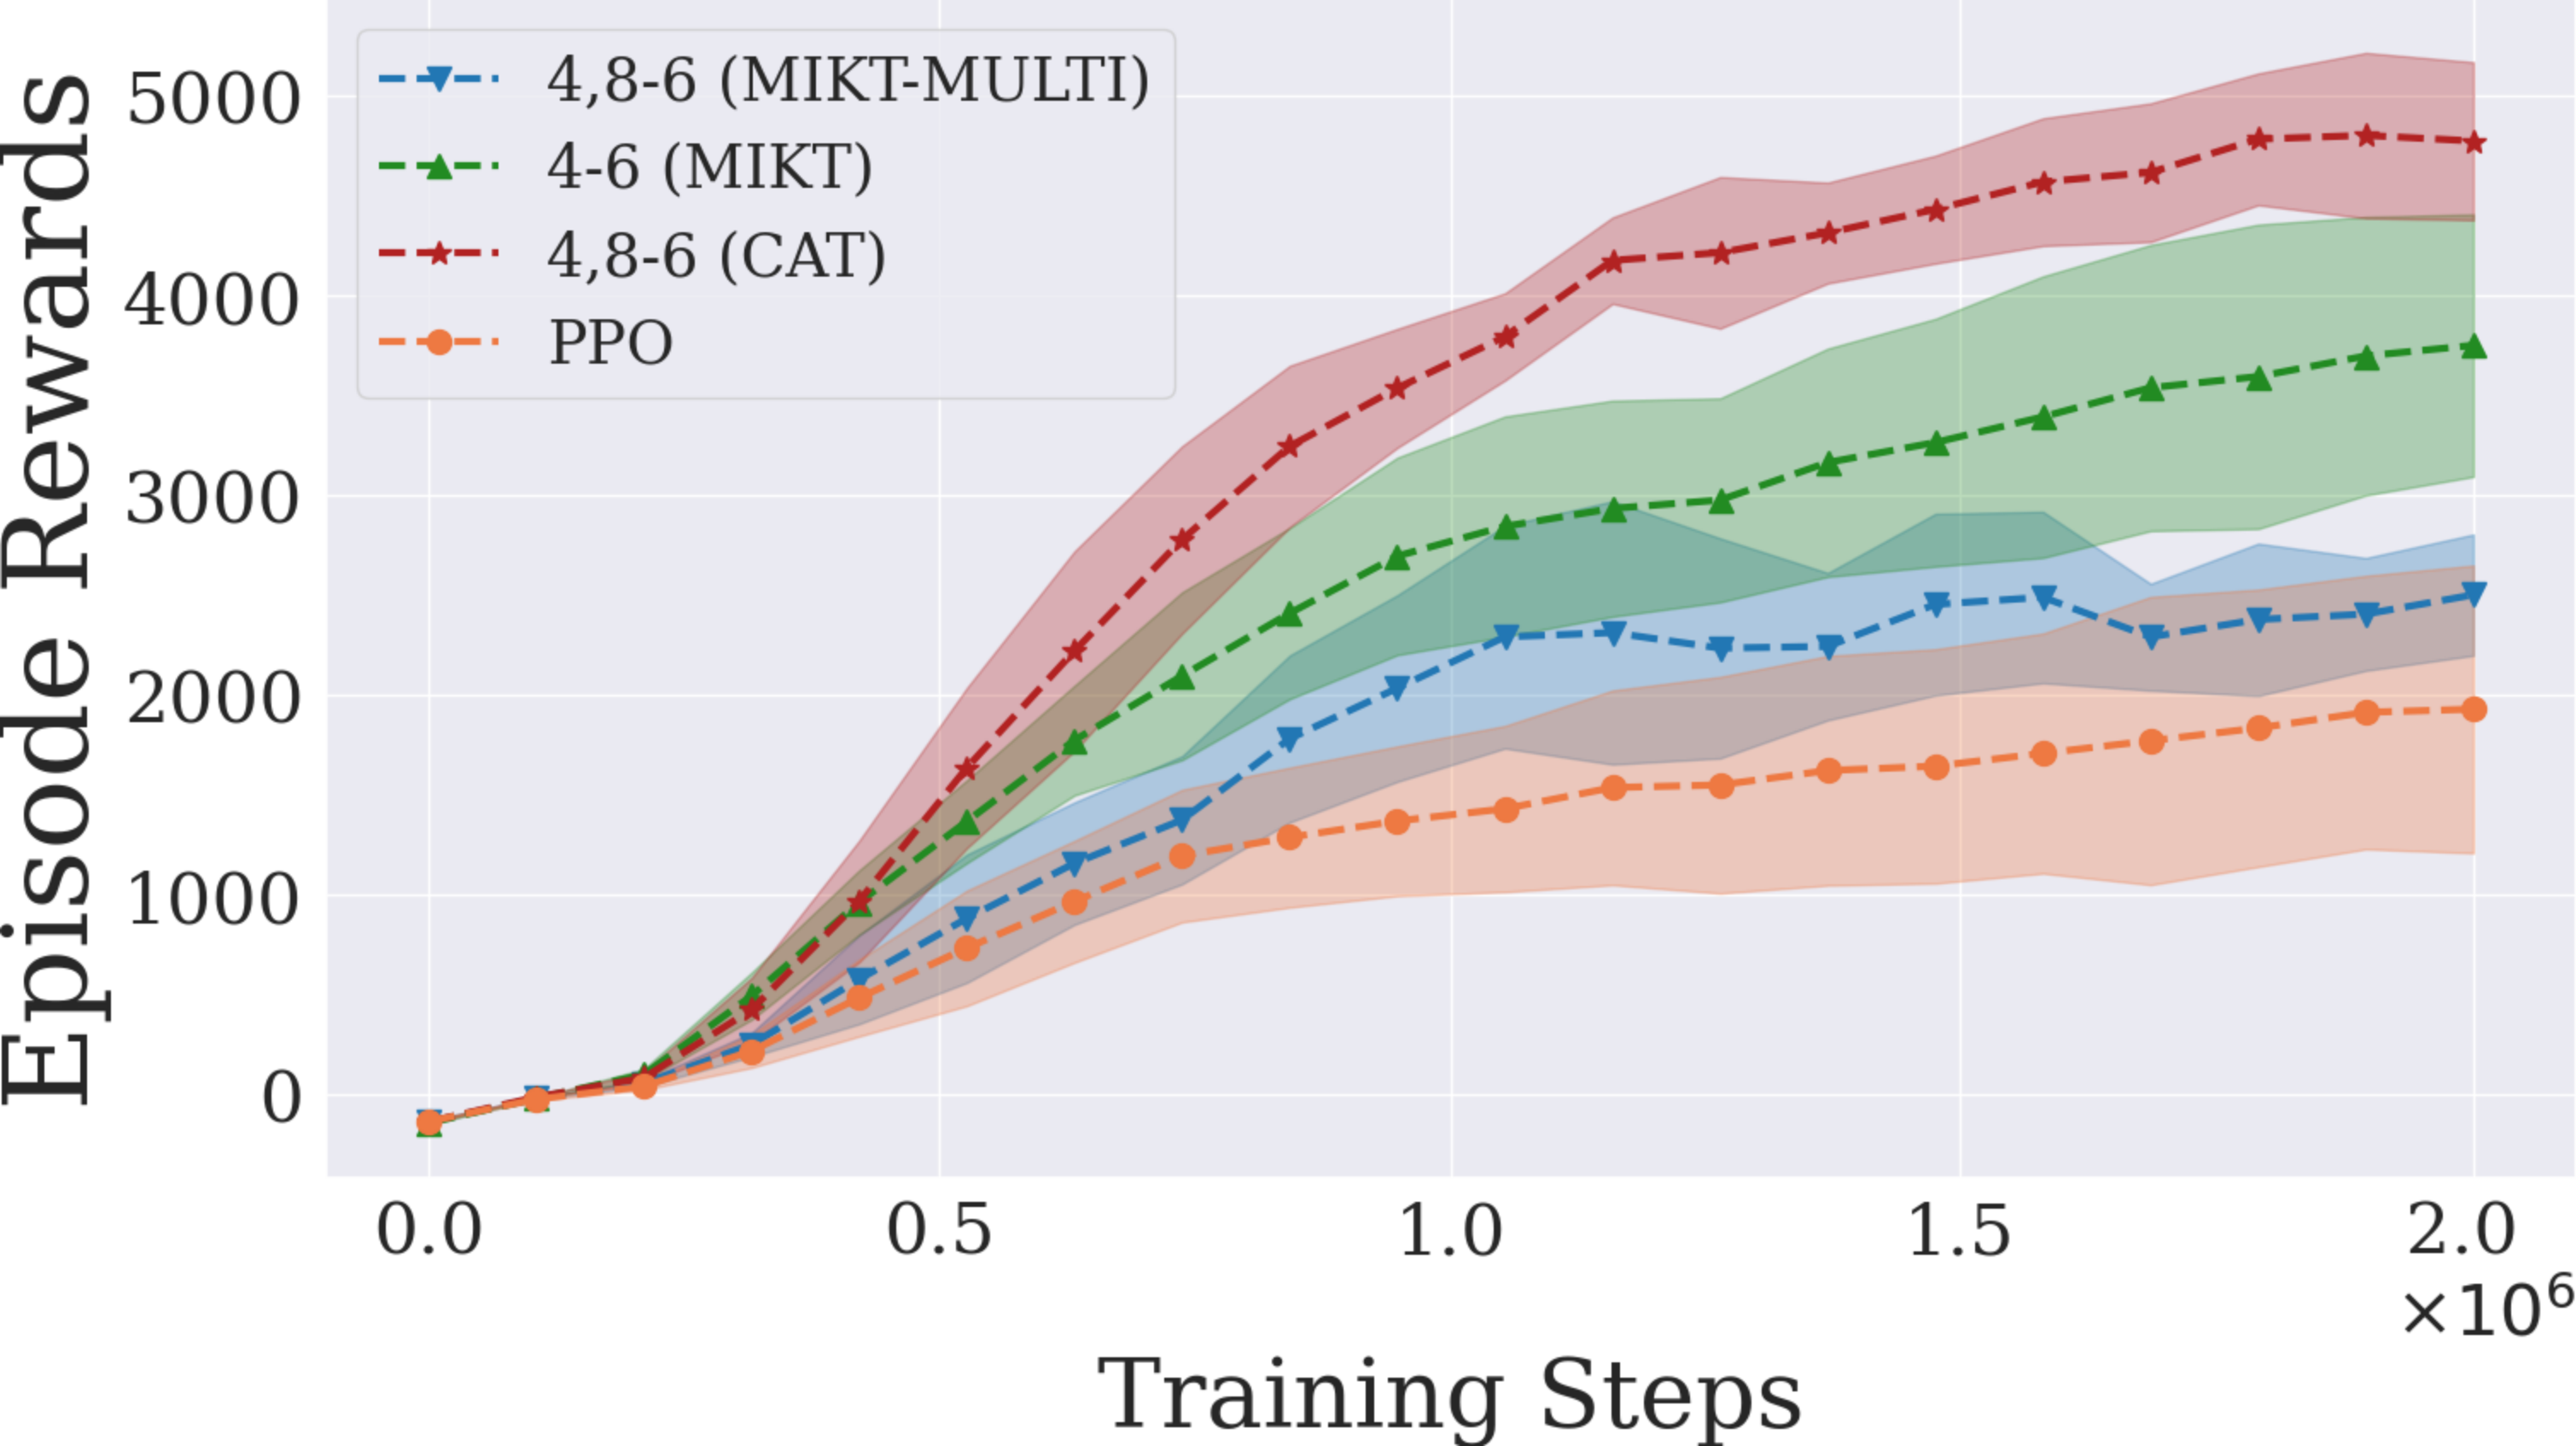

Supplement: supplementary_material [file attachment]

Episode Rewards

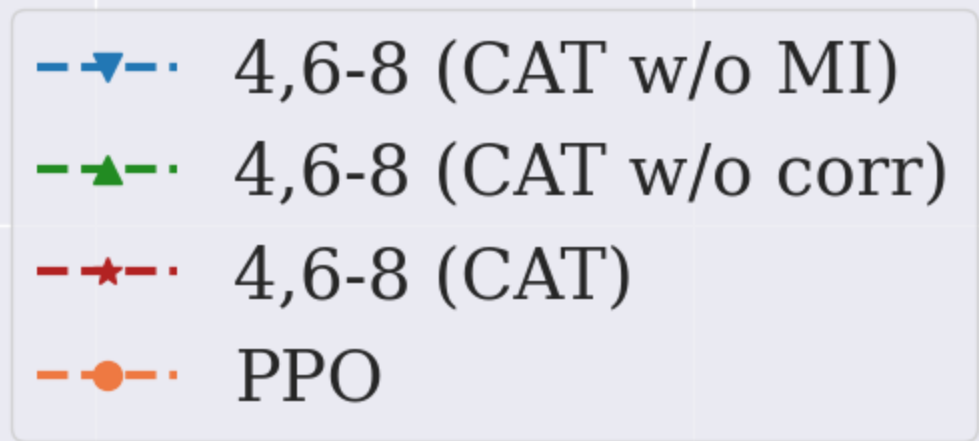

Training Steps

$\times 10^6$

Supplement: supplementary_material [file attachment]

Episode Rewards

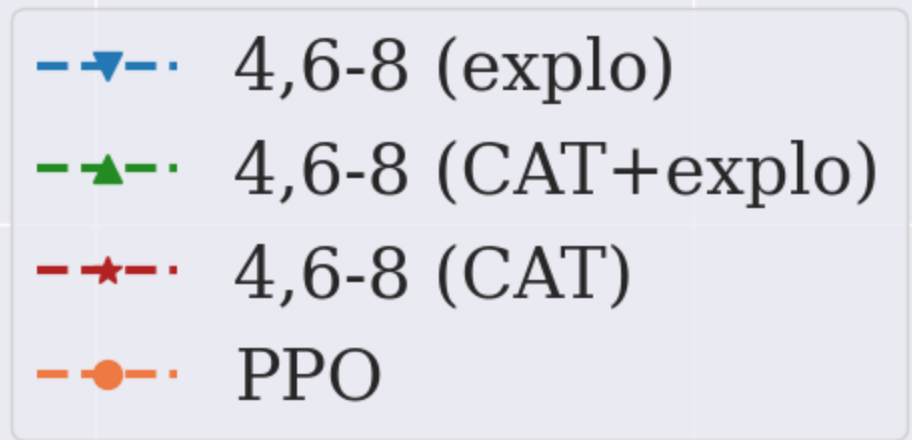

Training Steps

$\times 10^6$

Supplement: supplementary_material [file attachment]

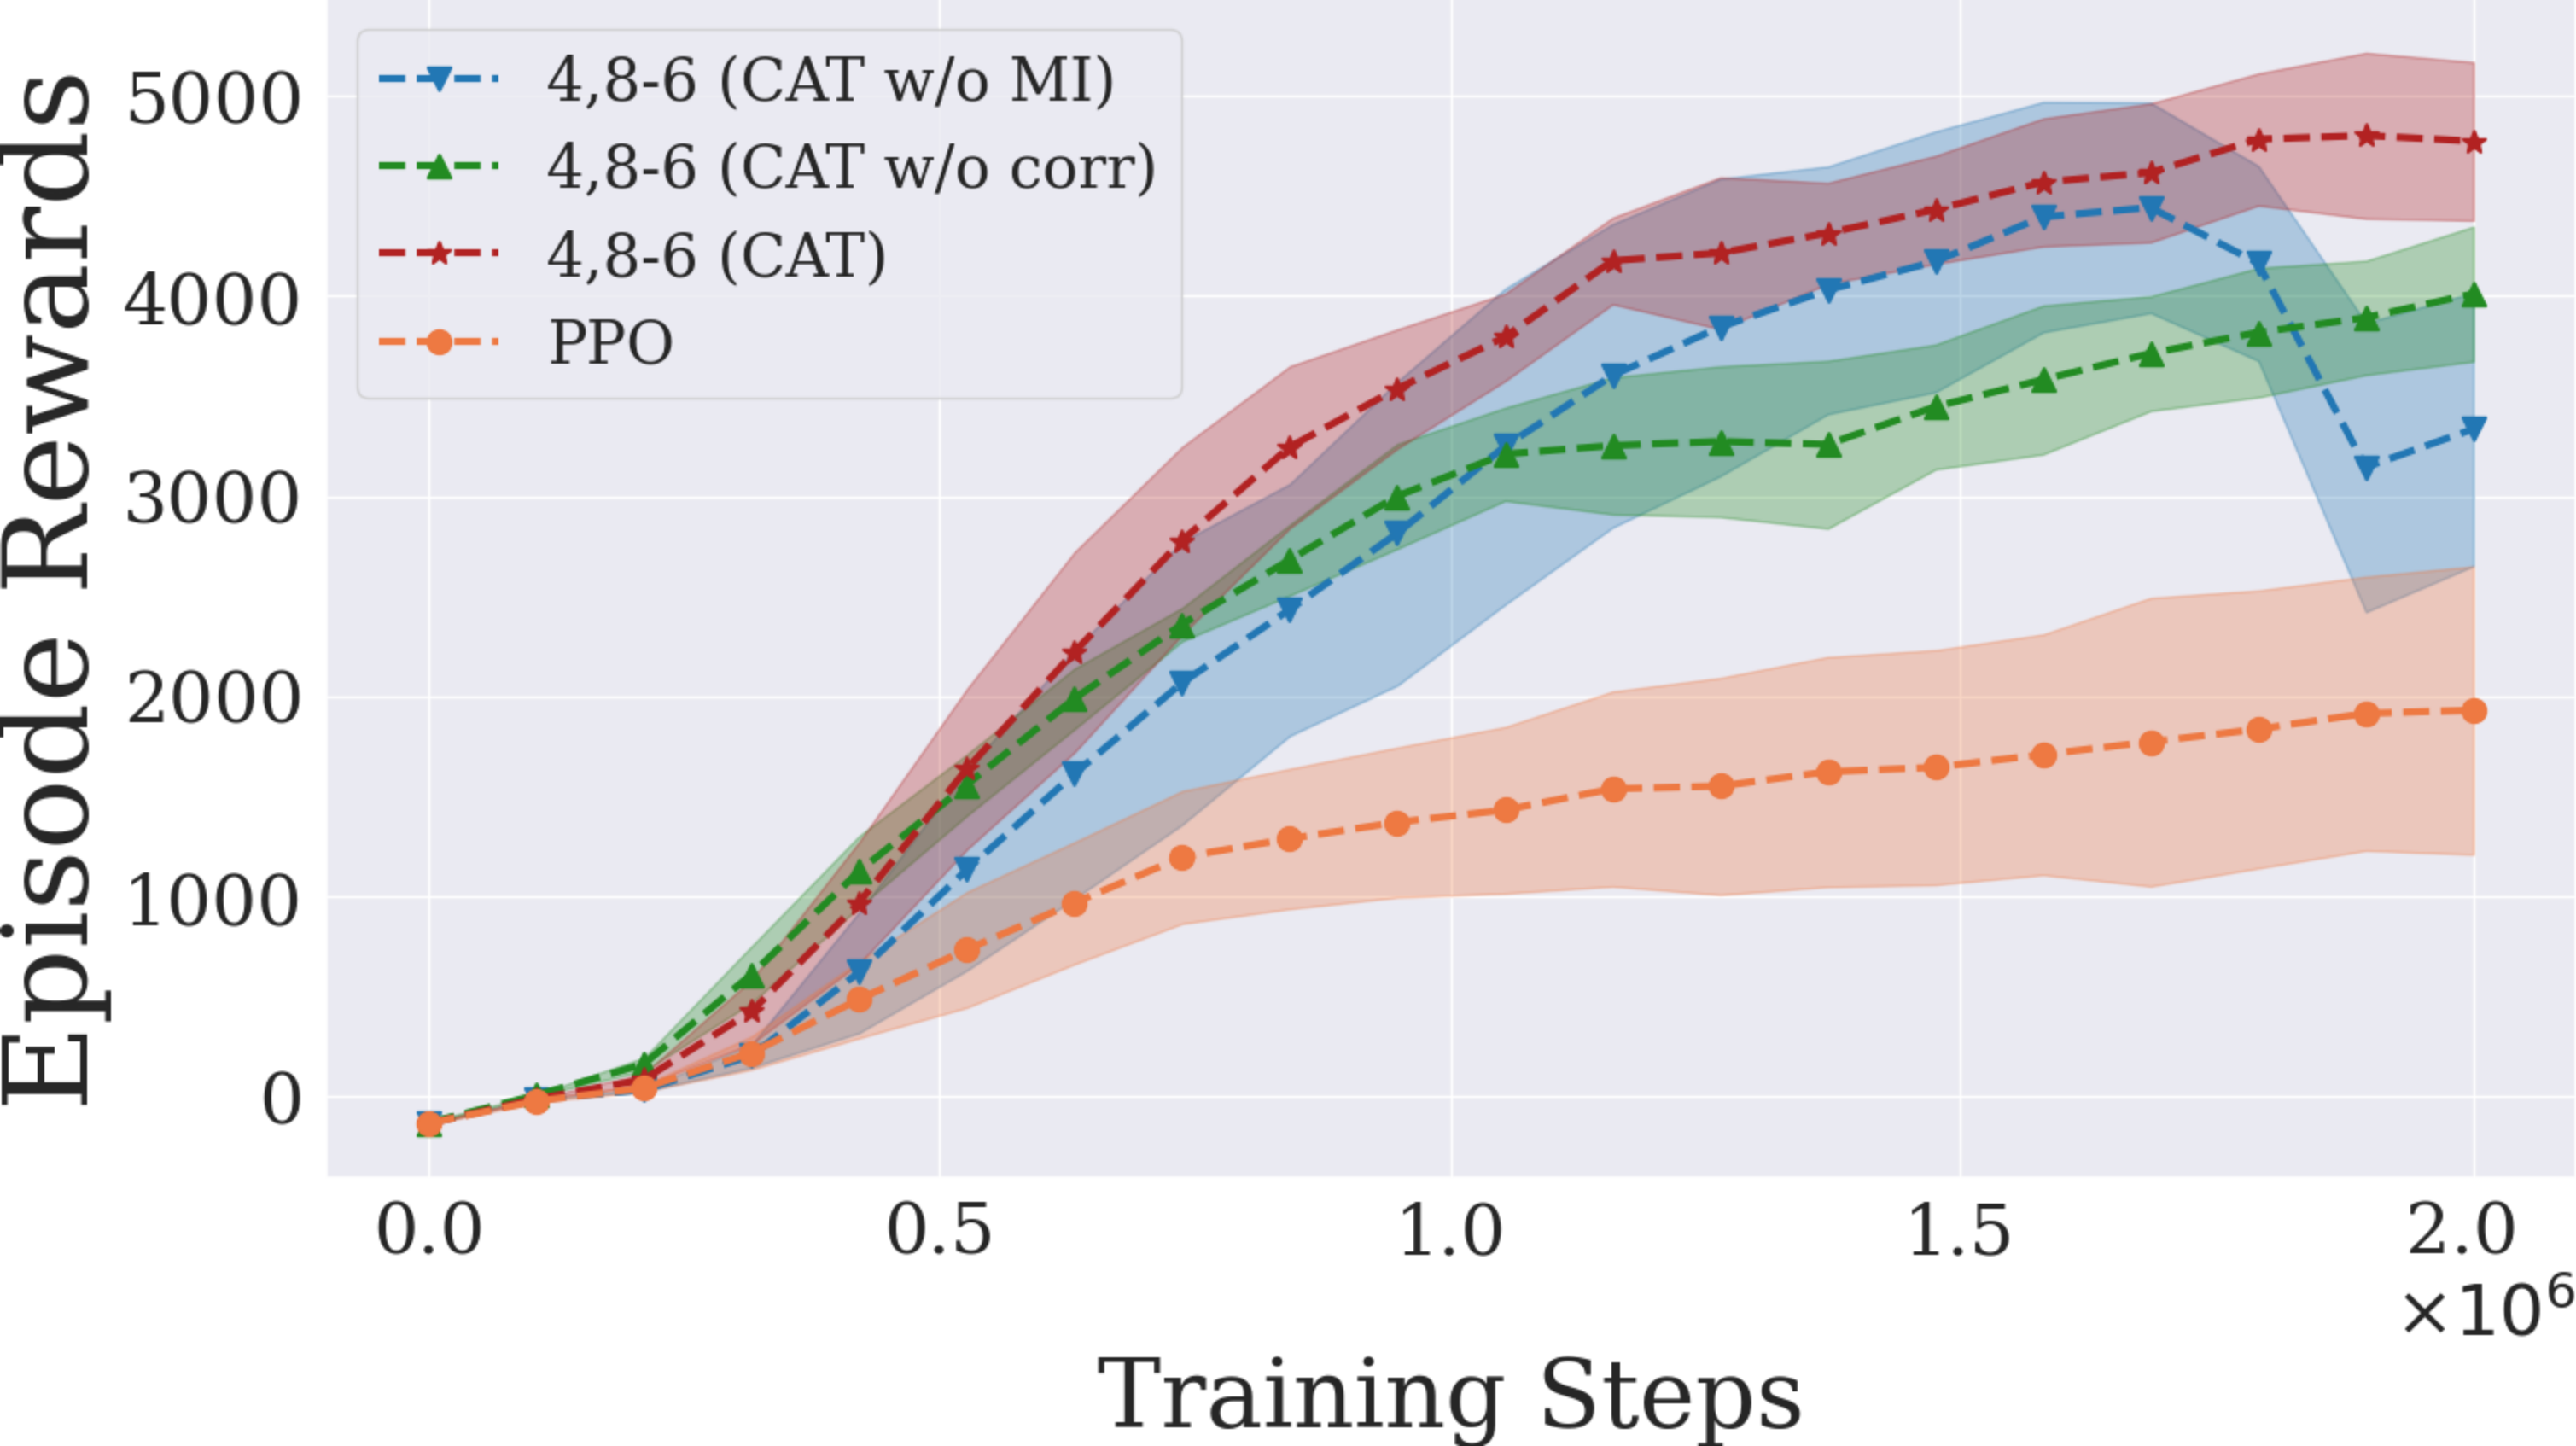

Supplement: supplementary_material [file attachment]

Episode Rewards

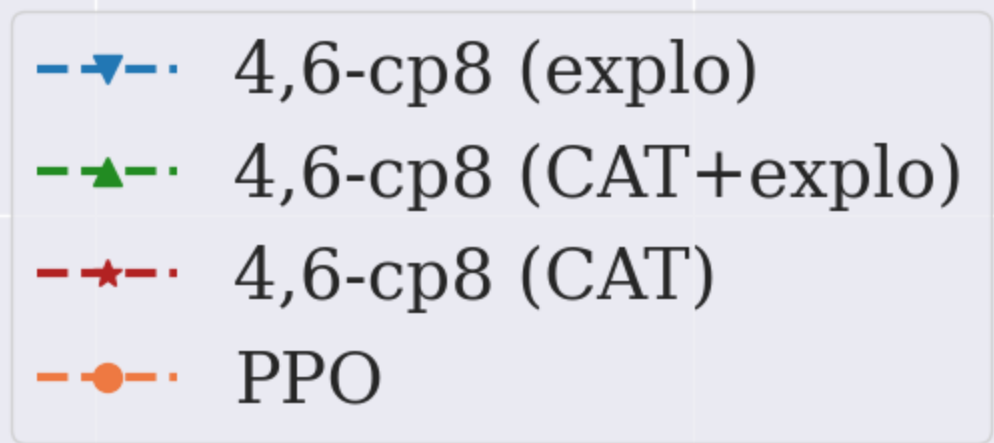

Training Steps

$\times 10^6$

Supplement: supplementary_material [file attachment]

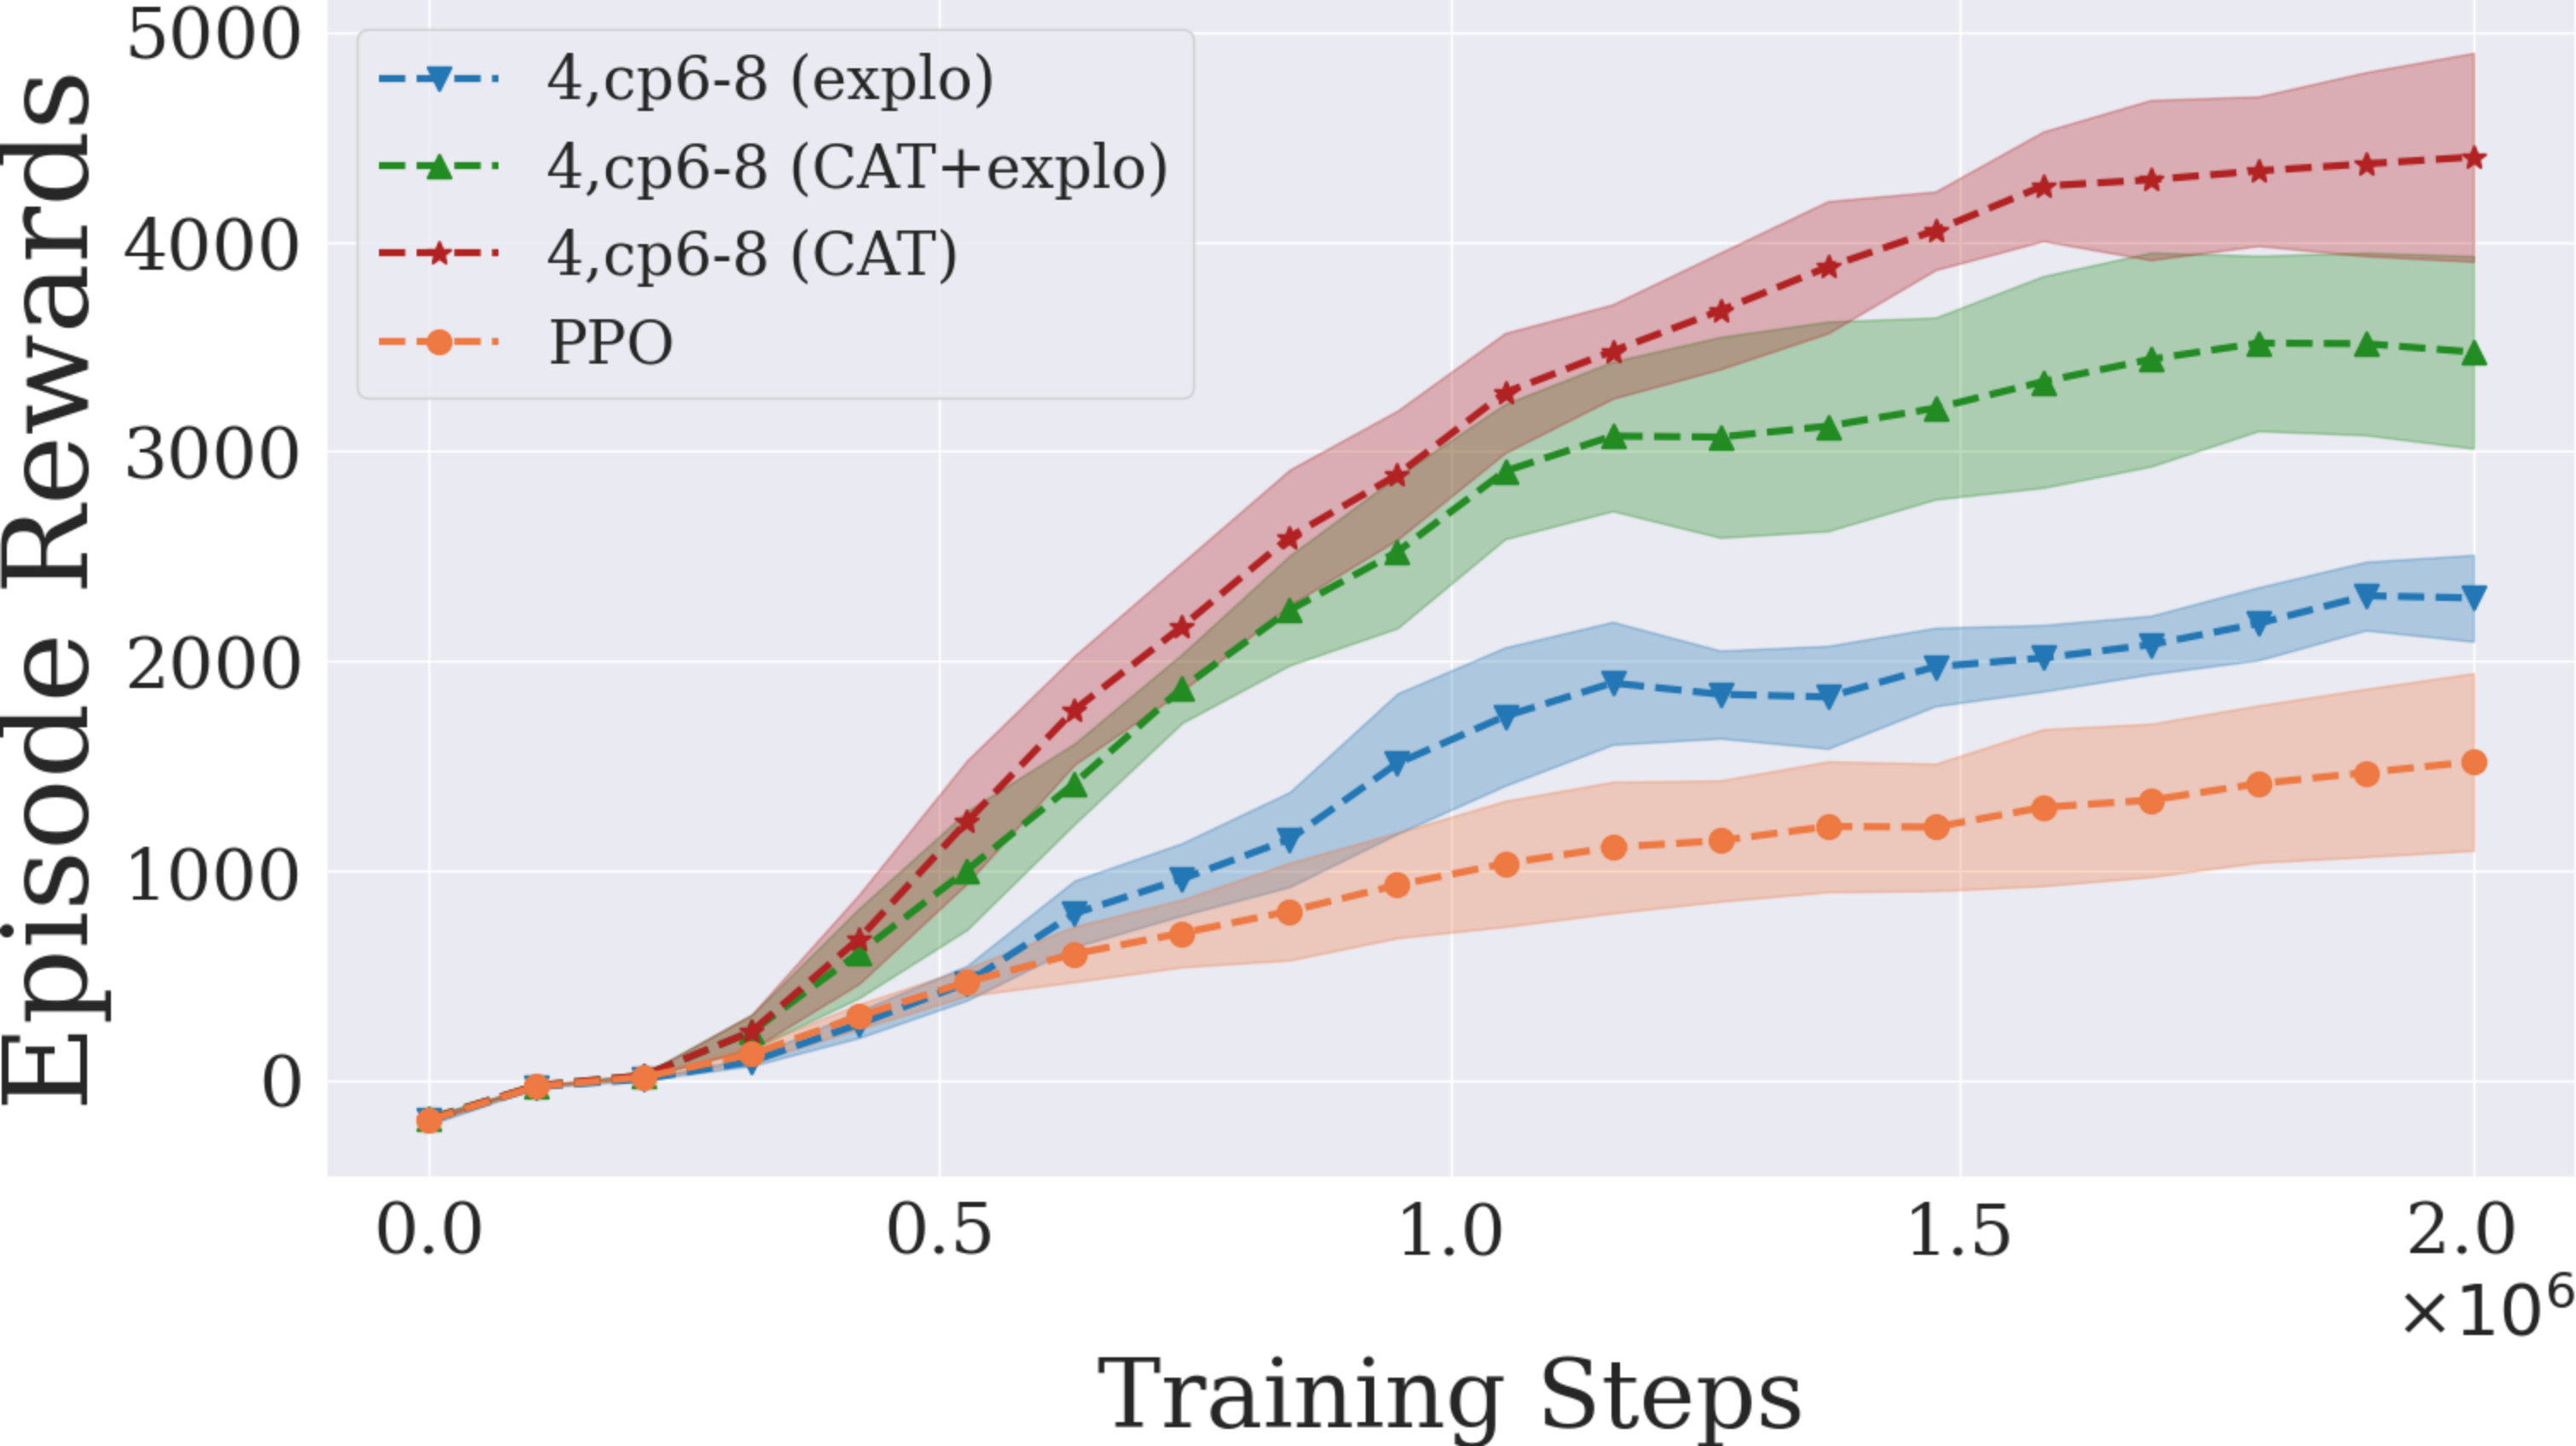

Supplement: supplementary_material [file attachment]

Episode Rewards

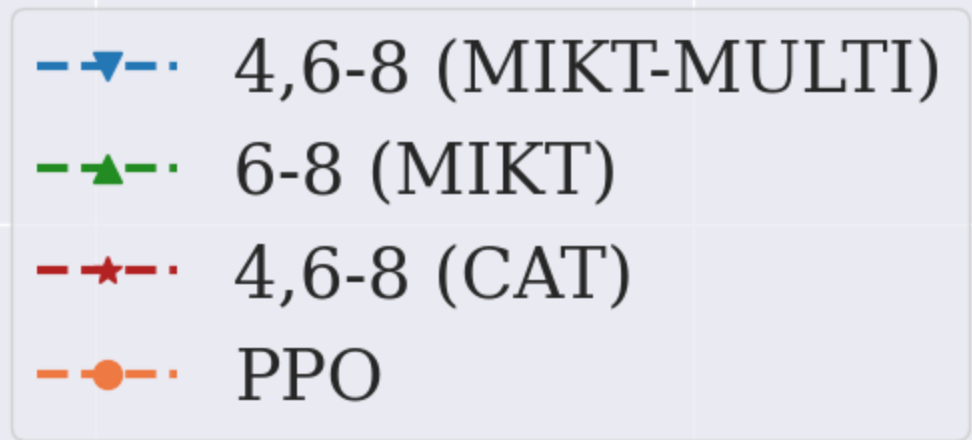

Training Steps

$\times 10^6$

Supplement: supplementary_material [file attachment]

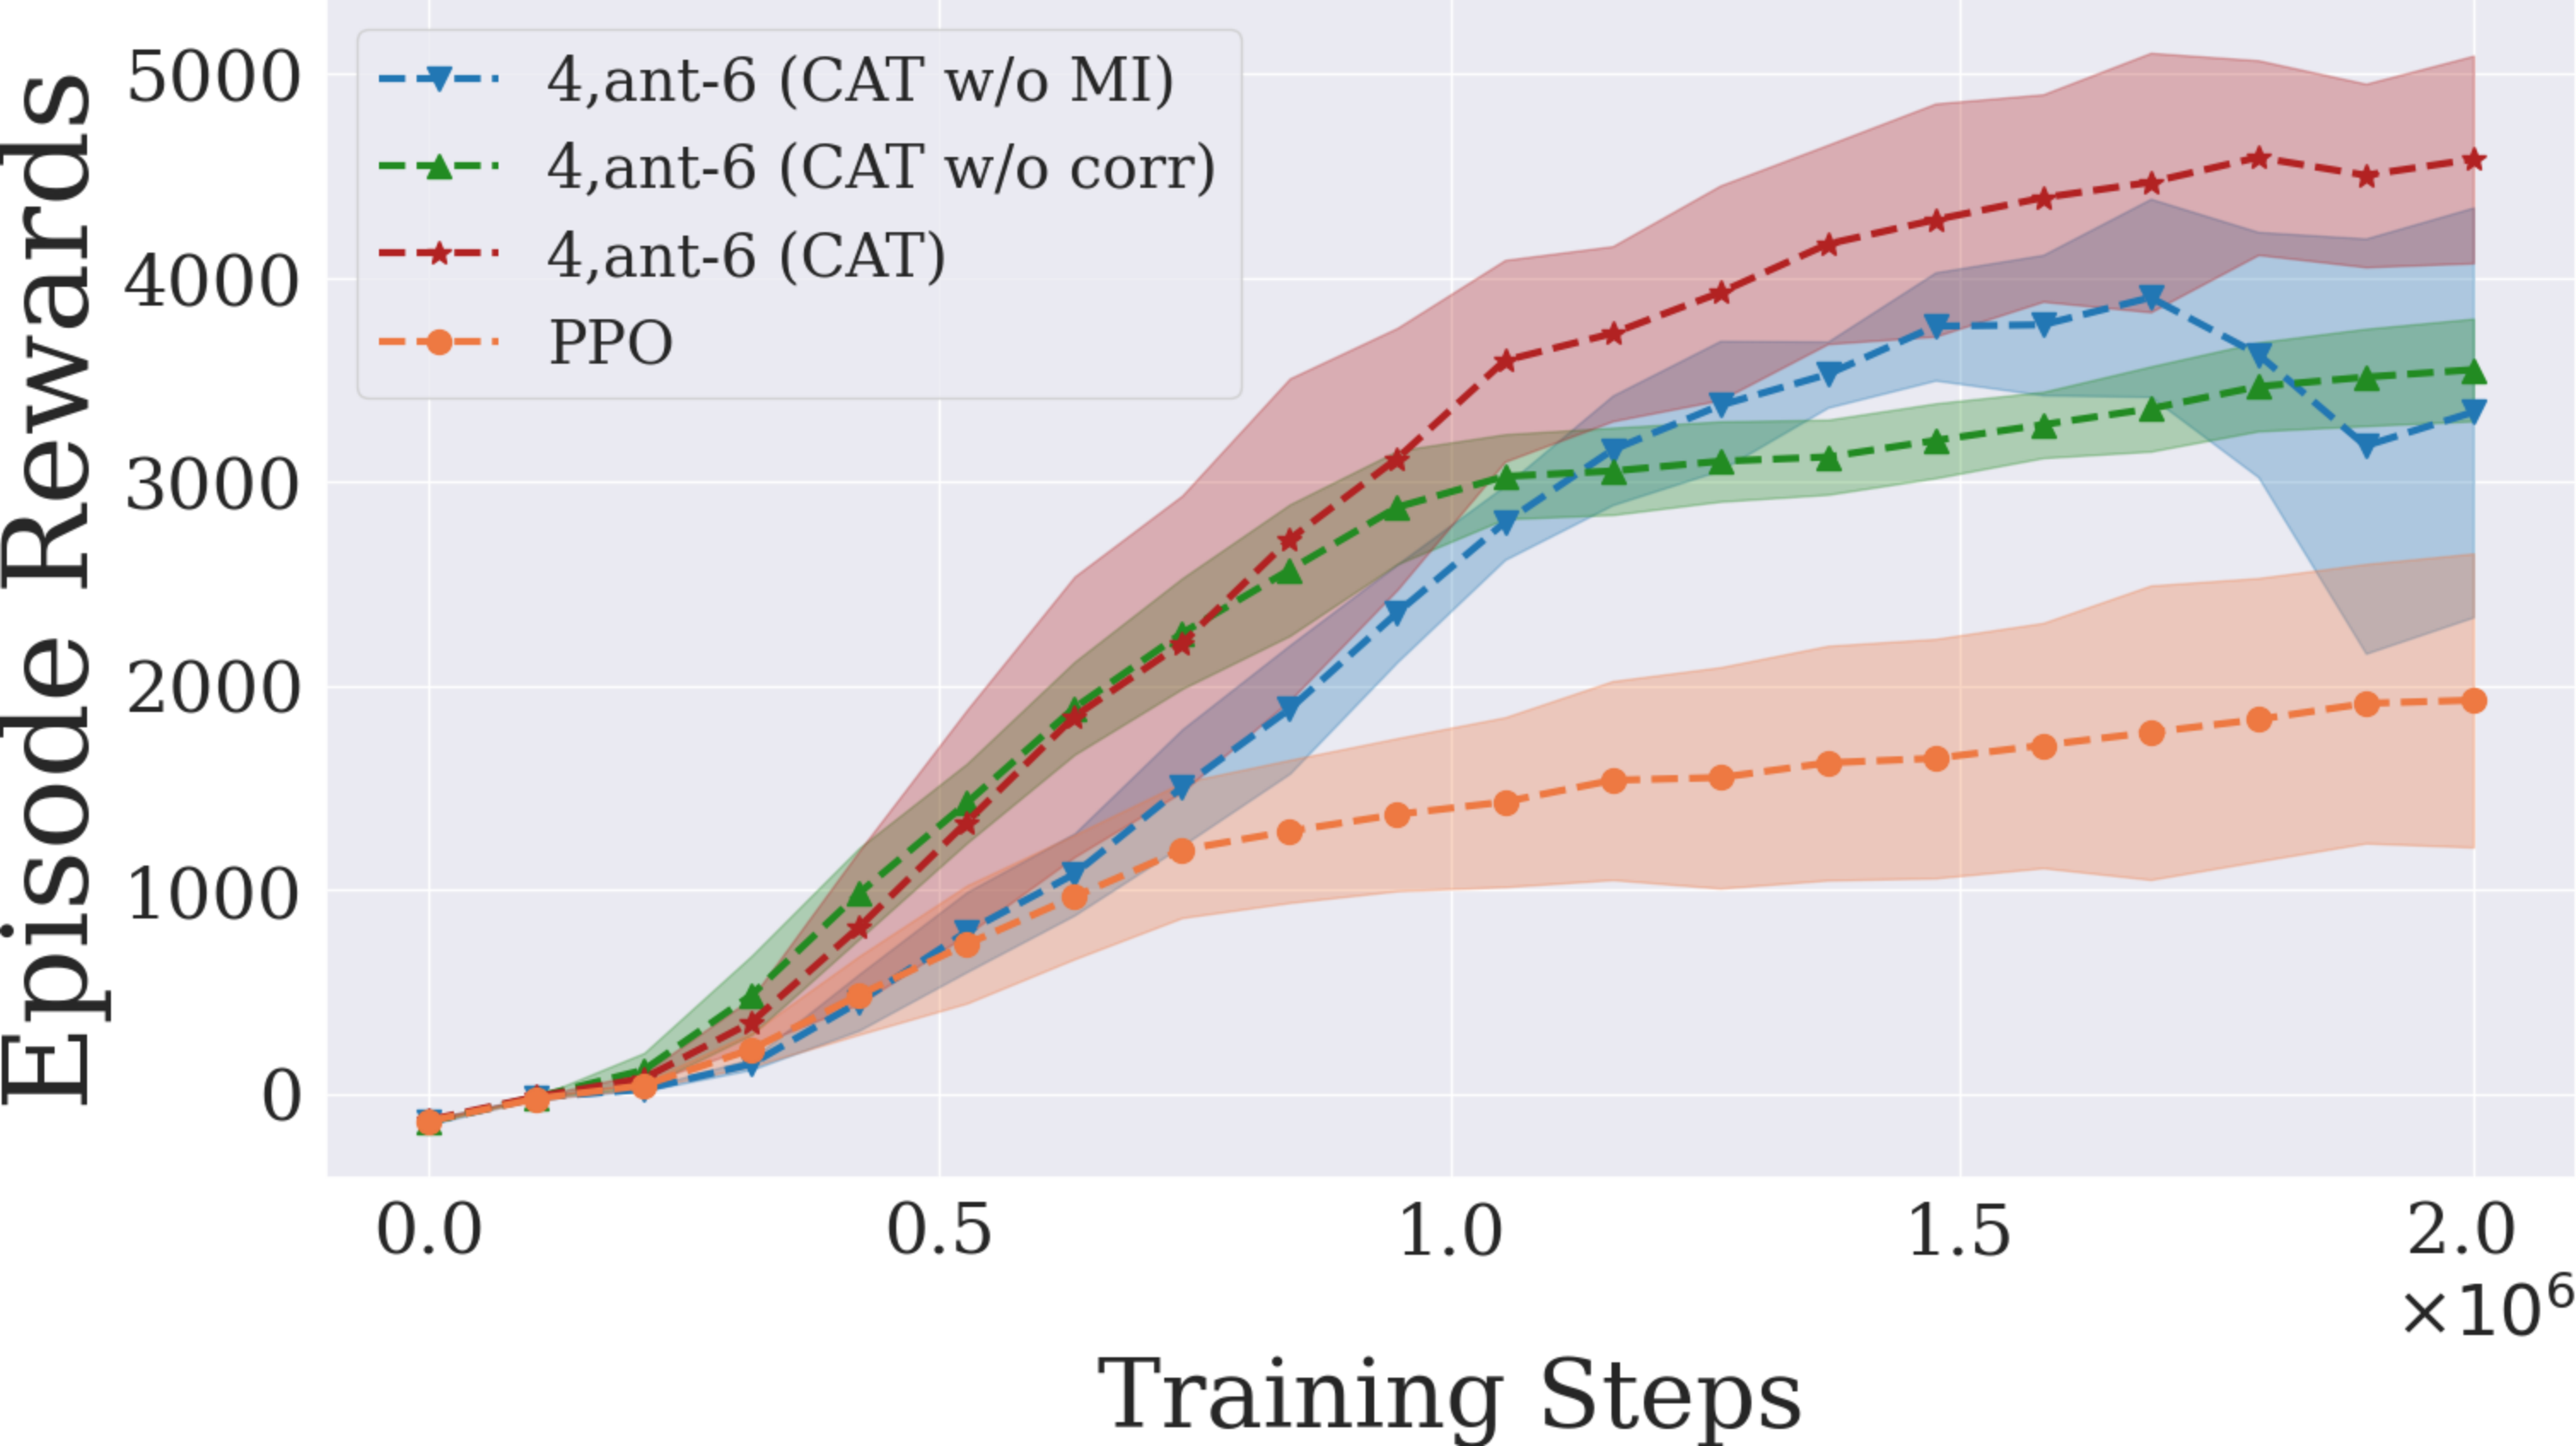

Supplement: supplementary_material [file attachment]

Episode Rewards

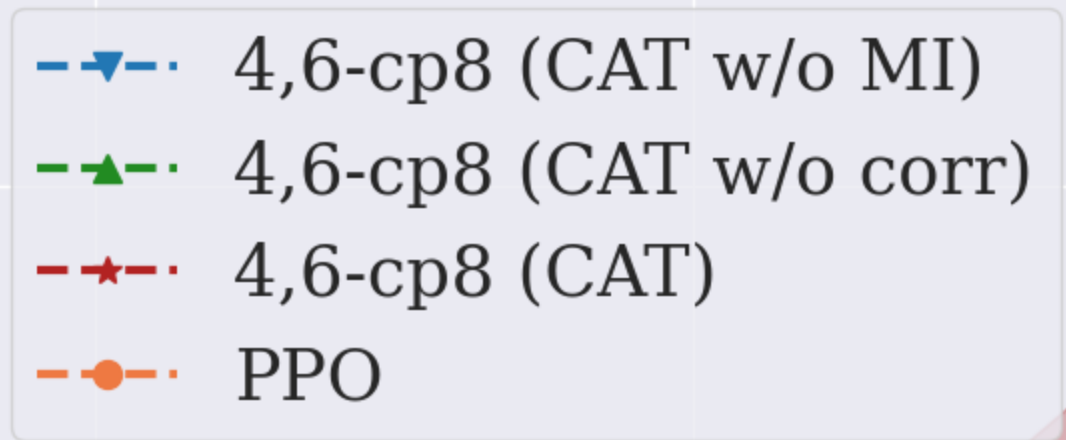

Training Steps

$\times 10^6$

Supplement: supplementary_material [file attachment]

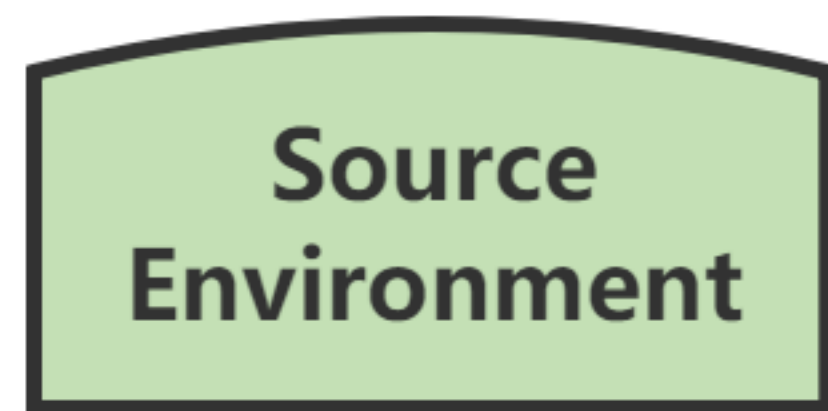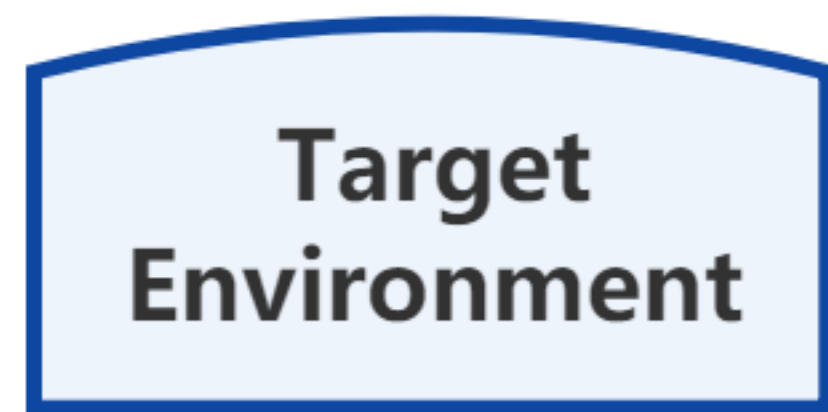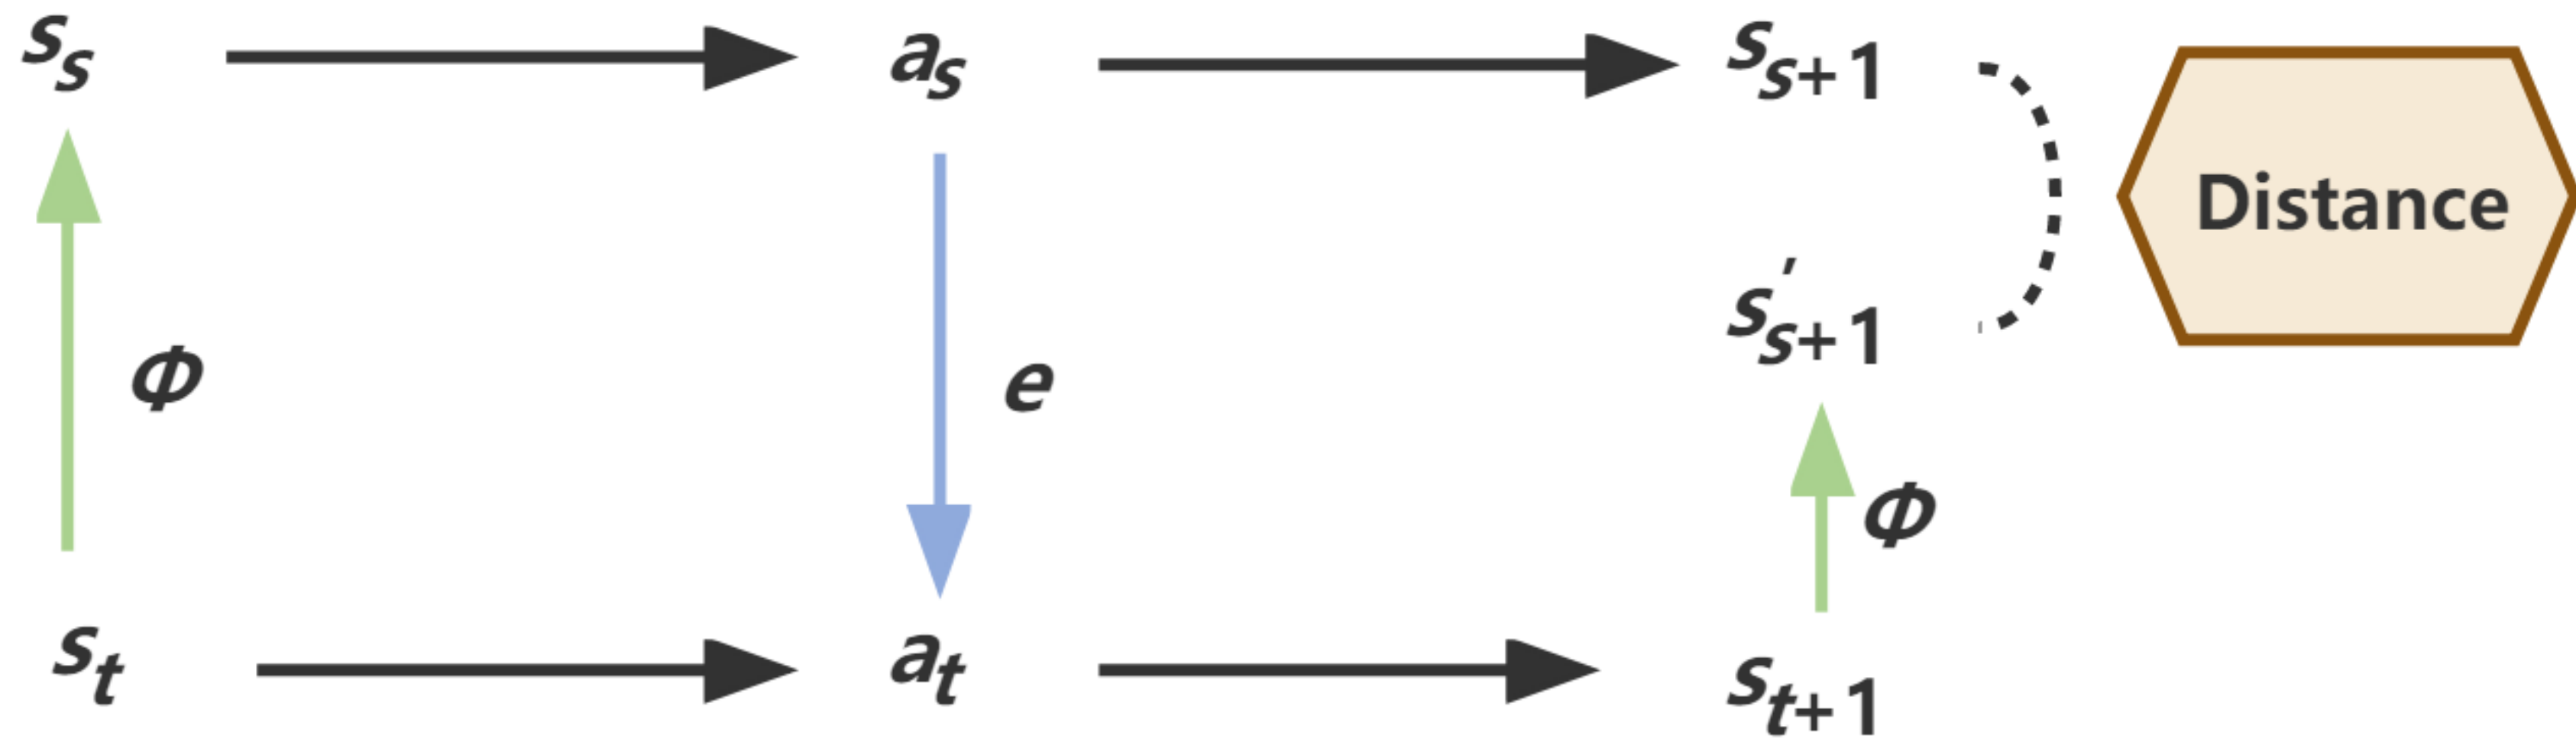

Supplement: supplementary_material [file attachment]

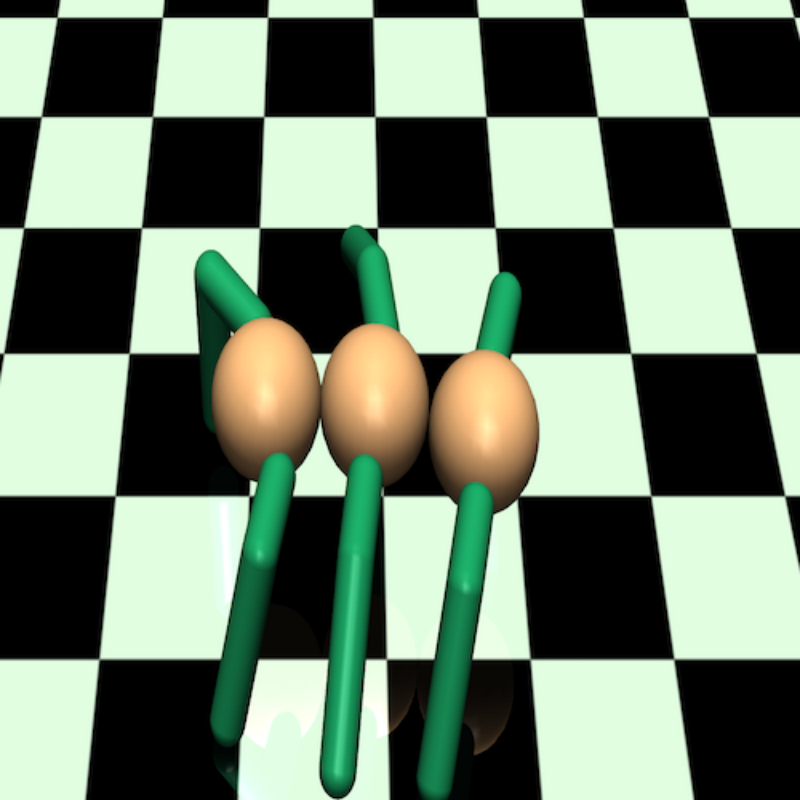

Supplement: supplementary_material [file attachment]

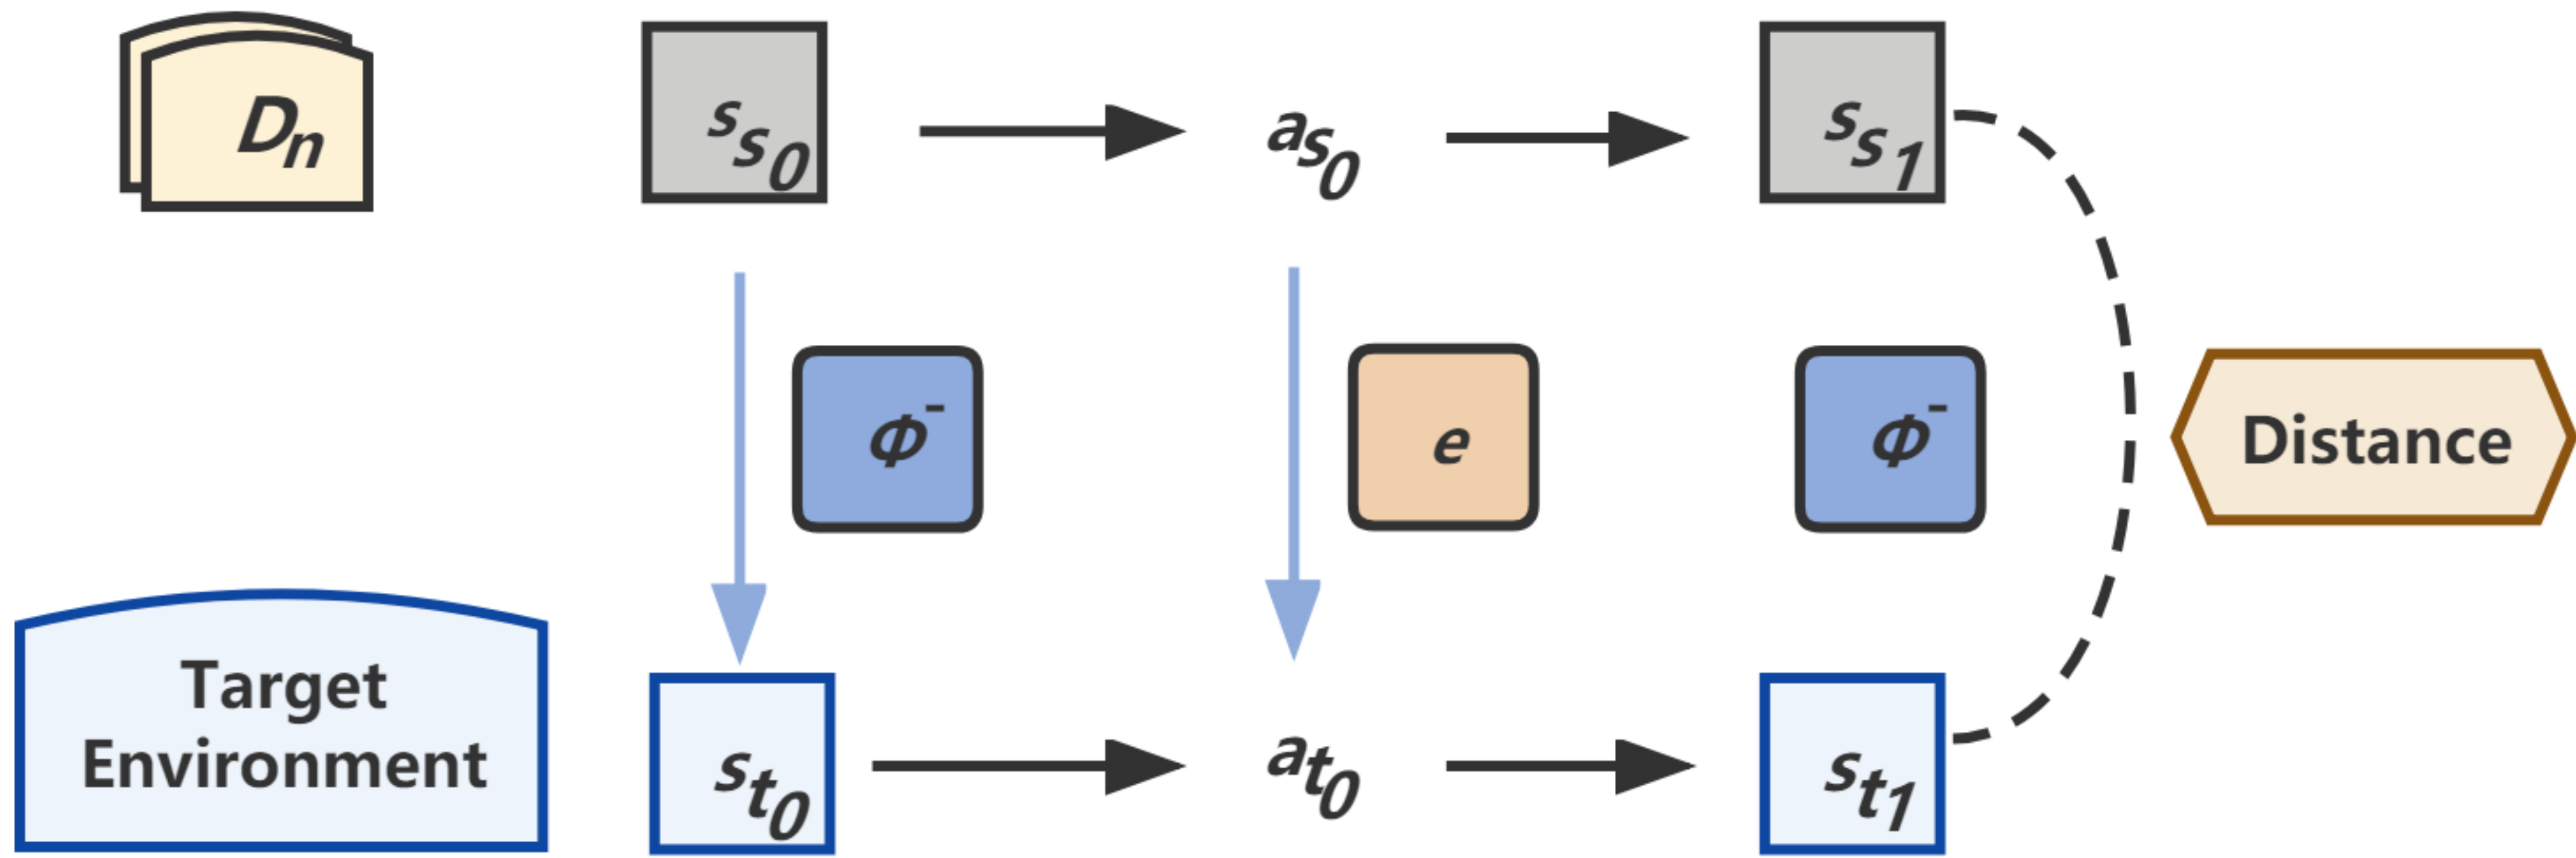

Supplement: supplementary_material [file attachment]

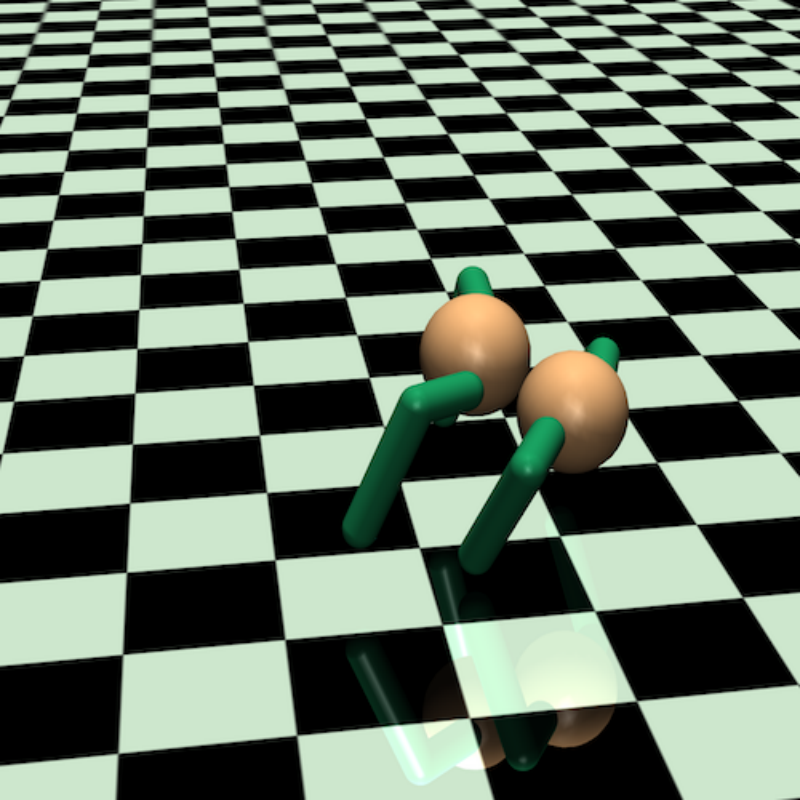

Supplement: supplementary_material [file attachment]

(a) Self-adaptation Module

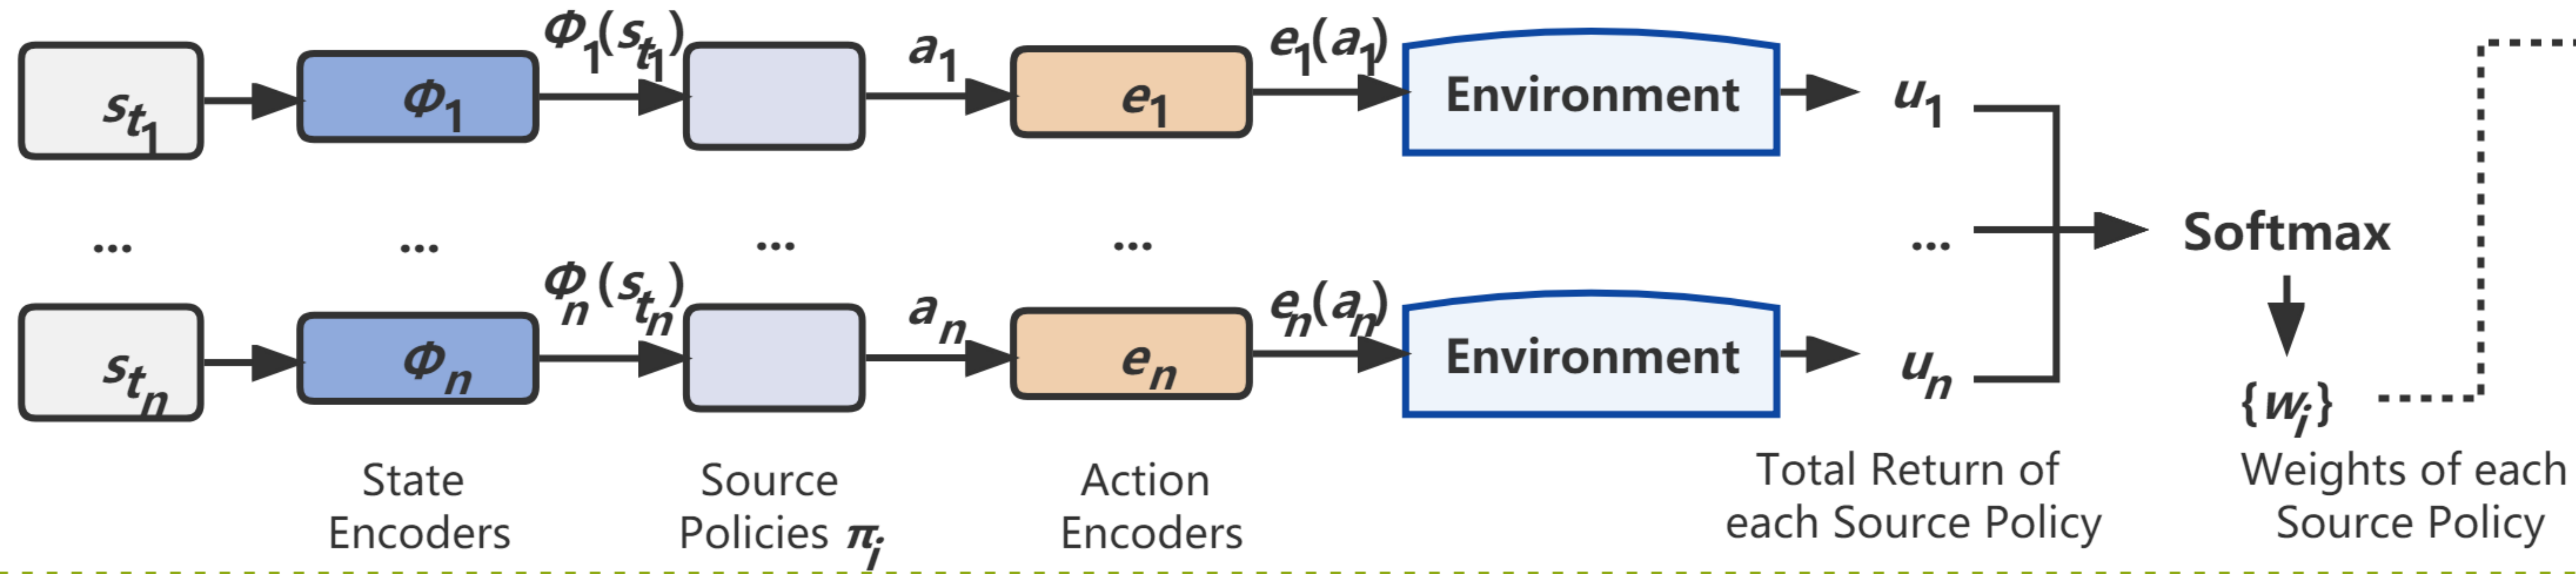

(b) Correction Module

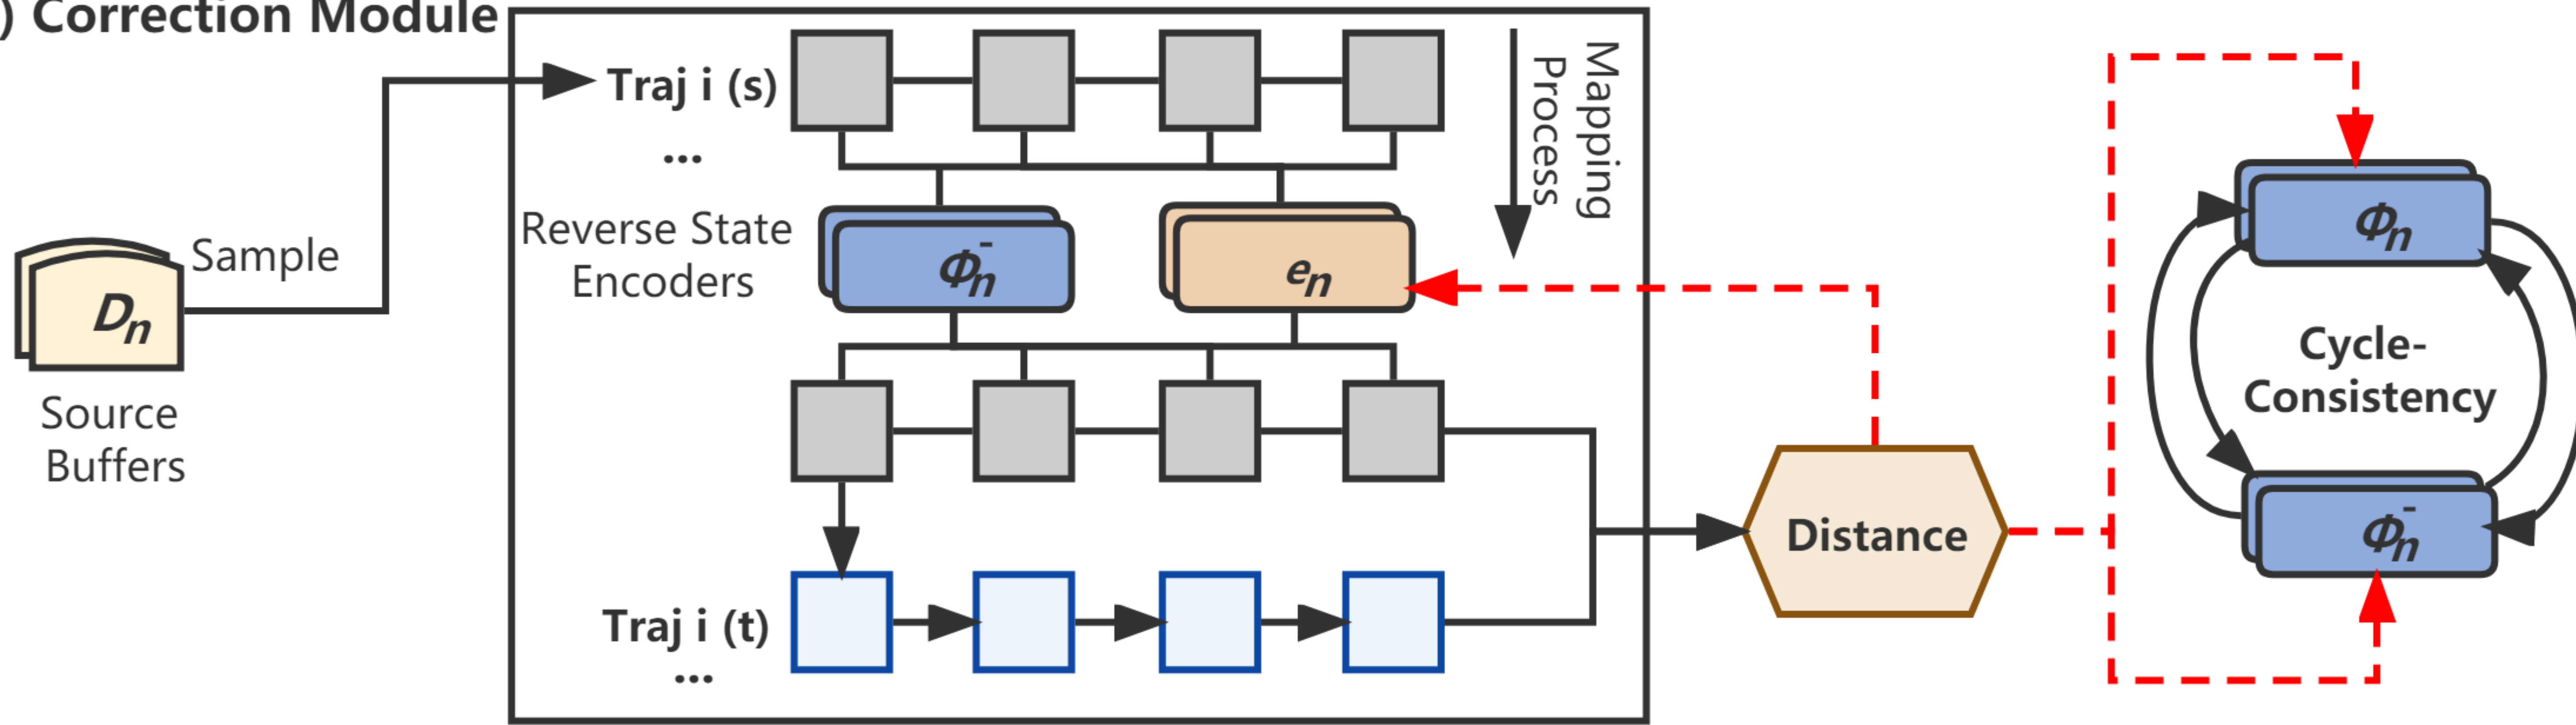

(c) Agent Module

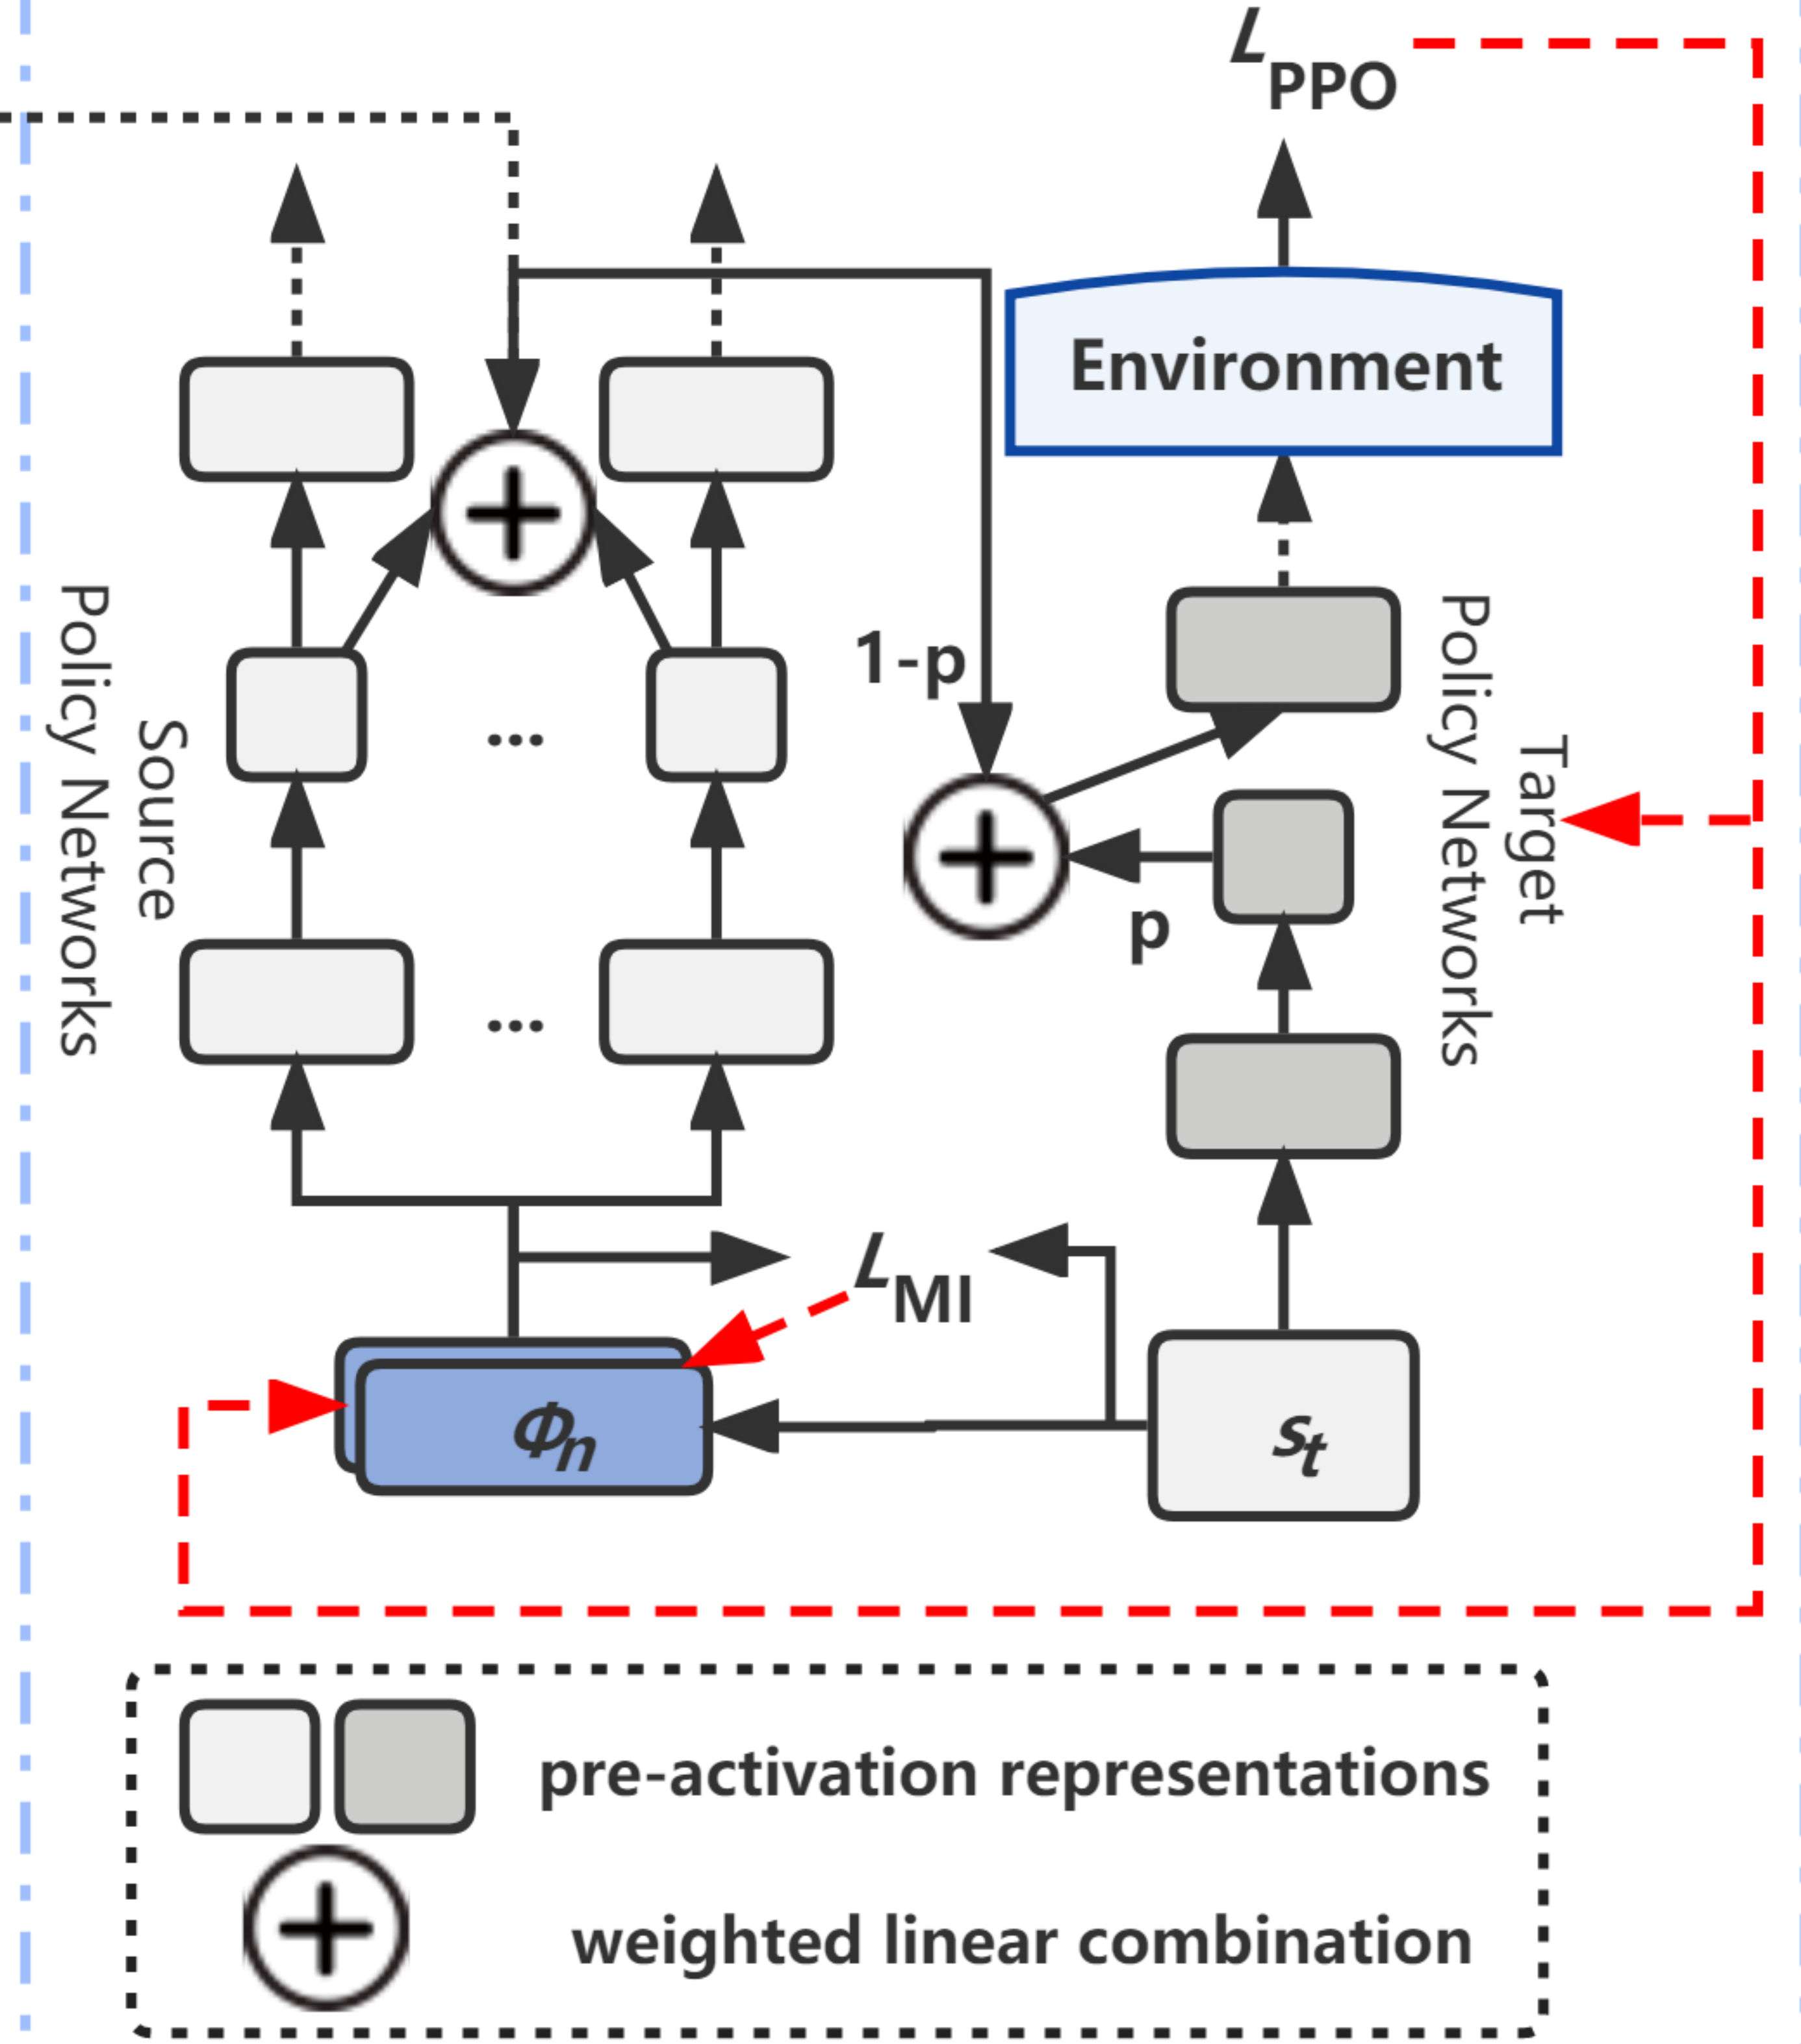

Supplement: supplementary_material [file attachment]

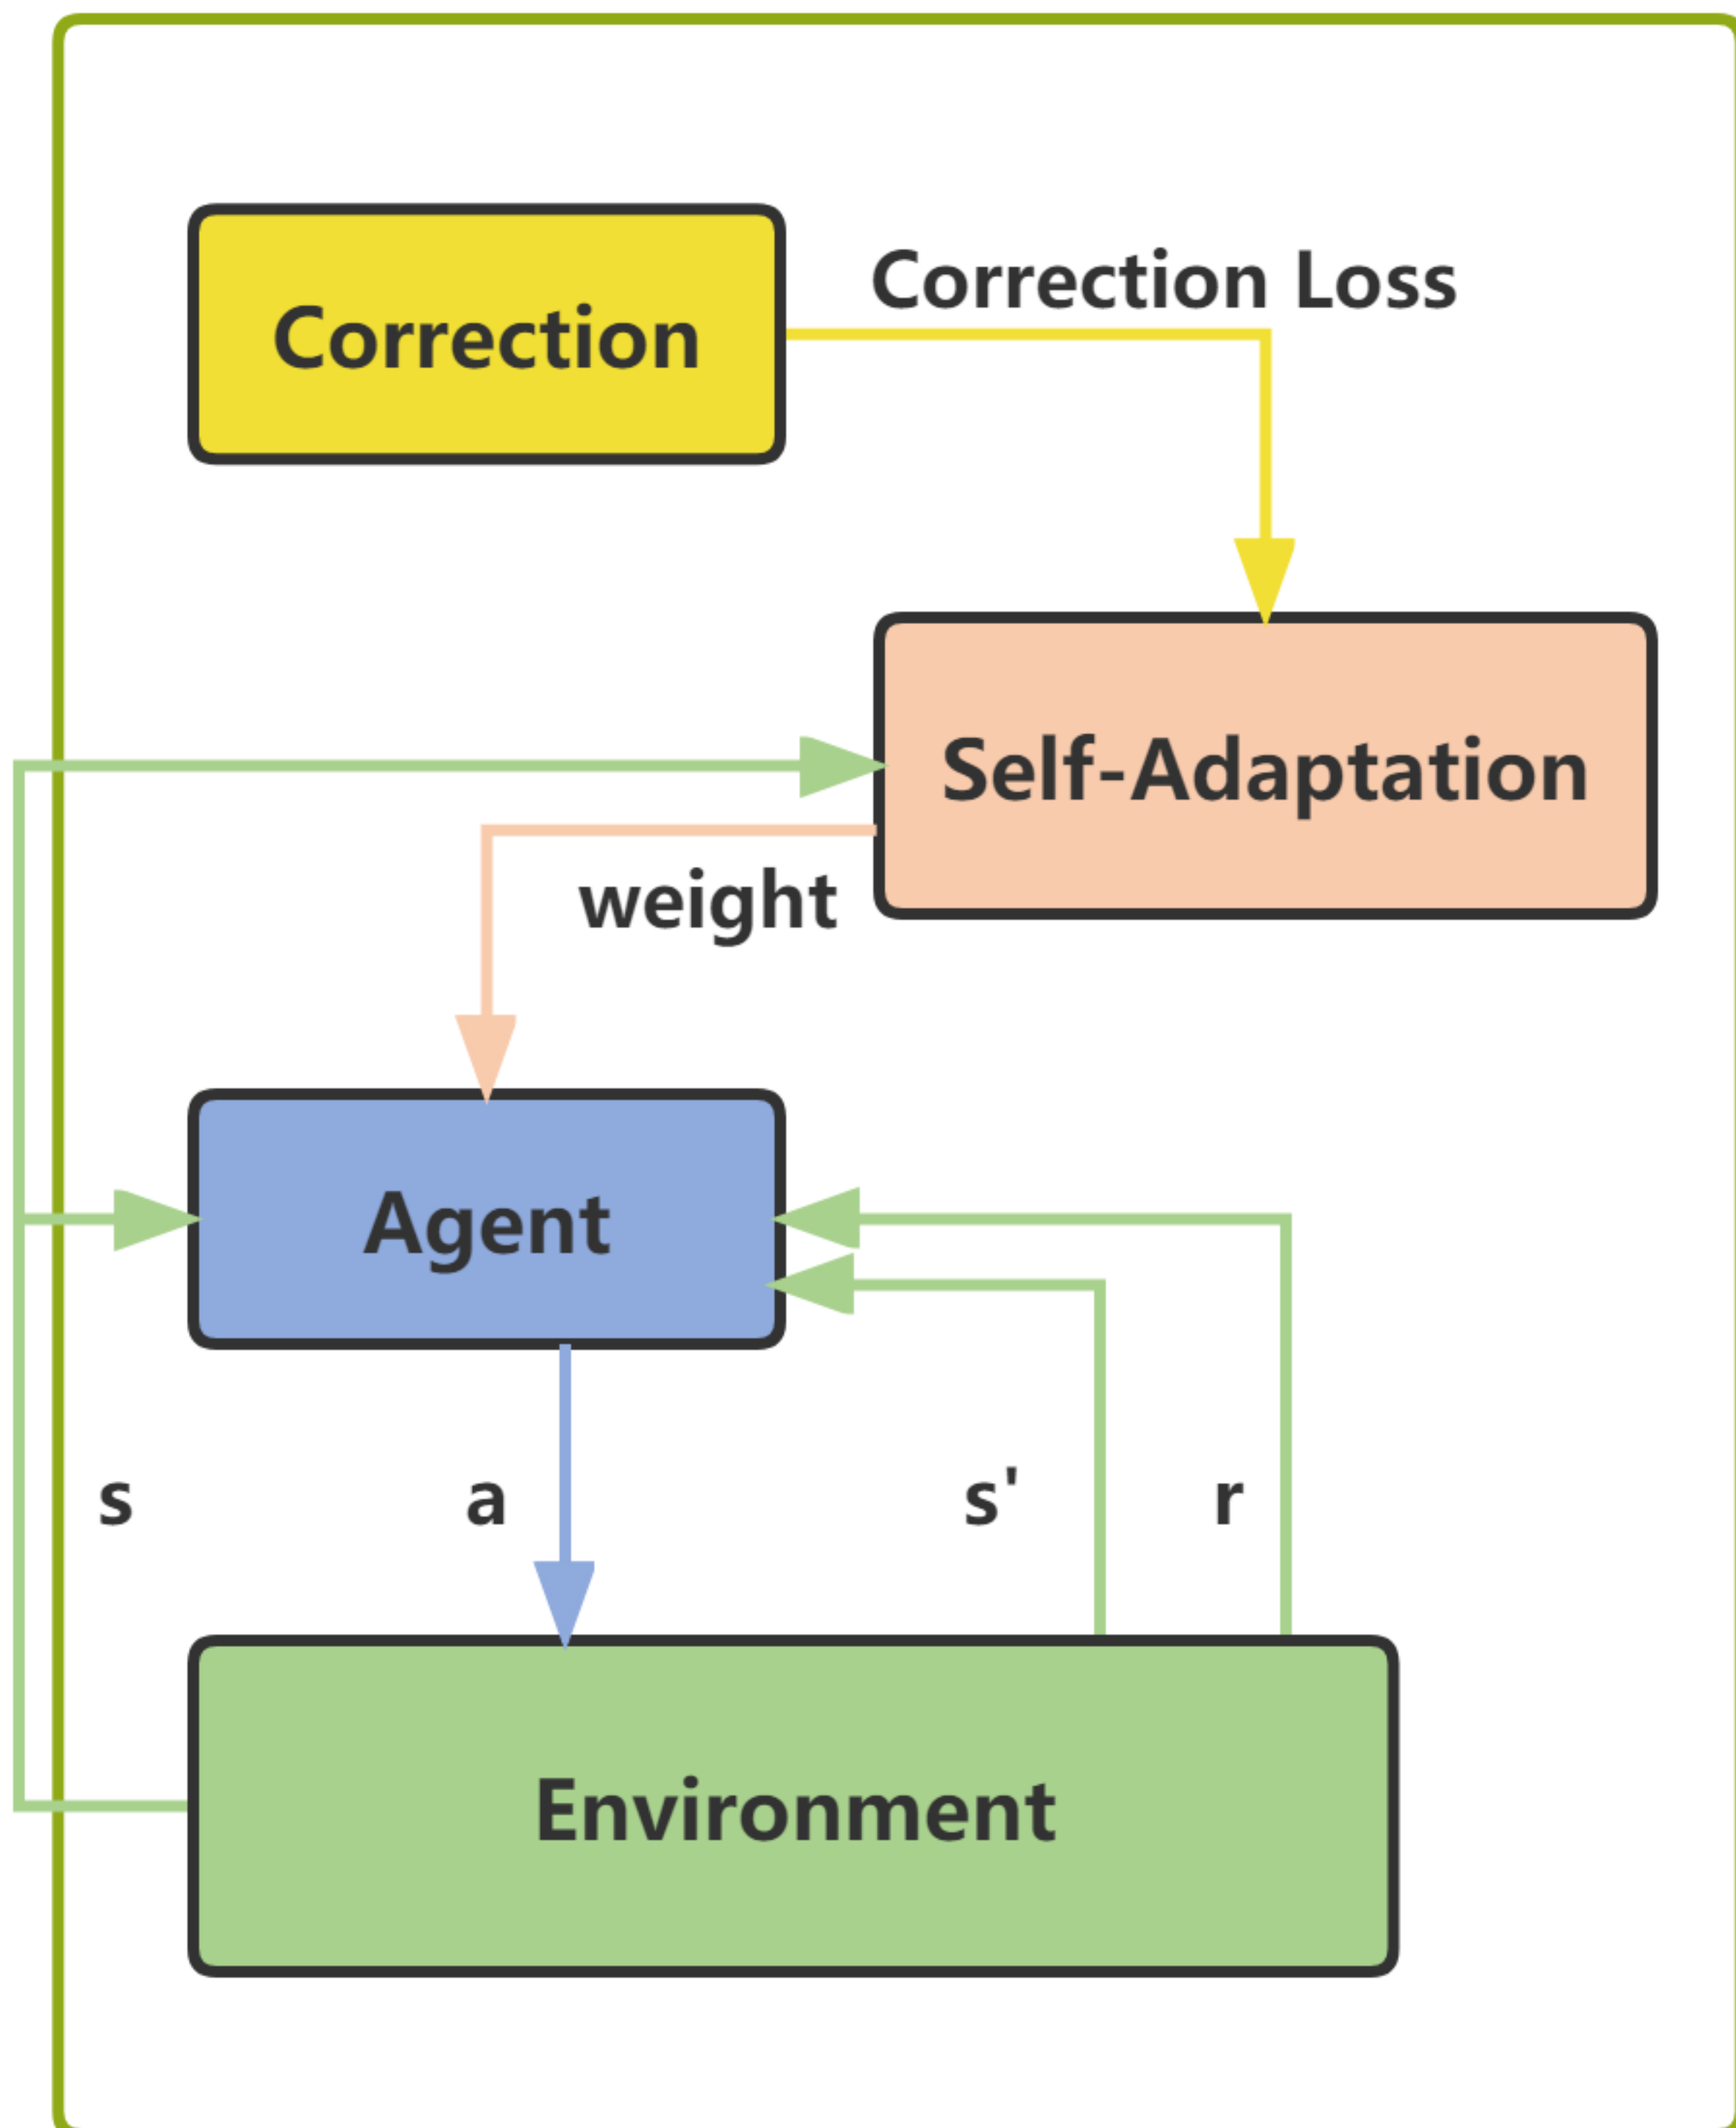

Supplement: supplementary_material [file attachment]

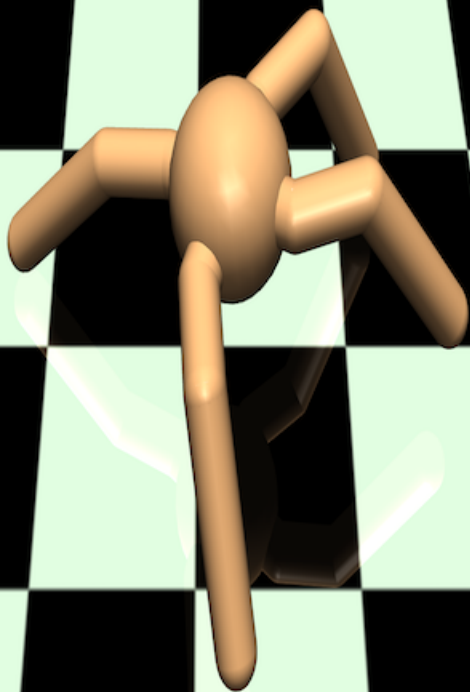

Supplement: supplementary_material [file attachment]

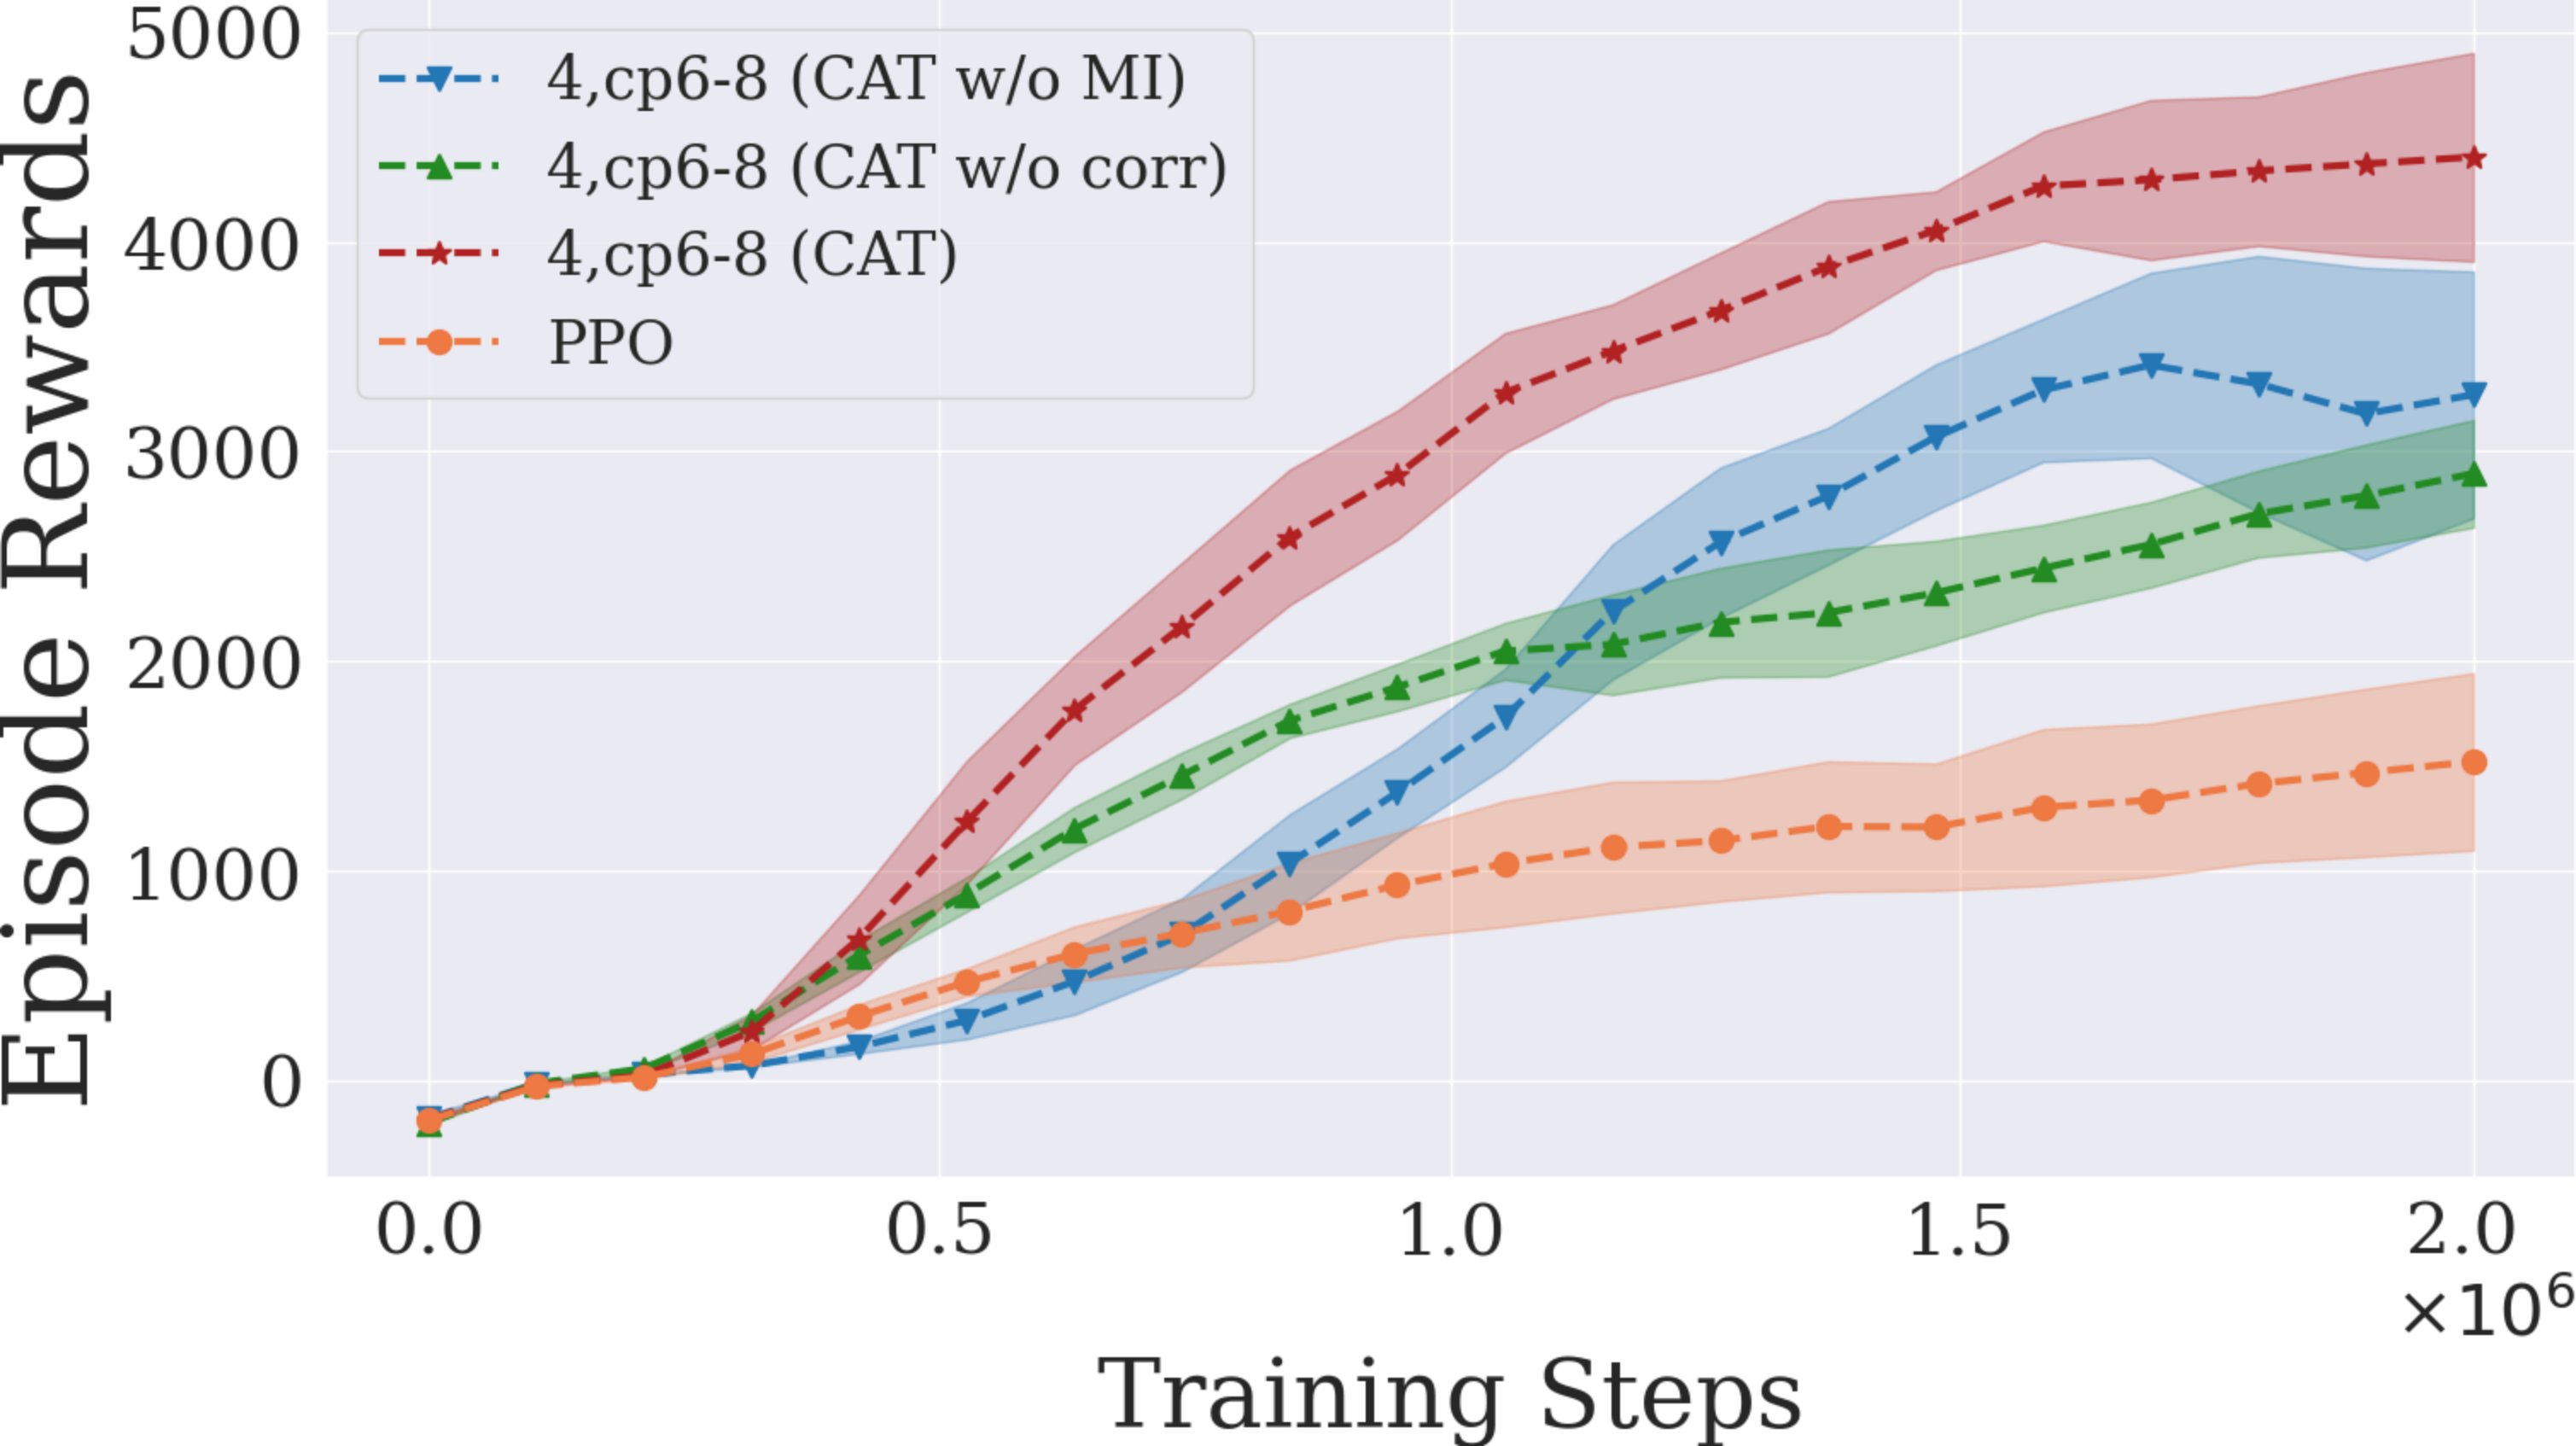

Supplement: supplementary_material [file attachment]

Episode Rewards

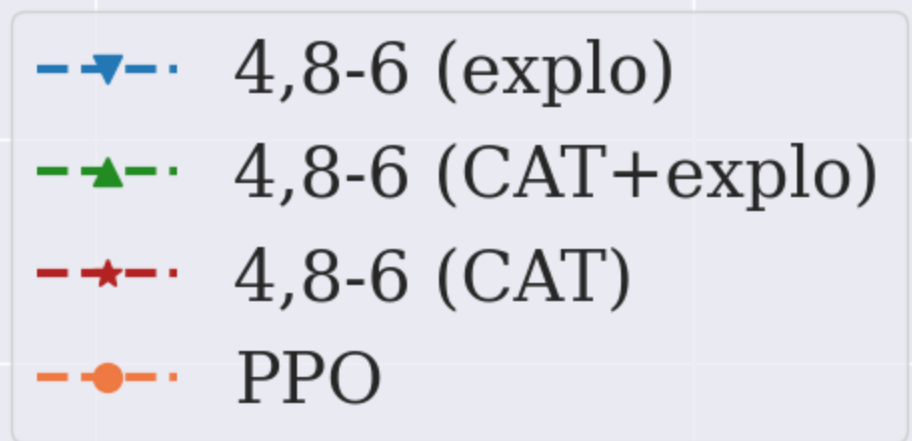

Training Steps

$\times 10^6$

Supplement: supplementary_material [file attachment]

Episode Rewards

- 4,ant-6 (explo)
- 4,ant-6 (CAT+explo)
- 4,ant-6 (CAT)
- PPO

0.0

0.5

1.0

1.5

2.0

$\times 10^6$

Training Steps

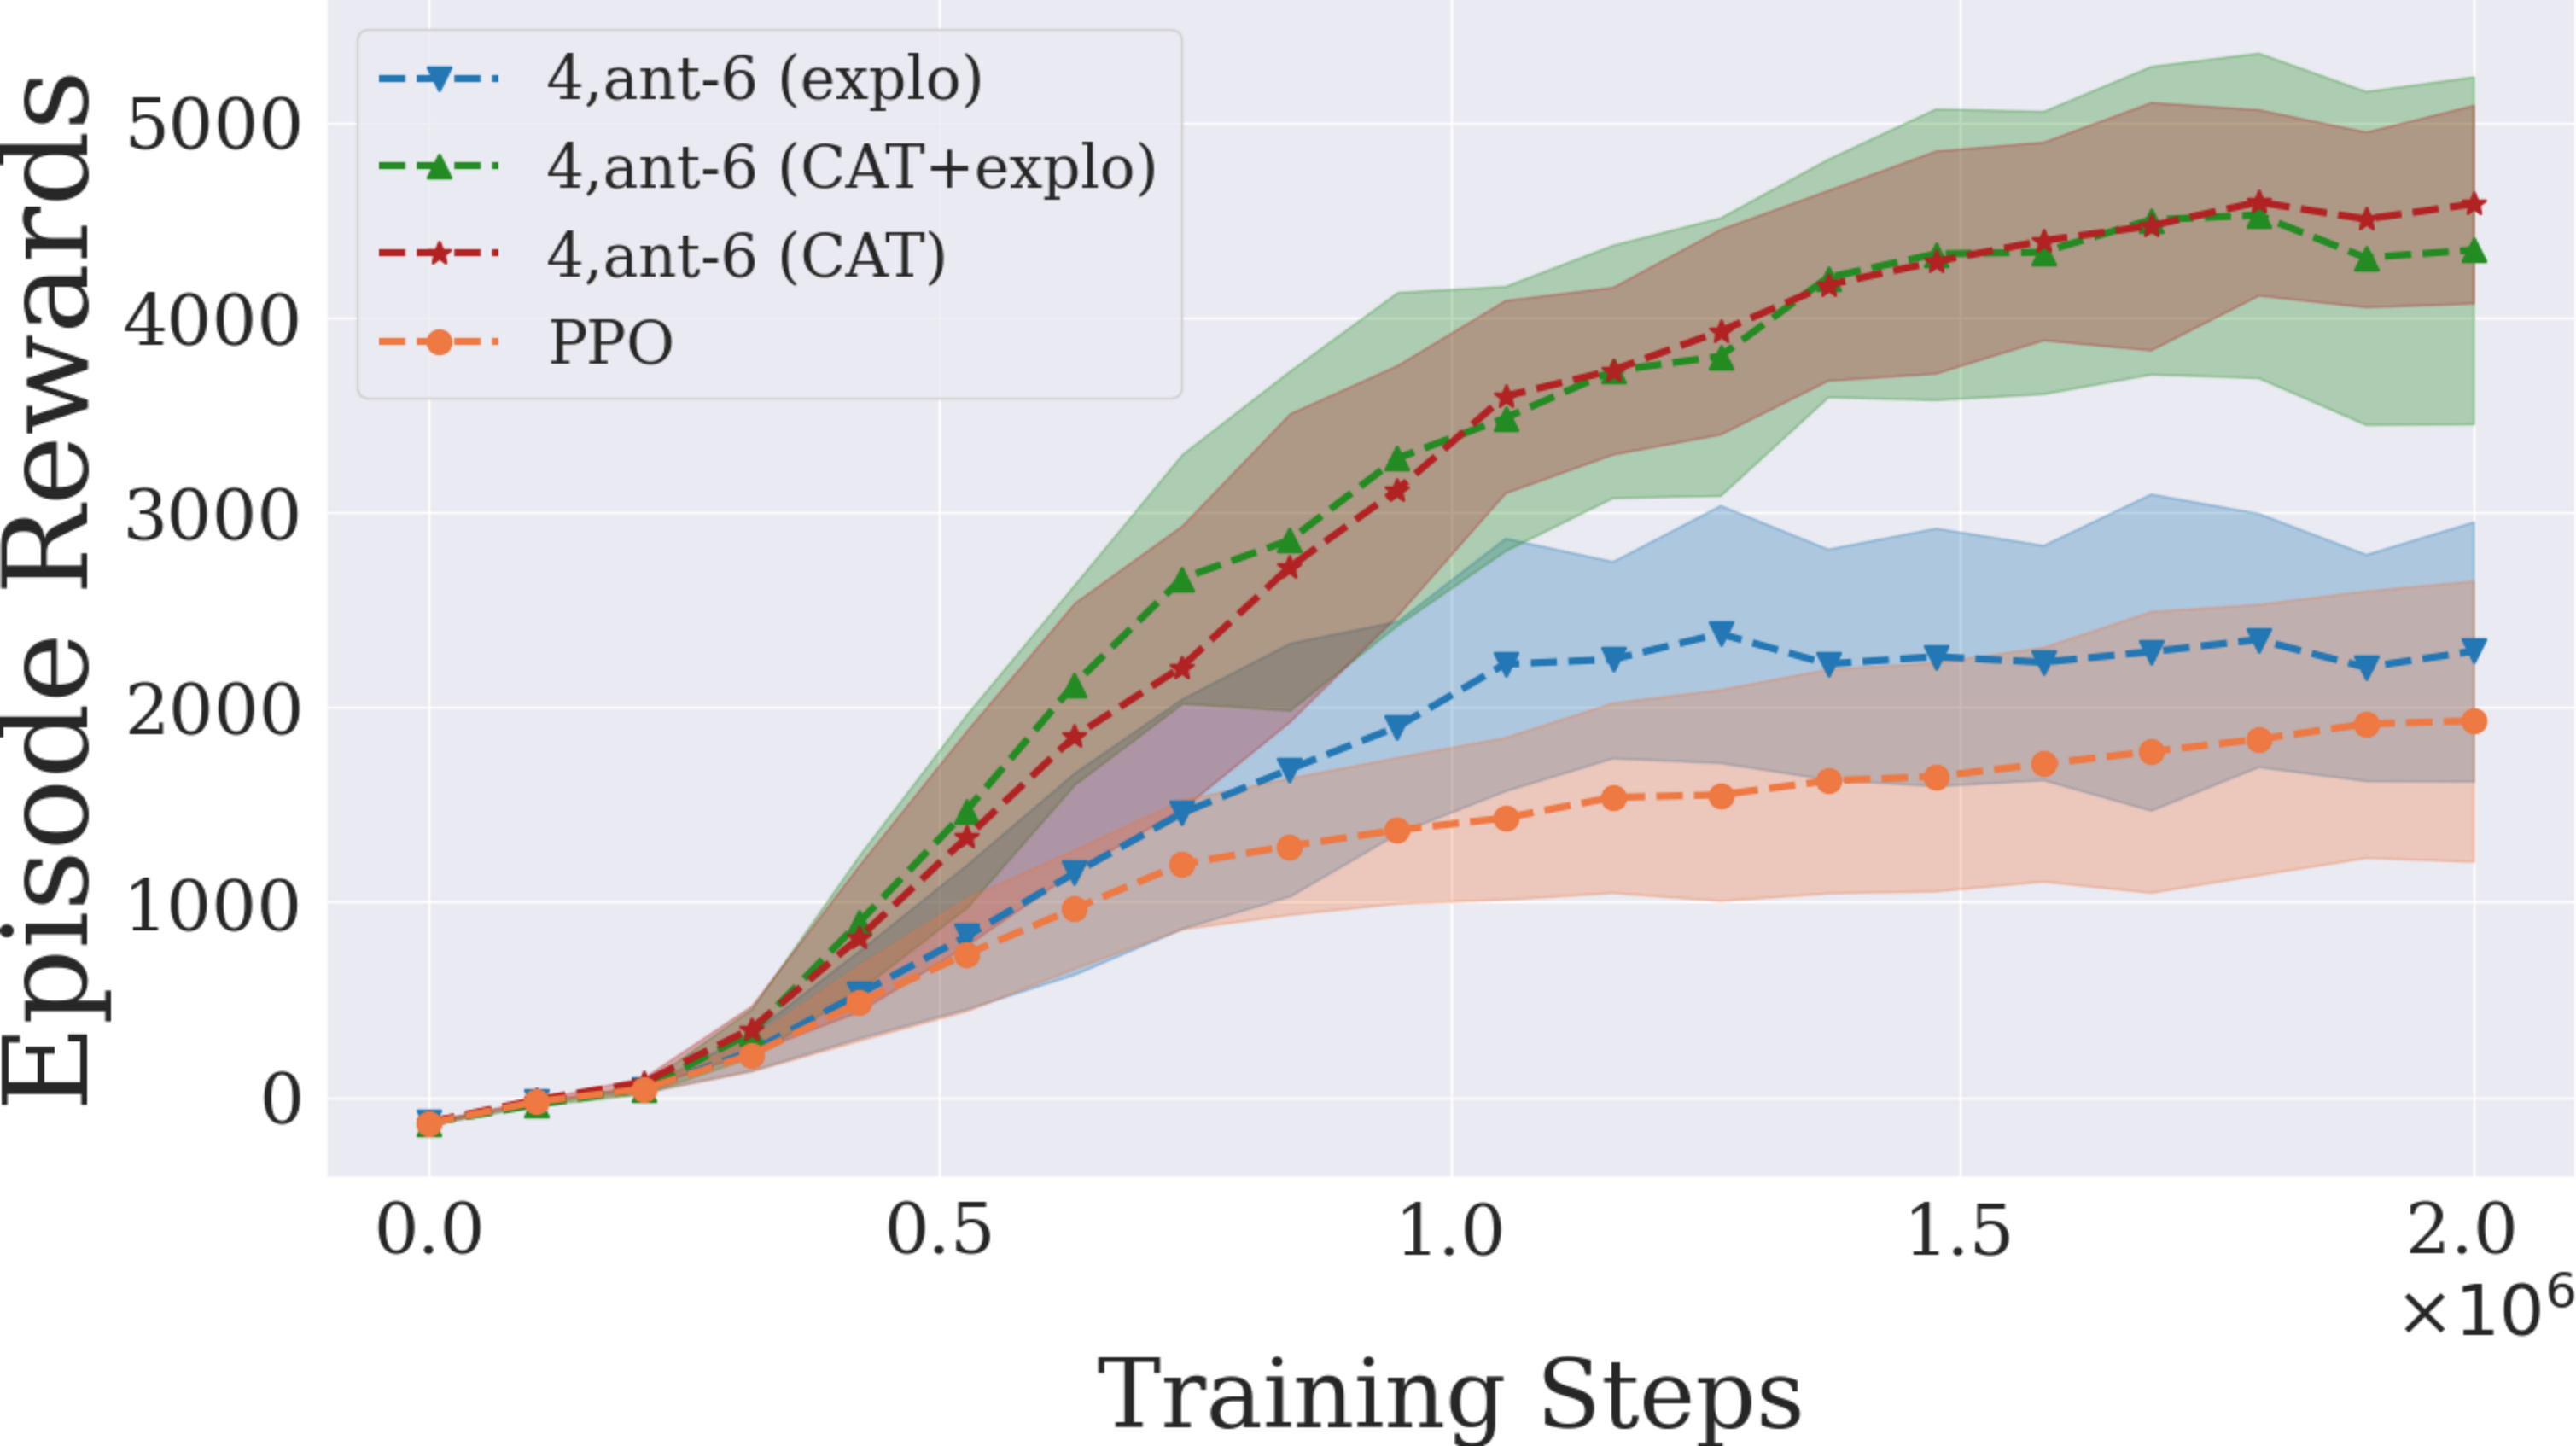

Supplement: supplementary_material [file attachment]
